# Supplementary material for: Ω-3 fatty acid supplement use in the 45 and Up Study Cohort
Source: PubMed Central journal article supplement — BMJ Open. 2013 Apr 11;3(4):e002292. doi: 10.1136/bmjopen-2012-002292 (PMC3641443; doi:10.1136/bmjopen-2012-002292), 2013-04-11
Supplement: bmjopen-2012-002292.draft_revisions.pdf [file bmjopen-2012-002292.draft_revisions.pdf]

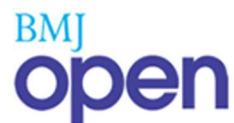

**Omega-3 Supplement Use: A Secondary Analysis of 266,848  
Australians aged 45 Years and Older**

|                                 |                                                                                                                                                                                                                                                                                                                                                         |
|---------------------------------|---------------------------------------------------------------------------------------------------------------------------------------------------------------------------------------------------------------------------------------------------------------------------------------------------------------------------------------------------------|
| Journal:                        | <i>BMJ Open</i>                                                                                                                                                                                                                                                                                                                                         |
| Manuscript ID:                  | bmjopen-2012-002292                                                                                                                                                                                                                                                                                                                                     |
| Article Type:                   | Research                                                                                                                                                                                                                                                                                                                                                |
| Date Submitted by the Author:   | 01-Nov-2012                                                                                                                                                                                                                                                                                                                                             |
| Complete List of Authors:       | Adams, Jon; University of Technology Sydney, Faculty of Health<br>Sibbritt, David; University of Technology Sydney, Faculty of Health<br>Lui, Chi-Wai; University of Queensland, School of Population Health<br>Broom, Alex; University of Queensland, School of Social Science<br>Wardle, Jonathan; University of Technology Sydney, Faculty of Health |
| <b>Primary Subject Heading</b>: | Complementary medicine                                                                                                                                                                                                                                                                                                                                  |
| Secondary Subject Heading:      | Public health                                                                                                                                                                                                                                                                                                                                           |
| Keywords:                       | COMPLEMENTARY MEDICINE, NUTRITION & DIETETICS, PUBLIC HEALTH                                                                                                                                                                                                                                                                                            |
|                                 |                                                                                                                                                                                                                                                                                                                                                         |

SCHOLARONE™  
Manuscripts

# TITLE PAGE

## **Omega-3 Supplement Use: A Secondary Analysis of 266,848 Australians aged 45 Years and Older**

Jon Adams

Professor, Faculty of Health, University of Technology Sydney, Sydney, Australia

David Sibbritt

Professor, Faculty of Health, University of Technology Sydney, Sydney, Australia

Chi-Wai Lui

Lecturer, School of Population Health, University of Queensland, Brisbane, Australia

Alex Broom

Associate Professor, School of Social Science, University of Queensland, Brisbane, Australia

Jonathan Wardle

Research Fellow, Faculty of Health, University of Technology Sydney, Sydney, Australia

1  
2  
3 *Correspondence:*  
4

5 Jon Adams  
6

7 Faculty of Health  
8

9 University of Technology Sydney  
10

11 Level 7 Building 10, 235-253 Jones Street  
12

13 Ultimo New South Wales 2007, Australia  
14

15 Email: [jon.adams@uts.edu.au](mailto:jon.adams@uts.edu.au)  
16

17 Phone: +61 2 9514 4821  
18

19 Fax: +61 2 9514 4835  
20  
21  
22  
23  
24  
25  
26  
27

28 **Keywords**  
29

30 Omega-3, fish oils, dietary supplements, utilization, adult  
31  
32  
33  
34  
35

36 **Word Count**  
37

38 2,362 words  
39  
40  
41  
42  
43  
44  
45  
46  
47  
48  
49  
50  
51  
52  
53  
54  
55  
56  
57  
58  
59  
60

## ABSTRACT

*Objective:* There has been a dramatic increase in the use of dietary supplements in Western industrialized societies over the past few decades and our understanding of the prevalence and pattern of omega-3 consumption is of significance for future nutrition planning, health promotion and health care delivery. However, we know very little about omega-3 consumption or users. This paper, drawing upon the largest dataset with regards to omega-3 use (n=266,848), examines the use and users of omega-3 amongst a large sample of older Australians.

*Design:* Cross-sectional study. A secondary analysis was made of data from the 45 and Up Study that is the largest study of healthy ageing ever undertaken in the Southern Hemisphere.

*Setting:* New South Wales, Australia.

*Participants:* 266,848 participants of the 45 and Up Study.

*Primary and Secondary Outcome Measures:* Participants' use of omega-3, demographics (geographical location, marital status, education level, income and level of healthcare insurance) and health status (quality of life, history of smoking and alcohol consumption, health conditions) were measured.

1  
2  
3 *Results:* Of the 266,848 participants, 86,939 (32.6%) reported having taken omega-3  
4  
5 in the 4 weeks prior to the survey. Use of omega-3 was higher among female, non-  
6  
7 smokers, non- to mild (alcoholic) drinkers, residing in a major city, having higher  
8  
9 income and private health insurance. Osteoarthritis, osteoporosis, high cholesterol,  
10  
11 and anxiety and/or depression were positively associated with omega-3 use, while  
12  
13 cancer and high blood pressure were negatively associated with use of omega 3.  
14  
15

16  
17  
18 *Conclusions:* This study suggests that a considerable proportion of older Australians  
19  
20 consume omega-3. There is a need for primary healthcare practitioners to enquire  
21  
22 with patients about omega-3 use and for work to ensure provision of good quality  
23  
24 information for patients and providers with regards to omega-3 products.  
25  
26  
27  
28  
29  
30  
31  
32  
33  
34  
35  
36  
37  
38  
39  
40  
41  
42  
43  
44  
45  
46  
47  
48  
49  
50  
51  
52  
53  
54  
55  
56  
57  
58  
59  
60

# ARTICLE SUMMARY

## Article Focus

- The use of dietary supplements has increased rapidly in Western societies over past decades.
- Our study examines the use of omega-3 amongst older Australians, drawing upon the largest study of healthy ageing undertaken in the Southern Hemisphere (n=266,848).

## Key Messages

- A considerable proportion of older Australians (32.6%) report using omega-3.
- Osteoarthritis, osteoporosis, high cholesterol, and anxiety and/or depression are positively associated with omega-3 use, while cancer and high blood pressure are negatively associated with the use of omega 3.
- There is a need to ensure provision of good quality information for patients and providers with regards to omega-3 products.

## Strengths and Limitations of this Study

- Our study benefits from the use of the largest sample of Australians aged 45 years and older with regards to the consumption of omega-3.
- The interpretation of our findings is limited by the fact that the use of omega-3 was self-reported by the participants and their answers may have been subject to recall bias.

## MAIN TEXT

### **Omega-3 Supplement Use: A Secondary Analysis of 266,848 Australians aged 45 Years and Older**

#### **INTRODUCTION**

There has been a dramatic increase in the use of dietary supplements in Western industrialized societies over the past few decades. The proportion of American adults using at least one dietary supplement has increased from 42% to 53% between 1994 and 2006<sup>1</sup> and research has shown the use of dietary supplements is common in many European countries.<sup>2</sup>

In 2007, a national US survey identified omega-3 – different types of fish oil products such as docosahexaenoic acid (DHA) and eicosapentaenoic acid (EPA) – as the first (for adults) and second (for children) most commonly used non-vitamin, non-mineral, natural product in America.<sup>3</sup> In Australia, a substantial proportion of GPs (80.3%) and community pharmacists (90.2%) recommend omega-3 to patients<sup>4</sup> and findings from this Australian research also identify omega-3 as among the top five complementary and alternative medicines about which healthcare professionals (71.6% of GP and 71.7% of pharmacists) desire better quality information.

The clinical evidence base for omega-3 is varied depending on the specific condition. There is evidence that omega-3 helps in preventing or benefiting the outcomes of cardiovascular disease<sup>5</sup> with some evidence suggesting a cholesterol lowering effect.

1  
2  
3 The National Heart Foundation of Australia recommends all Australian adults  
4  
5 consume about 500 mg (or 1,000 mg for those who have documented coronary heart  
6  
7 disease) of omega-3 fatty acids per day.<sup>6</sup>  
8  
9

10  
11 Beyond cardiovascular disease, existing research has found no evidence of a  
12  
13 significant association between omega-3 and reducing cancer incidence.<sup>7</sup> However,  
14  
15 there is some evidence that omega-3 fatty acids may improve clinical, biological and  
16  
17 quality of life parameters amongst patients with advanced cancer.<sup>8</sup> There is currently  
18  
19 insufficient scientific evidence on the efficacy of omega-3 regarding improvement of  
20  
21 mental health disorders,<sup>9</sup> <sup>10</sup> asthma,<sup>11</sup> cystic fibrosis,<sup>12</sup> rheumatoid arthritis,  
22  
23 inflammatory bowel disease and osteoporosis<sup>13</sup> and cognitive functions affected by  
24  
25 aging, dementia, and neurological diseases.<sup>14</sup>  
26  
27  
28  
29  
30

31  
32 In recent years the international public health agenda has partly focused on seeking  
33  
34 cost-effective strategies to improve public health nutrition<sup>15</sup> and in Australia, the  
35  
36 Federal Government indicated its commitment to the establishment of a  
37  
38 comprehensive National Food and Nutrition Framework and to the importance of  
39  
40 providing evidence-based nutrition and dietary guidelines to the public via the  
41  
42 National Preventive Health Strategy.<sup>16</sup> Furthermore, given the rise of population  
43  
44 ageing, increasing consumer interest in the value of healthy eating, exercise and  
45  
46 nutrition,<sup>17</sup> and growth in public awareness of the importance of preventive health,<sup>18</sup>  
47  
48 empirical analysis of the prevalence and pattern of omega-3 consumption is of  
49  
50 significance for future nutrition planning, health promotion and health care delivery.  
51  
52 In response, this paper reports the findings of the first study to examine the use and  
53  
54  
55  
56  
57  
58  
59  
60



1  
2  
3 users of omega-3 amongst a large sample of older Australians (n=266,848) aged 45  
4  
5 years and older.  
6  
7  
8  
9

## 10 11 **METHOD**

### 12 13 ***Sample***

14  
15 This research utilised data collected through the 45 and Up Study, which is the  
16  
17 largest study of healthy ageing conducted in the Southern Hemisphere and analyses  
18  
19 data from over 265,000 men and women aged 45 and older who reside in the State of  
20  
21 New South Wales, Australia. The 45 and Up study is described in detail elsewhere,<sup>19</sup>  
22  
23 but briefly participants were randomly selected from the Medicare Australia  
24  
25 database, which provides virtually complete coverage of the general population.  
26  
27 Participants joined the 45 and Up study by completing a postal questionnaire and  
28  
29 providing written consent for follow-up. Recruitment began in February 2006 and  
30  
31 the analyses reported in this paper relate to the 266,848 participants joining the  
32  
33 study at the close of December, 2009. The 45 and Up Study received ethics approval  
34  
35 from the University of New South Wales Human Research Ethics Committee.  
36  
37  
38  
39  
40  
41  
42  
43

### 44 45 ***Use of Omega-3***

46  
47 Participants were defined as being an omega-3 user if they answered 'yes' to the  
48  
49 following question: 'In the past 4 weeks have you taken fish oil or Omega-3.'  
50  
51

### 52 53 ***Demographic measures***

54  
55 Area of residence was assigned according to the Accessibility Remoteness Index of  
56  
57 Australia Plus score for each participant's postcode. Participants were asked about  
58  
59  
60

1  
2  
3 their current marital status, highest educational qualification they had completed,  
4  
5 annual household income, and their level of healthcare insurance.  
6  
7

### 8 9 ***Health status measures***

10  
11 Participants were asked to rate their overall health and overall quality of life on a  
12  
13 five-point Likert scale. They were also asked about their history of smoking and  
14  
15 amount of alcohol consumption. Participants were provided with a list of diseases  
16  
17 (e.g. osteoarthritis, osteoporosis, asthma, cancer) and asked if they had been treated  
18  
19 for any of the disease in the last month. A positive response to this question for a  
20  
21 particular disease was used to determine if a participant had that disease.  
22  
23  
24

### 25 26 27 ***Statistical analyses***

28  
29 The demographic and health status characteristics of omega-3 users and non-users  
30  
31 were compared using chi-square tests. Logistic regression modelling, that included  
32  
33 all demographic and health status characteristics variables, was conducted using a  
34  
35 backward stepwise method, to parsimoniously predict use of omega-3. In response to  
36  
37 the large sample size and multiple comparisons, a p-value <0.005 was adopted for  
38  
39 statistical significance.  
40  
41  
42  
43  
44  
45

## 46 47 **RESULTS**

48  
49 There were 266,846 participants who answered the question regarding consumption  
50  
51 of omega-3, of which 86,939 (32.6%) indicated that they had taken omega-3 in the 4  
52  
53 weeks prior to the survey.  
54  
55  
56  
57  
58  
59  
60

1  
2  
3 A comparison between participants who used omega-3 and those who did not use  
4 omega-3 by demographic characteristics is provided in Table 1. Use of omega-3 is  
5 highest among females ( $p < 0.0001$ ) and those aged 60-79 years ( $p < 0.0001$ ). Use of  
6 omega-3 was also higher for those participants: residing in inner regional areas  
7 ( $p < 0.0001$ ); having a trade, certificate of diploma ( $p < 0.0001$ ); having an annual  
8 household income of \$20,000-\$69,999 ( $p < 0.0001$ ); being widowed, divorced or  
9 separated ( $p < 0.0001$ ); and having private health insurance ( $p < 0.0001$ ).

10  
11  
12  
13  
14  
15  
16  
17  
18  
19  
20  
21 INSERT TABLE 1 HERE  
22  
23  
24

25 Table 2 shows a comparison between participants who used omega-3 and those who  
26 did not use omega-3 by health status characteristics. Use of omega-3 was highest  
27 among those participants who never smoked ( $p < 0.0001$ ), drank 0-6 alcoholic drinks  
28 per week ( $p < 0.0001$ ), and whose overall health and quality of life were rated as being  
29 excellent, very good, or good ( $p < 0.0001$ ). Participants who reported being treated for  
30 osteoarthritis ( $p < 0.0001$ ), osteoporosis ( $p < 0.0001$ ), asthma ( $p < 0.0001$ ), high blood  
31 pressure ( $p < 0.0001$ ), high cholesterol ( $p < 0.0001$ ), and thyroid problems ( $p < 0.0001$ )  
32 were all higher users of omega-3. Conversely, participants who reported being  
33 treated for cancer ( $p < 0.0001$ ), or did not report being treated for anxiety or  
34 depression ( $p < 0.0001$ ) were lower users of omega-3.

35  
36  
37  
38  
39  
40  
41  
42  
43  
44  
45  
46  
47  
48  
49 INSERT TABLE 2 HERE  
50  
51  
52

53 The result of the multiple logistic regression modelling is presented in Table 3. Of all  
54 the diseases examined osteoarthritis, osteoporosis, high cholesterol, and anxiety  
55  
56  
57

1  
2  
3 and/or depression were positively associated with use of omega-3, while cancer and  
4  
5 high blood pressure were negatively associated with the use of omega-3. That is, the  
6  
7 odds of omega-3 use was 1.65 (95% CI: 1.59, 1.72) times greater for those participants  
8  
9 reporting treatment for osteoarthritis compared to those without osteoarthritis. The  
10  
11 odds of omega-3 use was 1.09 (95% CI: 1.04, 1.15) times greater for those participants  
12  
13 reporting osteoporosis compared to those without osteoporosis. In comparison to  
14  
15 participants reporting treatment for either anxiety or depression, those participants  
16  
17 with anxiety only or both anxiety and depression were 1.16 (95% CI: 1.07, 1.26) and  
18  
19 1.19 (95% CI: 1.12, 1.27) times more likely to use omega-3, respectively. Those  
20  
21 participants reporting treatment for high cholesterol were 1.23 (95% CI: 1.19, 1.27)  
22  
23 times more likely to use omega-3 compared to those without high cholesterol. The  
24  
25 odds of omega-3 use was 0.89 (95% CI: 0.84, 0.95) and 0.95 (95% CI: 0.93, 0.98)  
26  
27 times lower for those participants reporting treatment for cancer and high blood  
28  
29 pressure, respectively.  
30  
31  
32  
33  
34  
35

36 INSERT TABLE 3 HERE  
37  
38  
39

40 Table 3 also shows that those participants who rated their overall health to be fair or  
41  
42 poor were 0.82 (95% CI: 0.79, 0.84) less likely to use omega-3. In comparison to  
43  
44 current smokers, participants who were former smokers (OR=1.66; 95% CI: 1.58,  
45  
46 1.74) or never smoked (OR=1.56; 95% CI: 1.49, 1.63) were more likely to use omega-  
47  
48 3. In comparison to those participants who drank 0-6 alcoholic drinks per week,  
49  
50 participants who drank 14-20 alcoholic drinks (OR=0.94; 95% CI: 0.91, 0.98) or  $\geq$  21  
51  
52 alcoholic drinks (OR=0.83; 95% CI: 0.80, 0.87) were less likely to use omega-3.  
53  
54  
55 Participants with no health insurance were 0.84 (95% CI: 0.82, 0.86) times less  
56  
57  
58  
59  
60

1  
2  
3 likely use omega-3 compared to participants with private health insurance. In terms  
4  
5 of household income, the odds of omega-3 use were 1.14 (95% CI: 1.11, 1.18) and 1.13  
6  
7 (95% CI: 1.09, 1.18) greater for participants with an income of \$20,000-\$49,999 and  
8  
9 \$50,000-\$69,999 respectively, compared to those with an income of <\$20,000. In  
10  
11 comparison to those participants who live in a major city, the odds of omega-3 use  
12  
13 are less for those living in outer regional areas (OR=0.89; 95% CI: 0.86, 0.92) and  
14  
15 remote or very remote areas (OR=0.86; 95% CI: 0.79, 0.93). In comparison to those  
16  
17 participants aged 45-49 years, all other age groups have greater odds of omega-3 use,  
18  
19 with the highest being those aged 60-69 (OR=1.84; 95% CI: 1.77, 1.91) and 70-79  
20  
21 (OR=1.76; 95% CI: 1.69, 1.85) years. In terms of gender, the odds of omega-3 use was  
22  
23 1.42 (95% CI: 1.39, 1.46) times greater for female participants.  
24  
25  
26  
27  
28  
29  
30

## 31 **DISCUSSION**

32  
33  
34 Our study, drawing upon the largest database with regards to omega-3 use to date  
35  
36 and constituting the first analyses of the profile of users and prevalence of use of  
37  
38 omega-3 in Australia, shows 32.6% of the study participants, aged 45 years and  
39  
40 older, consume omega-3. This finding identifies omega-3 as one of the most  
41  
42 commonly used dietary supplements in Australia and is in line with previous  
43  
44 research showing omega-3 as among the top five complementary and alternative  
45  
46 medicines recommended by Australian general practitioners and community  
47  
48 pharmacists.<sup>4</sup> The discovery of such a high level of omega-3 use suggests that further  
49  
50 research is needed to explore consumer behaviors and decision-making regarding  
51  
52 omega-3 use alongside assessing the possible health impacts of such consumption.  
53  
54  
55  
56  
57  
58  
59  
60

1  
2  
3 Overall, the findings of association between being female, of increased age, having  
4 advanced education *and* higher use of omega-3 are congruent with factors predicting  
5 broader complementary and alternative medicine use.<sup>3 20</sup> The association of omega-3  
6 use with higher annual income and private health insurance highlights the potential  
7 importance of cost of omega-3 products with regards to consumption and this issue  
8 warrants further investigation. It is also important to note that omega-3, like many  
9 complementary and alternative medicine products more generally, is not currently  
10 subsidised by the Australian Pharmaceutical Benefits Scheme (a Federal government  
11 program providing subsidised prescription drugs to residents) and as such attracts  
12 an added 10% goods and services tax. Our finding of a positive association of omega-  
13 3 use with higher annual income may also relate to the suggestion that  
14 socioeconomic status acts as a protective factor in health, with those having better  
15 life chances more likely to adopt self-care measures to maintain their health and  
16 quality of life.<sup>21</sup>

17  
18  
19  
20  
21  
22  
23  
24  
25  
26  
27  
28  
29  
30  
31  
32  
33  
34  
35  
36 The low use of omega-3 among participants resident in rural and remote areas  
37 compared to those respondents living in metropolitan locations contradicts the  
38 findings of previous research which show higher CAM use in rural areas in  
39 Australia.<sup>22</sup> The low use of omega-3 in these areas may reflect the lack of access to  
40 supplements in geographically isolated regions. Indeed, the urban-rural divide in the  
41 use of complementary and alternative medicine is an issue that has received much  
42 attention in recent years<sup>22-24</sup> and the finding of our study add to the evidence-base  
43 and discussion of this important health service issue and highlight the need for  
44 further investigation into the complexities of rural supplement use.

1  
2  
3 The variations in the association of omega-3 use with a range of clinical conditions  
4 are noteworthy, especially given the current varied clinical evidence-base of omega-3.  
5  
6  
7 The finding of low omega-3 use amongst people with cancer is not unexpected as  
8  
9  
10 research evidence suggests no association between omega-3 and reducing cancer  
11  
12 incidence.<sup>7</sup> However, it is somewhat surprising that high blood pressure is negatively  
13  
14 associated with the use of omega-3 as there is evidence that omega-3 has beneficial  
15  
16 effects in the context of cardiovascular disease and in lowering blood pressure.<sup>5</sup> This  
17  
18 is an area worthy of further empirical investigation.  
19

20  
21  
22 The association of higher omega-3 use with diseases such as osteoarthritis,  
23  
24 osteoporosis, anxiety and/or depression is interesting given there is currently either  
25  
26 no evidence or insufficient evidence on the efficacy of fish oil supplementation in  
27  
28 addressing these conditions – this suggests there may currently exist a mismatch  
29  
30 between clinical evidence and consumers' perceptions of evidence and benefits  
31  
32 regarding omega-3 use. Together, these study findings highlight the potential need  
33  
34 for nutrition guidelines for omega-3 intake and consumer awareness of the use of  
35  
36 omega-3 as well as possible enhanced information and labeling of relevant products  
37  
38 in Australia. The study findings also add weight to recently identified evidence  
39  
40 illustrating a desire for good quality information about omega-3 products amongst  
41  
42 GPs and pharmacists.<sup>4</sup>  
43  
44  
45  
46  
47  
48

49 The finding that respondents with better quality of life/health ratings or a healthy  
50  
51 lifestyle (e.g. non-smoking and/or having less alcoholic drinks) have greater odds of  
52  
53 omega-3 use may indicate that omega-3 is used for both the treatment of specific  
54  
55 health conditions and as a preventive therapy. Previous research suggests that this  
56  
57  
58  
59  
60

1  
2  
3 distinction between therapeutic and preventive use also exists for complementary  
4 and alternative medicine consumption more broadly.<sup>25</sup> Given these results, it would  
5 be useful for future studies to differentiate between these two approaches to use and  
6 to provide critical, in-depth examination of patients' motivations and understandings  
7 regarding consumption of omega-3 and other dietary supplements.  
8  
9  
10  
11  
12

13  
14  
15  
16 The interpretation of our findings is limited by the fact that the disease variable used  
17 from the 45 and Up Study survey was based on individuals reporting that they had  
18 been 'treated in last month' rather than 'ever been diagnosed' and that health and  
19 omega-3 and health care use is self-reported by the participants. As such our study  
20 results may be subject to recall bias. Nevertheless, these limitations are countered by  
21 the insights gained from analysing data from the largest sample of adults aged 45  
22 years and older with regards to their consumption of omega-3.  
23  
24  
25  
26  
27  
28  
29  
30  
31  
32  
33  
34  
35

## 36 **CONCLUSION**

37  
38 Omega-3 is consumed for a wide variety of purposes by a considerable proportion of  
39 Australians aged 45 years and over. In the context of these study findings there is a  
40 need for primary health care practitioners to enquire with their patients about their  
41 use of omega-3 as well as for further work to ensure provision of good quality  
42 information for patients and providers with regards to omega-3 products.  
43  
44  
45  
46  
47  
48  
49  
50  
51  
52  
53  
54  
55  
56  
57  
58  
59  
60



Table 1 Demographic characteristic of people aged 45 years and older by Omega-3 use

| Demographic Characteristics    | Use of Omega-3             |             | p-value |         |
|--------------------------------|----------------------------|-------------|---------|---------|
|                                | Yes                        | No          |         |         |
|                                | (n=86,939)                 | (n=179,907) |         |         |
|                                | %                          | %           |         |         |
| <b>Sex</b>                     | Female                     | 60          | 51      | <0.0001 |
|                                | Male                       | 40          | 49      |         |
| <b>Age (years)</b>             | 45-49                      | 10          | 14      | <0.0001 |
|                                | 50-59                      | 32          | 34      |         |
|                                | 60-69                      | 32          | 26      |         |
|                                | 70-79                      | 17          | 15      |         |
|                                | 80+                        | 9           | 11      |         |
| <b>Place of Residence</b>      | Major city                 | 45          | 45      | <0.0001 |
|                                | Inner regional             | 36          | 35      |         |
|                                | Outer regional             | 17          | 18      |         |
|                                | Remote/very remote         | 2           | 2       |         |
| <b>Education</b>               | School Certificate or less | 34          | 34      | 0.0001  |
|                                | Higher School Certificate  | 10          | 10      |         |
|                                | Trade/certificate/diploma  | 33          | 32      |         |
|                                | Tertiary                   | 23          | 24      |         |
| <b>Annual Household Income</b> | < \$20000                  | 25          | 25      | <0.0001 |
|                                | \$20000-\$49999            | 33          | 31      |         |
|                                | \$50000-\$69999            | 14          | 13      |         |
|                                | ≥ \$70000                  | 28          | 31      |         |

1  
2  
3  
4  
5  
6  
7  
8  
9  
10  
11  
12  
13  
14  
15  
16  
17  
18  
19  
20  
21  
22  
23  
24  
25  
26  
27  
28  
29  
30  
31  
32  
33  
34  
35  
36  
37  
38  
39  
40  
41  
42  
43  
44  
45  
46  
47  
48  
49  
50  
51  
52  
53  
54  
55  
56  
57  
58  
59  
60

|                       |                      |    |    |         |
|-----------------------|----------------------|----|----|---------|
| <b>Marital Status</b> | Married/defacto      | 75 | 75 | <0.0001 |
|                       | Widow/divorce/separ. | 20 | 19 |         |
|                       | Single               | 5  | 6  |         |
| <b>Health</b>         | Private              | 55 | 53 | <0.0001 |
| <b>Insurance</b>      | DVA or HCC           | 30 | 29 |         |
|                       | None                 | 15 | 18 |         |

---

For peer review only

Table 2 Health status characteristics of people aged 45 years and older by Omega-3 use

| Health Status Characteristics  | Use of Omega-3           |             | p-value |         |
|--------------------------------|--------------------------|-------------|---------|---------|
|                                | Yes                      | No          |         |         |
|                                | (n=86,939)               | (n=179,907) |         |         |
|                                | %                        | %           |         |         |
| <b>Smoking Status</b>          | Current smoker           | 5           | 8       | <0.0001 |
|                                | Former smoker            | 36          | 35      |         |
|                                | Never smoked             | 59          | 56      |         |
| <b>Alcohol Consumption</b>     | 0-6 drinks per week      | 64          | 62      | <0.0001 |
|                                | 7-13 drinks per week     | 19          | 19      |         |
|                                | 14-20 drinks per week    | 11          | 11      |         |
|                                | ≥ 21 drinks per week     | 6           | 8       |         |
| <b>Overall Health</b>          | Excellent/very good/good | 87          | 85      | <0.0001 |
|                                | Fair/poor                | 13          | 15      |         |
| <b>Overall Quality Of Life</b> | Excellent/very good/good | 90          | 89      | <0.0001 |
|                                | Fair/poor                | 10          | 11      |         |
| <b>Osteoarthritis</b>          | Yes                      | 11          | 7       | <0.0001 |
|                                | No                       | 89          | 93      |         |
| <b>Osteoporosis</b>            | Yes                      | 7           | 5       | <0.0001 |
|                                | No                       | 93          | 95      |         |

|    |                         |                 |    |    |         |
|----|-------------------------|-----------------|----|----|---------|
| 1  |                         |                 |    |    |         |
| 2  |                         |                 |    |    |         |
| 3  | <b>Asthma</b>           | Yes             | 5  | 4  | <0.0001 |
| 4  |                         | No              | 95 | 96 |         |
| 5  |                         |                 |    |    |         |
| 6  |                         |                 |    |    |         |
| 7  |                         |                 |    |    |         |
| 8  | <b>Cancer</b>           | Yes             | 2  | 3  | <0.0001 |
| 9  |                         | No              | 98 | 97 |         |
| 10 |                         |                 |    |    |         |
| 11 |                         |                 |    |    |         |
| 12 |                         |                 |    |    |         |
| 13 |                         |                 |    |    |         |
| 14 | <b>High Blood</b>       | Yes             | 26 | 24 | <0.0001 |
| 15 | <b>Pressure</b>         | No              | 74 | 76 |         |
| 16 |                         |                 |    |    |         |
| 17 |                         |                 |    |    |         |
| 18 |                         |                 |    |    |         |
| 19 | <b>High Cholesterol</b> | Yes             | 17 | 14 | <0.0001 |
| 20 |                         | No              | 83 | 86 |         |
| 21 |                         |                 |    |    |         |
| 22 |                         |                 |    |    |         |
| 23 |                         |                 |    |    |         |
| 24 |                         |                 |    |    |         |
| 25 | <b>Heart Attack or</b>  | Yes             | 3  | 3  | 0.2996  |
| 26 | <b>Angina</b>           | No              | 97 | 97 |         |
| 27 |                         |                 |    |    |         |
| 28 |                         |                 |    |    |         |
| 29 |                         |                 |    |    |         |
| 30 | <b>Other Heart</b>      | Yes             | 3  | 3  | 0.6606  |
| 31 | <b>Disease</b>          | No              | 97 | 97 |         |
| 32 |                         |                 |    |    |         |
| 33 |                         |                 |    |    |         |
| 34 |                         |                 |    |    |         |
| 35 |                         |                 |    |    |         |
| 36 | <b>Thyroid</b>          | Yes             | 6  | 5  | <0.0001 |
| 37 | <b>Problems</b>         | No              | 94 | 95 |         |
| 38 |                         |                 |    |    |         |
| 39 |                         |                 |    |    |         |
| 40 |                         |                 |    |    |         |
| 41 |                         |                 |    |    |         |
| 42 | <b>Anxiety &amp;</b>    | Neither         | 91 | 92 | <0.0001 |
| 43 | <b>Depression</b>       | Depression only | 4  | 4  |         |
| 44 |                         | Anxiety only    | 2  | 1  |         |
| 45 |                         | Both            | 3  | 3  |         |
| 46 |                         |                 |    |    |         |
| 47 |                         |                 |    |    |         |
| 48 |                         |                 |    |    |         |
| 49 |                         |                 |    |    |         |
| 50 |                         |                 |    |    |         |
| 51 |                         |                 |    |    |         |
| 52 |                         |                 |    |    |         |
| 53 |                         |                 |    |    |         |
| 54 |                         |                 |    |    |         |
| 55 |                         |                 |    |    |         |
| 56 |                         |                 |    |    |         |
| 57 |                         |                 |    |    |         |
| 58 |                         |                 |    |    |         |
| 59 |                         |                 |    |    |         |
| 60 |                         |                 |    |    |         |

**Table 3 Multiple logistic regression model for predicting use of Omega-3 in people aged 45 years and older**

| Factor                         |                    | Odds Ratio | 95% C.I.   |
|--------------------------------|--------------------|------------|------------|
| <b>Sex</b>                     | Male               | 1.00       | —          |
|                                | Female             | 1.42       | 1.39, 1.46 |
| <b>Age</b>                     | 45-49              | 1.00       | —          |
|                                | 50-59              | 1.43       | 1.39, 1.49 |
|                                | 60-69              | 1.84       | 1.77, 1.91 |
|                                | 70-79              | 1.76       | 1.69, 1.85 |
|                                | 80+                | 1.32       | 1.25, 1.39 |
| <b>Place of Residence</b>      | Major city         | 1.00       | —          |
|                                | Inner regional     | 0.98       | 0.96, 1.01 |
|                                | Outer regional     | 0.89       | 0.86, 0.92 |
|                                | Remote/very remote | 0.86       | 0.79, 0.93 |
| <b>Annual Household Income</b> | < \$20000          | 1.00       | —          |
|                                | \$20000-\$49999    | 1.14       | 1.11, 1.18 |
|                                | \$50000-\$69999    | 1.13       | 1.09, 1.18 |
|                                | ≥ \$70000          | 1.03       | 0.99, 1.07 |
| <b>Insurance</b>               | Private            | 1.00       | —          |
|                                | DVA or HCC         | 0.93       | 0.90, 0.95 |
|                                | None               | 0.84       | 0.82, 0.86 |
| <b>Smoking</b>                 | Current smoker     | 1.00       | —          |

|    |                       |                          |      |            |
|----|-----------------------|--------------------------|------|------------|
| 1  |                       |                          |      |            |
| 2  |                       |                          |      |            |
| 3  | <b>Status</b>         | Former smoker            | 1.66 | 1.58, 1.74 |
| 4  |                       | Never smoked             | 1.56 | 1.49, 1.63 |
| 5  |                       |                          |      |            |
| 6  |                       |                          |      |            |
| 7  |                       |                          |      |            |
| 8  | <b>Alcohol</b>        | 0-6 drinks per week      | 1.00 | —          |
| 9  |                       |                          |      |            |
| 10 | <b>Consumption</b>    | 7-13 drinks per week     | 1.02 | 0.99, 1.05 |
| 11 |                       | 14-20 drinks per week    | 0.94 | 0.91, 0.98 |
| 12 |                       | ≥ 21 drinks per week     | 0.83 | 0.80, 0.87 |
| 13 |                       |                          |      |            |
| 14 |                       |                          |      |            |
| 15 |                       |                          |      |            |
| 16 |                       |                          |      |            |
| 17 | <b>Overall</b>        | Excellent/very good/good | 1.00 | —          |
| 18 | <b>Health</b>         | Fair/poor                | 0.82 | 0.79, 0.84 |
| 19 |                       |                          |      |            |
| 20 |                       |                          |      |            |
| 21 |                       |                          |      |            |
| 22 | <b>Osteoarthritis</b> | No                       | 1.00 | —          |
| 23 |                       | Yes                      | 1.65 | 1.59, 1.72 |
| 24 |                       |                          |      |            |
| 25 |                       |                          |      |            |
| 26 |                       |                          |      |            |
| 27 | <b>Osteoporosis</b>   | No                       | 1.00 | —          |
| 28 |                       | Yes                      | 1.09 | 1.04, 1.15 |
| 29 |                       |                          |      |            |
| 30 |                       |                          |      |            |
| 31 |                       |                          |      |            |
| 32 |                       |                          |      |            |
| 33 | <b>Cancer</b>         | No                       | 1.00 | —          |
| 34 |                       | Yes                      | 0.89 | 0.84, 0.95 |
| 35 |                       |                          |      |            |
| 36 |                       |                          |      |            |
| 37 |                       |                          |      |            |
| 38 | <b>High Blood</b>     | No                       | 1.00 | —          |
| 39 | <b>Pressure</b>       | Yes                      | 0.95 | 0.93, 0.98 |
| 40 |                       |                          |      |            |
| 41 |                       |                          |      |            |
| 42 |                       |                          |      |            |
| 43 | <b>High</b>           | No                       | 1.00 | —          |
| 44 | <b>Cholesterol</b>    | Yes                      | 1.23 | 1.19, 1.27 |
| 45 |                       |                          |      |            |
| 46 |                       |                          |      |            |
| 47 |                       |                          |      |            |
| 48 | <b>Anxiety &amp;</b>  | Neither                  | 1.00 | —          |
| 49 | <b>Depression</b>     | Depression only          | 1.01 | 0.96, 1.07 |
| 50 |                       | Anxiety only             | 1.16 | 1.07, 1.26 |
| 51 |                       | Both                     | 1.19 | 1.12, 1.27 |
| 52 |                       |                          |      |            |
| 53 |                       |                          |      |            |
| 54 |                       |                          |      |            |
| 55 |                       |                          |      |            |
| 56 |                       |                          |      |            |
| 57 |                       |                          |      |            |
| 58 |                       |                          |      |            |
| 59 |                       |                          |      |            |
| 60 |                       |                          |      |            |

## ACKNOWLEDGEMENTS

We thank the men and women participating in the 45 and Up Study. The 45 and Up study is managed by the Sax Institute in collaboration with major partner Cancer Council New South Wales, and partners: the National Heart Foundation of Australia (NSW Division); NSW Health; *beyondblue: the national depression initiative*; Ageing, Disability and Home Care, Department of Human Services NSW; and UnitingCare Ageing.

## COMPETING INTERESTS

None.

## FUNDING

This research received no specific grant from any funding agency in the public, commercial or not-for-profit sectors.

## AUTHORS CONTRIBUTION

All authors devised the study and helped to conceptualize ideas, interpret findings, manuscript writing and reviewing drafts of the article. JA and DS acquired the data from the 45 and Up Study. DS undertook data analysis and JA, DS, CL, AB, JW

1  
2  
3 contributed to the interpretation of the data. All authors read and approved the final  
4  
5 manuscript.  
6  
7  
8  
9  
10

## 11 **DATA SHARING STATEMENT**

12  
13  
14  
15 There are no additional data available.  
16  
17  
18  
19  
20  
21  
22  
23  
24  
25  
26  
27  
28  
29  
30  
31  
32  
33  
34  
35  
36  
37  
38  
39  
40  
41  
42  
43  
44  
45  
46  
47  
48  
49  
50  
51  
52  
53  
54  
55  
56  
57  
58  
59  
60

For peer review only



## REFERENCES

1. Gahche J, Bailey R, Burt V, Hughes J, Yetley E, Dwyer J, et al. Dietary Supplement Use Among U.S. Adults Has Increased Since NHANES III (1988–1994). *NCHS Data Brief*. Atlanta: Centers for Disease Control and Prevention, 2011:1-8.
2. Skeie G, Braaten T, Hjartåker A, Lentjes M, Amiano P, Jakszyn P, et al. Use of dietary supplements in the European Prospective Investigation into Cancer and Nutrition calibration study. *Eur J Clin Nutr* 2009;63:226-38.
3. Barnes PM, Bloom B, Nahin RL. Complementary and Alternative Medicine Use Among Adults and Children: United States, 2007 Hyattsville: U.S. Department of Health and Human Services, Division of Health Interview Statistics, Centers for Disease Control and Prevention, National Center for Health Statistics, 2008.
4. Brown J, Morgan T, Adams J, Grunseit A, Toms M, Roufogalis B, et al. Complementary Medicines Information Use and Needs of Health Professionals: General Practitioners and Pharmacists. Sydney: National Prescribing Service, 2008.
5. Wang C, Harris WS, Chung M, Lichtenstein AH, Balk EM, Kupelnick B, et al. n-3 Fatty acids from fish or fish-oil supplements, but not alpha-linolenic acid, benefit cardiovascular disease outcomes in primary- and secondary-prevention studies: a systematic review. *Am J Clin Nutr* 2006;84(1):5-17.
6. National Heart Foundation of Australia. Position Statement: Fish, Fish Oils, n-3 Polyunsaturated Fatty Acids and Cardiovascular Health. Sydney: National Heart Foundation of Australia, 2008.

- 1  
2  
3 7. MacLean CH, Newberry SJ, Mojica WA, Khanna P, Issa AM, Suttorp MJ, et al.  
4  
5 Effects of omega-3 fatty acids on cancer risk: a systematic review. *JAMA:*  
6  
7 *Journal of the American Medical Association* 2006;295(4):403-15.  
8
- 9  
10 8. Colomera R, Moreno-Nogueiraa JM, García-Lunaa PP, García-Perisa P, García-de-  
11  
12 Lorenzoa A, Zarazagaa A, et al. N-3 fatty acids, cancer and cachexia: a  
13  
14 systematic review of the literature. *British Journal of Nutrition*  
15  
16 2007;97(5):823-31.  
17
- 18  
19 9. Lin P-Y, Su K-P. A meta-analytic review of double-blind, placebo-controlled trials  
20  
21 of antidepressant efficacy of Omega-3 fatty acids. *Journal of Clinical*  
22  
23 *Psychiatry* 2007;68(7):1056-61.  
24
- 25  
26 10. Montgomery P, Richardson AJ. Omega-3 fatty acids for bipolar disorder.  
27  
28 *Cochrane Database of Systematic Reviews* 2008(2):Art. No.: CD005169.  
29  
30 DOI: 10.1002/14651858.CD005169.pub2.  
31
- 32  
33 11. Thien FCK, De Luca S, Woods RK, Abramson MJ. Dietary marine fatty acids (fish  
34  
35 oil) for asthma in adults and children. *Cochrane Database of Systematic*  
36  
37 *Reviews* 2002(2):Art. No.: CD001283. DOI: 10.1002/14651858.CD001283.  
38
- 39  
40 12. Oliver C, Everard M, N'Diaye T. Omega-3 fatty acids (from fish oils) for cystic  
41  
42 fibrosis. *Cochrane Database of Systematic Reviews* 2007(4).  
43
- 44  
45 13. Agency for Healthcare Research and Quality. Effects of omega-3 fatty acids on  
46  
47 lipids and glycemic control in type II diabetes and the metabolic syndrome  
48  
49 and on inflammatory bowel disease, rheumatoid arthritis, renal disease,  
50  
51 systemic lupus erythematosus, and osteoporosis. Rockville: Agency for  
52  
53 Healthcare Research and Quality, 2004.  
54  
55  
56  
57  
58  
59  
60

- 1  
2  
3 14. Lim WS, Gammack JK, Van Niekerk JK, Dangour A. Omega 3 fatty acid for the  
4 prevention of dementia. *Cochrane Database of Systematic Reviews*  
5 2006(1):Art. No.: CD005379. DOI: 10.1002/14651858.CD005379.pub2.  
6  
7  
8  
9  
10 15. World Health Organization. Reducing Risks, Promoting Healthy Life. Geneva:  
11 World Health Organization, 2005.  
12  
13  
14 16. National Preventive Health Taskforce. National Preventive Health Strategy - the  
15 Roadmap for Action. Canberra: Commonwealth of Australia, 2009.  
16  
17  
18 17. Nichter M, Jo Thompson J. For my wellness, not just my illness: North  
19 Americans' use of dietary supplements. *Culture, Medicine and Psychiatry*  
20 2006;30(2):175-222.  
21  
22  
23  
24 18. Kickbusch I, Payne L. Twenty-first century health promotion: the public health  
25 revolution meets the wellness revolution. *Health Promotion International*  
26 2003;18(4):275-78.  
27  
28  
29  
30 19. 45 and Up Study Collaborators. Cohort profile: the 45 and Up Study.  
31  
32  
33  
34  
35  
36 20. Adams J, Sibbritt D, Easthope G, Young A. The profile of women who consult  
37 alternative health practitioners in Australia. *Medical Journal of Australia*  
38 2003;179:297-300.  
39  
40  
41  
42 21. Cockerham WC. Health lifestyles: Bringing structure back. In: Cockerham WC,  
43 editor. *The New Blackwell Companion to Medical Sociology*. Oxford: Wiley-  
44 Blackwell, 2009:159-83.  
45  
46  
47  
48 22. Wardle J, Lui C-W, Adams J. Complementary and alternative medicine in rural  
49 communities: current research and future directions. *Journal of Rural Health*  
50 2012;28(1):101-12.  
51  
52  
53  
54  
55  
56  
57  
58  
59  
60

- 1  
2  
3 23. Adams J, Sibbritt D, Lui C-W. The urban-rural divide in complementary and  
4  
5 alternative medicine use: a longitudinal study of 10,638 women. *BMC*  
6  
7 *Complementary and Alternative Medicine* 2011;11(2).  
8  
9  
10 24. Adams J. Exploring the interface between complementary and alternative  
11  
12 medicine (CAM) and rural general practice: A call for research. *Health and*  
13  
14 *Place* 2004;10(3):285-87.  
15  
16 25. Bishop FL, Yardley L, Lewith GT. Treat or treatment - a qualitative study  
17  
18 analyzing patients' use of CAM. *American Journal of Public Health*  
19  
20 2008;98(9):1700-05.  
21  
22  
23  
24  
25  
26  
27  
28  
29  
30  
31  
32  
33  
34  
35  
36  
37  
38  
39  
40  
41  
42  
43  
44  
45  
46  
47  
48  
49  
50  
51  
52  
53  
54  
55  
56  
57  
58  
59  
60



**Omega-3 Fatty Acid Supplement Use: An Analysis of  
266,848 Australians aged 45 Years and Older**

|                                 |                                                                                                                                                                                                                                                                                                                                                         |
|---------------------------------|---------------------------------------------------------------------------------------------------------------------------------------------------------------------------------------------------------------------------------------------------------------------------------------------------------------------------------------------------------|
| Journal:                        | <i>BMJ Open</i>                                                                                                                                                                                                                                                                                                                                         |
| Manuscript ID:                  | bmjopen-2012-002292.R1                                                                                                                                                                                                                                                                                                                                  |
| Article Type:                   | Research                                                                                                                                                                                                                                                                                                                                                |
| Date Submitted by the Author:   | 12-Feb-2013                                                                                                                                                                                                                                                                                                                                             |
| Complete List of Authors:       | Adams, Jon; University of Technology Sydney, Faculty of Health<br>Sibbritt, David; University of Technology Sydney, Faculty of Health<br>Lui, Chi-Wai; University of Queensland, School of Population Health<br>Broom, Alex; University of Queensland, School of Social Science<br>Wardle, Jonathan; University of Technology Sydney, Faculty of Health |
| <b>Primary Subject Heading</b>: | Complementary medicine                                                                                                                                                                                                                                                                                                                                  |
| Secondary Subject Heading:      | Public health                                                                                                                                                                                                                                                                                                                                           |
| Keywords:                       | COMPLEMENTARY MEDICINE, NUTRITION & DIETETICS, PUBLIC HEALTH                                                                                                                                                                                                                                                                                            |
|                                 |                                                                                                                                                                                                                                                                                                                                                         |

SCHOLARONE™  
Manuscripts

Peer Review Only

# TITLE PAGE

## **Omega-3 Fatty Acid Supplement Use: An Analysis of 266,848 Australians aged 45 Years and Older**

Jon Adams

Professor, Faculty of Health, University of Technology Sydney, Sydney, Australia

David Sibbritt

Professor, Faculty of Health, University of Technology Sydney, Sydney, Australia

Chi-Wai Lui

Lecturer, School of Population Health, University of Queensland, Brisbane, Australia

Alex Broom

Associate Professor, School of Social Science, University of Queensland, Brisbane,

Australia

Jonathan Wardle

Research Fellow, Faculty of Health, University of Technology Sydney, Sydney,

Australia

1  
2  
3 *Correspondence:*  
4

5 Jon Adams  
6

7 Faculty of Health  
8

9 University of Technology Sydney  
10

11 Level 7 Building 10, 235-253 Jones Street  
12

13 Ultimo New South Wales 2007, Australia  
14

15 Email: [jon.adams@uts.edu.au](mailto:jon.adams@uts.edu.au)  
16

17 Phone: +61 2 9514 4821  
18

19 Fax: +61 2 9514 4835  
20  
21  
22  
23  
24  
25  
26  
27

28 **Keywords**  
29

30 Omega-3, fish oils, dietary supplements, utilization, adult  
31  
32  
33  
34  
35

36 **Word Count**  
37

38 3,020 words  
39  
40  
41  
42  
43  
44  
45  
46  
47  
48  
49  
50  
51  
52  
53  
54  
55  
56  
57  
58  
59  
60

## ABSTRACT

*Objective:* There has been a dramatic increase in the use of dietary supplements in Western societies over the past decades. Our understanding of the prevalence of omega-3 fatty acid supplement consumption is of significance for future nutrition planning, health promotion and care delivery. However, we know little about omega-3 fatty acid supplement consumption or users. This paper, drawing upon the largest dataset with regards to omega-3 fatty acid supplement use (n=266,848), examines the use and users of this supplement amongst a large sample of older Australians living in New South Wales.

*Design:* Cross-sectional study. Data were analysed from the 45 and Up Study, the largest study of healthy ageing ever undertaken in the Southern Hemisphere.

*Setting:* New South Wales, Australia.

*Participants:* 266,848 participants of the 45 and Up Study.

*Primary and Secondary Outcome Measures:* Participants' use of omega-3, demographics (geographical location, marital status, education level, income and level of healthcare insurance) and health status (quality of life, history of smoking and alcohol consumption, health conditions) were measured.



1  
2  
3 *Results:* Of the 266,848 participants, 32.6% reported having taken omega-3 in the 4  
4 weeks prior to the survey. Use of omega-3 fatty acid supplements was higher among  
5 female, non-smokers, non- to mild (alcoholic) drinkers, residing in a major city,  
6  
7 having higher income and private health insurance. Osteoarthritis, osteoporosis,  
8  
9 high cholesterol, and anxiety and/or depression were positively associated with  
10  
11 omega-3 fatty acid supplement use, while cancer and high blood pressure were  
12  
13 negatively associated with use of omega 3 fatty acid supplements.  
14  
15  
16  
17  
18  
19

20  
21 *Conclusions:* This study suggests that a considerable proportion of older Australians  
22  
23 consume omega-3 fatty acid supplements. There is a need for primary healthcare  
24  
25 practitioners to enquire with patients about this supplement use and for work to  
26  
27 ensure provision of good quality information for patients and providers with regards  
28  
29 to omega-3 fatty acid products.  
30  
31  
32  
33  
34  
35  
36  
37  
38  
39  
40  
41  
42  
43  
44  
45  
46  
47  
48  
49  
50  
51  
52  
53  
54  
55  
56  
57  
58  
59  
60

# ARTICLE SUMMARY

## Article Focus

- The use of dietary supplements has increased rapidly in Western societies over past decades.
- Our study examines the use of omega-3 fatty acid supplements amongst older Australians, drawing upon the largest study of healthy ageing undertaken in the Southern Hemisphere (n=266,848).

## Key Messages

- A considerable proportion of older Australians living in New South Wales (32.6%) report using omega-3 fatty acid supplements.
- People with osteoarthritis, osteoporosis, high cholesterol, and anxiety and/or depression were more likely to use omega-3 fatty acid supplements, while people with cancer and high blood pressure were less likely to use omega 3 fatty acid supplements.
- There is a need to ensure provision of good quality information for patients and providers with regards to omega-3 fatty acid supplement products.

## Strengths and Limitations of this Study

- Our study benefits from the use of the largest sample of Australians aged 45 years and older with regards to the consumption of omega-3 fatty acid supplement.

- 1  
2  
3  
4  
5  
6  
7  
8  
9  
10  
11  
12  
13  
14  
15  
16  
17  
18  
19  
20  
21  
22  
23  
24  
25  
26  
27  
28  
29  
30  
31  
32  
33  
34  
35  
36  
37  
38  
39  
40  
41  
42  
43  
44  
45  
46  
47  
48  
49  
50  
51  
52  
53  
54  
55  
56  
57  
58  
59  
60
- The interpretation of our findings is limited by the fact that the use of omega-3 fatty acid supplement was self-reported by the participants and their answers may have been subject to recall bias.

For peer review only

## MAIN TEXT

### **Omega-3 Fatty Acid Supplement Use: An Analysis of 266,848 Australians aged 45 Years and Older**

#### INTRODUCTION

There has been a dramatic increase in the use of dietary supplements in Western industrialized societies over the past few decades. The proportion of American adults using at least one dietary supplement has increased from 42% to 53% between 1994 and 2006.[1] Research also shows the use of dietary supplements is common in European countries such as Denmark (66% of men and 51% of women) and the United Kingdom (48% of women and 36% of men).[2]

In 2007, a national US survey identified omega-3 fatty acid (w3 FA) supplements (products containing docosahexaenoic acid (DHA) and eicosapentaenoic acid (EPA) products) as the first (for adults) and second (for children) most commonly used natural (non-vitamin, non-mineral) product in America.[3] In Australia, a substantial proportion of GPs (80.3%) and community pharmacists (90.2%) recommend omega-3 to patients[4] and findings from this Australian research also identify w3 FA supplement as among the top five complementary and alternative medicines about which healthcare professionals (71.6% of GP and 71.7% of pharmacists) desire better quality information.

1  
2  
3 The clinical evidence base for w3 FA supplement use is varied depending on the  
4 specific condition. There is evidence that w3 FA supplements help in preventing or  
5 benefiting the outcomes of cardiovascular disease with some evidence suggesting a  
6 cholesterol lowering effect.[5-7] However, a meta-analysis study released in 2012  
7 found no relation between use of w3 FA supplements and reduced risk of major  
8 cardiovascular diseases.[8] At present, the National Heart Foundation of Australia  
9 recommends all Australian adults consume about 500 mg (or 1,000 mg for those  
10 who have documented coronary heart disease) of w3 FA per day.[9]

11  
12  
13 Beyond cardiovascular disease, existing research has found no evidence of a  
14 significant association between w3 FA supplement use and reducing cancer  
15 incidence.[10] However, there is some evidence that w3 FA supplements may  
16 improve clinical, biological and quality of life parameters amongst patients with  
17 advanced cancer.[11] There is currently conflicting or insufficient scientific evidence  
18 on the efficacy of w3 FA supplements regarding improvement of mental health  
19 disorders,[12 13] asthma,[14] cystic fibrosis,[15] rheumatoid arthritis, inflammatory  
20 bowel disease and osteoporosis[16] and cognitive functions affected by aging,  
21 dementia, and neurological diseases.[17 18]

22  
23  
24 Given the rise of population ageing and increasing public awareness of the  
25 importance of preventive health,[19] knowledge about consumption of dietary  
26 supplements such as w3 FA is of significance for future health promotion and health  
27 care delivery. In response, this paper describes the findings of the first study to  
28 examine the use of w3 FA supplements in Australia. It aims to provide analysis of the

1  
2  
3 prevalence and characteristics of omega-3 use amongst a large sample of Australians  
4  
5 (n=266,848) aged 45 years and older.  
6  
7  
8  
9

## 10 11 **METHOD**

### 12 13 ***Sample***

14  
15 This research utilised data collected through the 45 and Up Study, which is the  
16  
17 largest study of healthy ageing conducted in the Southern Hemisphere and analyses  
18  
19 data from 266,848 men and women aged 45 and older who reside in the State of New  
20  
21 South Wales, Australia. The 45 and Up study is described in detail elsewhere,[20] but  
22  
23 briefly, individuals aged 45 years and over and resident in New South Wales were  
24  
25 randomly selected from the Medicare Australia database, which provides virtually  
26  
27 complete coverage of the general population. Eligible individuals were mailed an  
28  
29 invitation to take part, an information leaflet, the study questionnaire and consent  
30  
31 form and a reply paid envelope (available at [www.45andUp.org.au](http://www.45andUp.org.au)). Participants  
32  
33 joined the 45 and Up Study by completing the questionnaire and consent form and  
34  
35 mailing them to the Study coordinating centre. The study over-sampled, by a factor  
36  
37 of two, individuals aged 80 years and over and people resided in rural areas; all  
38  
39 residents of remote areas were sampled. The 45 and Up Study sample included  
40  
41 approximately 10% of the general population in the target age range. Recruitment  
42  
43 began in February 2006 and the analyses reported in this paper relate to the 266,848  
44  
45 participants joining the study at the close of December, 2009. The overall response  
46  
47 rate to the mailed invitations to join the study is estimated to be 17.9%, however, the  
48  
49 exact response rate is difficult to specify as some people may not have received the  
50  
51 invitation if their address details were incorrect in the Medicare Australia  
52  
53  
54  
55  
56  
57  
58  
59  
60

1  
2  
3 database.[20] The 45 and Up study sample has excellent heterogeneity and is  
4  
5 reasonably representative of the (State of) New South Wales population; has a  
6  
7 response rate comparable to similar studies internationally and in Australia; and is  
8  
9 among the most representative large scale cohort studies in the world.[21] The 45  
10  
11 and Up Study received ethics approval from the University of New South Wales  
12  
13 Human Research Ethics Committee.  
14

### 15 16 17 18 19 ***Use of Omega-3***

20  
21 Participants were defined as being an w3 FA supplement user if they answered 'yes'  
22  
23 to the following question: 'In the past 4 weeks have you taken fish oil or Omega-3.'  
24  
25

### 26 27 28 ***Demographic measures***

29  
30 Area of residence was assigned according to the Accessibility Remoteness Index of  
31  
32 Australia Plus score for each participant's postcode. Participants were asked about  
33  
34 their current marital status, highest educational qualification they had completed,  
35  
36 annual household income, and their level of healthcare insurance.  
37  
38

### 39 40 41 ***Health status measures***

42  
43 Participants were asked to rate their overall health and overall quality of life on a  
44  
45 five-point Likert scale. They were also asked about their history of smoking and  
46  
47 amount of alcohol consumption. Participants were provided with a list of diseases  
48  
49 (e.g. osteoarthritis, osteoporosis, asthma, cancer) and asked if they had been treated  
50  
51 for any of the disease in the last month. A positive response to this question for a  
52  
53 particular disease was used to determine if a participant had that disease.  
54  
55  
56  
57  
58  
59  
60

### ***Statistical analyses***

The demographic and health status characteristics of omega-3 users and non-users were compared using chi-square tests. Logistic regression modelling, that included all demographic and health characteristics, was conducted using a backward stepwise method, to parsimoniously predict use of w3 FA supplements. In response to the large sample size and multiple comparisons, a p-value <0.001 was adopted for statistical significance. All analyses were conducted using the statistical software SAS 9.2.

## **RESULTS**

There were 266,846 participants who answered the question regarding consumption of w3 FA supplements, of which 86,939 (32.6%) indicated that they had taken w3 FA supplements in the 4 weeks prior to the survey.

Table 1 reports demographic characteristics of participants by w3 FA supplement use. Use of w3 FA supplements is highest among females compared to males ( $p < 0.0001$ ) and those aged 60-79 years compared to those of other ages ( $p < 0.0001$ ). Use of w3 FA supplements was also higher for those participants: residing in inner regional areas compared to those in outer regional areas ( $p < 0.0001$ ); having a trade, certificate of diploma compared to those with a tertiary education ( $p < 0.0001$ ); having an annual household income of \$20,000-\$69,999 compared to those with higher or lower annual household income ( $p < 0.0001$ ); being widowed, divorced or separated compared to those who are single ( $p < 0.0001$ ); and having private health insurance compared to those with no private health insurance ( $p < 0.0001$ ).



1  
2  
3  
4  
5 INSERT TABLE 1 HERE  
6  
7  
8

9  
10 Table 2 shows health status characteristics of participants by w3 FA supplement use.  
11 Use of w3 FA supplements was highest among those participants who never smoked  
12 compared to current smokers ( $p < 0.0001$ ), drank 0-6 alcoholic drinks per week  
13 compared to those who drank  $\leq 21$  alcoholic drinks per week ( $p < 0.0001$ ), and whose  
14 overall health and quality of life were rated as being excellent, very good, or good  
15 compared to those whose overall health and quality of life were rated as fair or poor  
16 ( $p < 0.0001$ ). Participants who reported being treated for osteoarthritis ( $p < 0.0001$ ),  
17 osteoporosis ( $p < 0.0001$ ), asthma ( $p < 0.0001$ ), high blood pressure ( $p < 0.0001$ ), high  
18 cholesterol ( $p < 0.0001$ ), and thyroid problems ( $p < 0.0001$ ) were all higher users of  
19 omega-3 compared to those people who did not have these respective illnesses.  
20 Conversely, participants who reported being treated for cancer ( $p < 0.0001$ ), or did  
21 not report being treated for anxiety or depression ( $p < 0.0001$ ) were lower users of  
22 omega-3 compared to those who had not been treated for these conditions.  
23  
24  
25  
26  
27  
28  
29  
30  
31  
32  
33  
34  
35  
36  
37  
38  
39

40 INSERT TABLE 2 HERE  
41  
42  
43  
44

45 The result of the multiple logistic regression modelling is presented in Table 3. Of all  
46 the diseases examined osteoarthritis, osteoporosis, high cholesterol, and anxiety  
47 and/or depression were positively associated with use of w3 FA supplements, while  
48 cancer and high blood pressure were negatively associated with the use of omega-3.  
49 That is, the odds of w3 FA supplement use was 1.65 (99% CI: 1.55, 1.76) times greater  
50 for those participants reporting treatment for osteoarthritis compared to those  
51  
52  
53  
54  
55  
56  
57  
58  
59  
60

1  
2  
3 without osteoarthritis. The odds of omega-3 use was 1.09 (99% CI: 1.01, 1.18) times  
4  
5 greater for those participants reporting osteoporosis compared to those without  
6  
7 osteoporosis. In comparison to participants reporting treatment for anxiety or  
8  
9 depression, those participants with anxiety only or both anxiety and depression were  
10  
11 1.16 (99% CI: 1.01, 1.34) and 1.19 (99% CI: 1.07, 1.32) times more likely to use w3 FA  
12  
13 supplements, respectively. Those participants reporting treatment for high  
14  
15 cholesterol were 1.23 (99% CI: 1.17, 1.29) times more likely to use omega-3 compared  
16  
17 to those without high cholesterol. The odds of w3 FA supplement use was 0.89 (99%  
18  
19 CI: 0.80, 0.99) and 0.95 (99% CI: 0.91, 0.99) times lower for those participants  
20  
21 reporting treatment for cancer and high blood pressure, respectively.  
22  
23  
24  
25  
26

27 INSERT TABLE 3 HERE  
28  
29  
30

31 Table 3 also shows that those participants who rated their overall health to be fair or  
32  
33 poor were 0.82 (99% CI: 0.77, 0.86) less likely to use omega-3. In comparison to  
34  
35 current smokers, participants who were former smokers (OR=1.66; 99% CI: 1.53,  
36  
37 1.79) or never smoked (OR=1.56; 99% CI: 1.44, 1.69) were more likely to use w3 FA  
38  
39 supplements. In comparison to those participants who drank 0-6 alcoholic drinks  
40  
41 per week, participants who drank 14-20 alcoholic drinks (OR=0.94; 99% CI: 0.89,  
42  
43 1.00) or  $\geq 21$  alcoholic drinks (OR=0.83; 99% CI: 0.78, 0.89) were less likely to use  
44  
45 w3 FA supplements. Participants with no health insurance were 0.84 (99% CI: 0.80,  
46  
47 0.89) times less likely to use w3 FA supplements compared to participants with  
48  
49 private health insurance. In terms of household income, the odds of w3 FA  
50  
51 supplement use were 1.14 (99% CI: 1.08, 1.20) and 1.13 (99% CI: 1.06, 1.21) greater  
52  
53 for participants with an income of \$20,000-\$49,999 and \$50,000-\$69,999  
54  
55  
56  
57  
58  
59  
60

1  
2  
3 respectively, compared to those with an income of <\$20,000. In comparison to those  
4  
5 participants who live in a major city, the odds of w3 FA supplement use are less for  
6  
7 those living in outer regional areas (OR=0.89; 99% CI: 0.85, 0.93) and remote or  
8  
9 very remote areas (OR=0.86; 99% CI: 0.75, 0.98). In comparison to those  
10  
11 participants aged 45-49 years, all other age groups have greater odds of w3 FA  
12  
13 supplement use, with the highest being those aged 60-69 (OR=1.84; 99% CI: 1.73,  
14  
15 1.96) and 70-79 (OR=1.76; 99% CI: 1.64, 1.90) years. In terms of gender, the odds of  
16  
17 w3 FA supplement use was 1.42 (99% CI: 1.36, 1.52) times greater for female  
18  
19 participants.  
20  
21  
22  
23  
24  
25  
26

## 27 **DISCUSSION**

28  
29 Our study, drawing upon the largest database with regards to w3 FA supplement use  
30  
31 to date and constituting the first analyses of the profile of users and prevalence of use  
32  
33 of w3 FA supplements in Australia, shows 32.6% of the study participants, aged 45  
34  
35 years and older, consume w3 FA supplements. This finding identifies w3 FA  
36  
37 supplements as one of the most commonly used dietary supplements amongst older  
38  
39 Australians and is in line with previous research showing w3 FA supplements as  
40  
41 among the top five complementary and alternative medicines recommended by  
42  
43 Australian general practitioners and community pharmacists.[4] The discovery of  
44  
45 such a high level of w3 FA supplement use amongst older Australians suggests that  
46  
47 further research is needed to explore consumer behaviors and decision-making  
48  
49 regarding w3 FA supplement use alongside assessing the possible health impacts of  
50  
51 such consumption.  
52  
53  
54  
55  
56  
57  
58  
59  
60

1  
2  
3 Overall, the findings of association between being female, of increased age, having  
4 advanced education *and* higher use of w3 FA supplements are congruent with factors  
5 predicting broader complementary and alternative medicine use.[3 22] The  
6  
7 association of w3 FA supplement use with higher annual income and private health  
8 insurance highlights the potential importance of cost of w3 FA supplement products  
9 with regards to consumption and this issue warrants further investigation. It is also  
10 important to note that w3 FA supplements, like many complementary and  
11 alternative medicine products more generally, is not currently subsidised by the  
12 Australian Pharmaceutical Benefits Scheme (a Federal government program  
13 providing subsidised prescription drugs to residents) and attracts a further 10%  
14 goods and services tax that prescription medicines do not. As such, cost issues  
15 associated with w3 FA supplementation may be more focused in our Australian  
16 population. Our finding of a positive association of w3 FA supplement use with  
17 higher annual income may also relate to the suggestion that socioeconomic status  
18 acts as a protective factor in health, with those having better life chances more likely  
19 to adopt self-care measures to maintain their health and quality of life.[23]  
20  
21  
22  
23  
24  
25  
26  
27  
28  
29  
30  
31  
32  
33  
34  
35  
36  
37  
38  
39

40 The low use of w3 FA supplements among participants resident in rural and remote  
41 areas compared to those respondents living in metropolitan locations contradicts the  
42 findings of previous research which show higher CAM use in rural areas in  
43 Australia.[24] However, it does reflect findings from some national and international  
44 studies which suggest lower rates of *commercial* or *pre-packaged* CAM product use  
45 amongst some rural populations, when compared to their urban counterparts, which  
46 may be associated with reduced access to these supplements. [24] Indeed, the urban-  
47 rural divide in the use of complementary and alternative medicine is an issue that  
48  
49  
50  
51  
52  
53  
54  
55  
56  
57  
58  
59  
60

1  
2  
3 has received much attention in recent years[24-26] and the results from our study  
4  
5 help add to the evidence-base and discussion of this important health service issue  
6  
7 and highlight the need for further investigation into the complexities of regional  
8  
9 variation in supplement use.  
10

11  
12  
13  
14 The variations in the association of w3 FA supplement use with a range of clinical  
15  
16 conditions are noteworthy, especially given the current varied clinical evidence-base  
17  
18 of w3 FA supplements. The finding of low w3 FA supplement use amongst people  
19  
20 with cancer is not unexpected as research evidence suggests no association between  
21  
22 w3 FA supplements and reducing cancer incidence.[10] Additionally, external factors  
23  
24 may also result in lower omega-3 supplement use amongst people with cancer:  
25  
26 patients may relinquish their CAM use when their use of other forms of medical  
27  
28 treatment increases;[27] or patients may be advised to cease all other medications  
29  
30 when undergoing cancer treatment.[28] However, it is somewhat surprising that  
31  
32 high blood pressure is negatively associated with the use of w3 FA supplement as  
33  
34 there is evidence that omega-3 has beneficial effects in the context of cardiovascular  
35  
36 disease and in lowering blood pressure.[29] This is an area worthy of further  
37  
38 empirical investigation.  
39  
40  
41  
42  
43

44  
45 The association of higher w3 FA supplement use with diseases such as osteoarthritis,  
46  
47 osteoporosis, anxiety and/or depression is interesting given there is currently either  
48  
49 conflicting or insufficient evidence on the efficacy of W3 FA supplements in  
50  
51 addressing these conditions – this suggests there may currently exist a mismatch  
52  
53 between clinical evidence and consumers' perceptions of evidence and benefits  
54  
55 regarding w3 FA supplement use. Together, these study findings highlight the  
56  
57  
58  
59  
60

1  
2  
3 potential need for nutrition guidelines for w3 FA supplement intake and consumer  
4 awareness of the use of w3 FA supplements as well as possible enhanced information  
5 and labeling of relevant products in Australia. The study findings also add weight to  
6 recently identified evidence illustrating a desire for good quality information about  
7 w3 FA supplement products amongst GPs and pharmacists.[4]  
8  
9  
10  
11  
12

13  
14  
15  
16 The finding that respondents with better quality of life/health ratings or a healthy  
17 lifestyle (e.g. non-smoking and/or having less alcoholic drinks) have greater odds of  
18 w3 FA supplement use may indicate that w3 FA supplements are used for both the  
19 treatment of specific health conditions and as a preventive therapy. Previous  
20 research suggests that this distinction between therapeutic and preventive use also  
21 exists for complementary and alternative medicine consumption more broadly.[30]  
22  
23 Given these results, it would be useful for future studies to differentiate between  
24 these two approaches (therapeutic and preventive use) to use and to provide critical,  
25 in-depth examination of patients' motivations and understandings regarding  
26 consumption of w3 FA supplements and other CAM or dietary supplements.  
27  
28  
29  
30  
31  
32  
33  
34  
35  
36  
37  
38  
39

40 The interpretation of our findings is limited by the fact that the association between  
41 w3 FA supplement consumption with particular health conditions does not  
42 necessarily imply that w3 FA supplements have been used specifically for these  
43 conditions. In addition, the disease variable used from the 45 and Up Study survey  
44 was based on individuals reporting that they had been 'treated in last month' rather  
45 than 'ever been diagnosed' and that health, w3 FA supplement use and health care  
46 use is self-reported by the participants. As such our study results may be subject to  
47 recall bias and we may have missed some participants who had a disease but were  
48  
49  
50  
51  
52  
53  
54  
55  
56  
57  
58  
59  
60

1  
2  
3 not treated for it in the month prior to being surveyed. Currently this study focuses  
4 solely on the use of W3 FA supplements, and this research may have benefitted by  
5 including an analysis of usual dietary intake (e.g. food frequency questionnaire), in  
6 particular the consumption of omega 3 rich foods such as oily fish that may be also  
7 be consumed for therapeutic benefit. Given the sample of 45 and Up Study was  
8 drawn from the State of New South Wales, generalisation of the findings of this  
9 research to other parts of Australia should be treated with caution. Finally, as the  
10 statistical tests used in our analyses are influenced by sample size, the very large  
11 sample size in this study can make small difference appear to be significant. As such,  
12 readers need to take into account the absolute differences when interpreting the odds  
13 ratios. Nevertheless, these limitations are countered by the insights gained from  
14 analysing data from the largest sample of adults aged 45 years and older with regards  
15 to their consumption of w3 FA supplements.  
16  
17  
18  
19  
20  
21  
22  
23  
24  
25  
26  
27  
28  
29  
30  
31  
32  
33  
34  
35

## 36 **CONCLUSION**

37  
38 W3 FA supplements are consumed for a wide variety of purposes by a considerable  
39 proportion of Australians aged 45 years and over. In the context of these study  
40 findings there is a need for primary health care practitioners to enquire with their  
41 patients about their use of w3 FA supplements as well as for further work to ensure  
42 provision of good quality information for patients and providers with regards to w3  
43 FA products.  
44  
45  
46  
47  
48  
49  
50  
51  
52  
53  
54  
55  
56  
57  
58  
59  
60

**Table 1 Demographic characteristic of people aged 45 years and older by w3 FA supplement use**

| Demographic Characteristics    | Use of w3 FA supplements |             | p-value |
|--------------------------------|--------------------------|-------------|---------|
|                                | Yes                      | No          |         |
|                                | (n=86,939)               | (n=179,907) |         |
|                                | % (SE)                   | % (SE)      |         |
| <b>Sex</b>                     |                          |             |         |
| Female                         | 60 (0.2)                 | 51 (0.1)    | <0.0001 |
| Male                           | 40 (0.2)                 | 49 (0.1)    |         |
| <b>Age (years)</b>             |                          |             |         |
| 45-49                          | 10 (0.1)                 | 14 (0.1)    | <0.0001 |
| 50-59                          | 32 (0.2)                 | 34 (0.1)    |         |
| 60-69                          | 32 (0.2)                 | 26 (0.1)    |         |
| 70-79                          | 17 (0.1)                 | 15 (0.1)    |         |
| 80+                            | 9 (0.1)                  | 11 (0.1)    |         |
| <b>Place of Residence</b>      |                          |             |         |
| Major city                     | 45 (0.2)                 | 45 (0.1)    | <0.0001 |
| Inner regional                 | 36 (0.2)                 | 35 (0.1)    |         |
| Outer regional                 | 17 (0.1)                 | 18 (0.1)    |         |
| Remote/very remote             | 2 (0.1)                  | 2 (0.1)     |         |
| <b>Education</b>               |                          |             |         |
| School Certificate or less     | 34 (0.2)                 | 34 (0.1)    | 0.0001  |
| Higher School Certificate      | 10 (0.1)                 | 10 (0.1)    |         |
| Trade/certificate/diploma      | 33 (0.2)                 | 32 (0.1)    |         |
| Tertiary                       | 23 (0.1)                 | 24 (0.1)    |         |
| <b>Annual Household Income</b> |                          |             |         |
| < \$20000                      | 25 (0.1)                 | 25 (0.1)    | <0.0001 |
| \$20000-\$49999                | 33 (0.2)                 | 31 (0.1)    |         |
| \$50000-\$69999                | 14 (0.1)                 | 13 (0.1)    |         |



|                       |                      |          |          |         |
|-----------------------|----------------------|----------|----------|---------|
|                       | ≥ \$70000            | 28 (0.2) | 31 (0.1) |         |
| <b>Marital Status</b> | Married/defacto      | 75 (0.1) | 75 (0.1) | <0.0001 |
|                       | Widow/divorce/separ. | 20 (0.1) | 19 (0.1) |         |
|                       | Single               | 5 (0.1)  | 6 (0.1)  |         |
| <b>Health</b>         | Private              | 55 (0.2) | 53 (0.1) | <0.0001 |
| <b>Insurance</b>      | DVA or HCC           | 30 (0.2) | 29 (0.1) |         |
|                       | None                 | 15 (0.1) | 18 (0.1) |         |

---

\* SE = Standard Error

**Table 2 Health status characteristics of people aged 45 years and older by w3 FA supplement use**

| Health Status Characteristics  | Use of w3 FA supplements |             | p-value |
|--------------------------------|--------------------------|-------------|---------|
|                                | Yes                      | No          |         |
|                                | (n=86,939)               | (n=179,907) |         |
|                                | % (SE)                   | % (SE)      |         |
| <b>Smoking Status</b>          |                          |             |         |
| Current smoker                 | 5 (0.1)                  | 8 (0.1)     | <0.0001 |
| Former smoker                  | 36 (0.2)                 | 35 (0.1)    |         |
| Never smoked                   | 59 (0.2)                 | 56 (0.1)    |         |
| <b>Alcohol Consumption</b>     |                          |             |         |
| 0-6 drinks per week            | 64 (0.2)                 | 62 (0.1)    | <0.0001 |
| 7-13 drinks per week           | 19 (0.1)                 | 19 (0.1)    |         |
| 14-20 drinks per week          | 11 (0.1)                 | 11 (0.1)    |         |
| ≥ 21 drinks per week           | 6 (0.1)                  | 8 (0.1)     |         |
| <b>Overall Health</b>          |                          |             |         |
| Excellent/very good/good       | 87 (0.1)                 | 85 (0.1)    | <0.0001 |
| Fair/poor                      | 13 (0.1)                 | 15 (0.1)    |         |
| <b>Overall Quality Of Life</b> |                          |             |         |
| Excellent/very good/good       | 90 (0.1)                 | 89 (0.1)    | <0.0001 |
| Fair/poor                      | 10 (0.1)                 | 11 (0.1)    |         |
| <b>Osteoarthritis</b>          |                          |             |         |
| Yes                            | 11 (0.1)                 | 7 (0.1)     | <0.0001 |
| No                             | 89 (0.1)                 | 93 (0.1)    |         |
| <b>Osteoporosis</b>            |                          |             |         |
| Yes                            | 7 (0.1)                  | 5 (0.1)     | <0.0001 |
| No                             | 93 (0.1)                 | 95 (0.1)    |         |

|                                 |                 |          |          |         |
|---------------------------------|-----------------|----------|----------|---------|
| <b>Asthma</b>                   | Yes             | 5 (0.1)  | 4 (0.1)  | <0.0001 |
|                                 | No              | 95 (0.1) | 96 (0.1) |         |
| <b>Cancer</b>                   | Yes             | 2 (0.1)  | 3 (0.1)  | <0.0001 |
|                                 | No              | 98 (0.1) | 97 (0.1) |         |
| <b>High Blood Pressure</b>      | Yes             | 26 (0.1) | 24 (0.1) | <0.0001 |
|                                 | No              | 74 (0.1) | 76 (0.1) |         |
| <b>High Cholesterol</b>         | Yes             | 17 (0.1) | 14 (0.1) | <0.0001 |
|                                 | No              | 83 (0.1) | 86 (0.1) |         |
| <b>Heart Attack or Angina</b>   | Yes             | 3 (0.1)  | 3 (0.1)  | 0.2996  |
|                                 | No              | 97 (0.1) | 97 (0.1) |         |
| <b>Other Heart Disease</b>      | Yes             | 3 (0.1)  | 3 (0.1)  | 0.6606  |
|                                 | No              | 97 (0.1) | 97 (0.1) |         |
| <b>Thyroid Problems</b>         | Yes             | 6 (0.1)  | 5 (0.1)  | <0.0001 |
|                                 | No              | 94 (0.1) | 95 (0.1) |         |
| <b>Anxiety &amp; Depression</b> | Neither         | 91 (0.1) | 92 (0.1) | <0.0001 |
|                                 | Depression only | 4 (0.1)  | 4 (0.1)  |         |
|                                 | Anxiety only    | 2 (0.1)  | 1 (0.1)  |         |
|                                 | Both            | 3 (0.1)  | 3 (0.1)  |         |

---

\* SE = Standard Error

**Table 3 Multiple logistic regression model for predicting use of w3 FA supplements in people aged 45 years and older**

| <b>Factor</b>                  |                    | <b>Odds Ratio</b> | <b>99% C.I.</b> |
|--------------------------------|--------------------|-------------------|-----------------|
| <b>Sex</b>                     | Male               | 1.00              | —               |
|                                | Female             | 1.42              | 1.37, 1.48      |
| <b>Age</b>                     | 45-49              | 1.00              | —               |
|                                | 50-59              | 1.43              | 1.36, 1.52      |
|                                | 60-69              | 1.84              | 1.73, 1.96      |
|                                | 70-79              | 1.76              | 1.64, 1.90      |
|                                | 80+                | 1.32              | 1.21, 1.44      |
| <b>Place of Residence</b>      | Major city         | 1.00              | —               |
|                                | Inner regional     | 0.98              | 0.95, 1.02      |
|                                | Outer regional     | 0.89              | 0.85, 0.93      |
|                                | Remote/very remote | 0.86              | 0.75, 0.98      |
| <b>Annual Household Income</b> | < \$20000          | 1.00              | —               |
|                                | \$20000-\$49999    | 1.14              | 1.08, 1.20      |
|                                | \$50000-\$69999    | 1.13              | 1.06, 1.21      |
|                                | ≥ \$70000          | 1.03              | 0.97, 1.10      |
| <b>Insurance</b>               | Private            | 1.00              | —               |
|                                | DVA or HCC         | 0.93              | 0.89, 0.98      |
|                                | None               | 0.84              | 0.80, 0.89      |
| <b>Smoking</b>                 | Current smoker     | 1.00              | —               |

|                                 |                          |      |            |
|---------------------------------|--------------------------|------|------------|
| <b>Status</b>                   | Former smoker            | 1.66 | 1.53, 1.79 |
|                                 | Never smoked             | 1.56 | 1.44, 1.69 |
| <b>Alcohol Consumption</b>      | 0-6 drinks per week      | 1.00 | —          |
|                                 | 7-13 drinks per week     | 1.02 | 0.97, 1.07 |
|                                 | 14-20 drinks per week    | 0.94 | 0.89, 1.00 |
|                                 | ≥ 21 drinks per week     | 0.83 | 0.78, 0.89 |
| <b>Overall Health</b>           | Excellent/very good/good | 1.00 | —          |
|                                 | Fair/poor                | 0.82 | 0.77, 0.86 |
| <b>Osteoarthritis</b>           | No                       | 1.00 | —          |
|                                 | Yes                      | 1.65 | 1.55, 1.76 |
| <b>Osteoporosis</b>             | No                       | 1.00 | —          |
|                                 | Yes                      | 1.09 | 1.01, 1.18 |
| <b>Cancer</b>                   | No                       | 1.00 | —          |
|                                 | Yes                      | 0.89 | 0.80, 0.99 |
| <b>High Blood Pressure</b>      | No                       | 1.00 | —          |
|                                 | Yes                      | 0.95 | 0.91, 0.99 |
| <b>High Cholesterol</b>         | No                       | 1.00 | —          |
|                                 | Yes                      | 1.23 | 1.17, 1.29 |
| <b>Anxiety &amp; Depression</b> | Neither                  | 1.00 | —          |
|                                 | Depression only          | 1.01 | 0.92, 1.11 |
|                                 | Anxiety only             | 1.16 | 1.01, 1.34 |
|                                 | Both                     | 1.19 | 1.07, 1.32 |

1  
2  
3  
4  
5  
6  
7  
8  
9  
10  
11  
12  
13  
14  
15  
16  
17  
18  
19  
20  
21  
22  
23  
24  
25  
26  
27  
28  
29  
30  
31  
32  
33  
34  
35  
36  
37  
38  
39  
40  
41  
42  
43  
44  
45  
46  
47  
48  
49  
50  
51  
52  
53  
54  
55  
56  
57  
58  
59  
60

## Glossary

|                    |                                        |
|--------------------|----------------------------------------|
| CAM                | Complementary and alternative medicine |
| DHA                | Docosahexaenoic acid                   |
| EPA                | Eicosapentaenoic acid                  |
| GP                 | General Practitioner                   |
| Omega-3 Fatty Acid | w3 FA                                  |

For peer review only

## ACKNOWLEDGEMENTS

We thank the men and women participating in the 45 and Up Study. The 45 and Up study is managed by the Sax Institute in collaboration with major partner Cancer Council New South Wales, and partners: the National Heart Foundation of Australia (NSW Division); NSW Health; *beyondblue: the national depression initiative*; Ageing, Disability and Home Care, Department of Human Services NSW; and UnitingCare Ageing.

## COMPETING INTERESTS

None.

## FUNDING

This research received no specific grant from any funding agency in the public, commercial or not-for-profit sectors.

## AUTHORS CONTRIBUTION

All authors devised the study and helped to conceptualize ideas, interpret findings, manuscript writing and reviewing drafts of the article. JA and DS acquired the data from the 45 and Up Study. DS undertook data analysis and JA, DS, CL, AB, JW

1  
2  
3 contributed to the interpretation of the data. All authors read and approved the final  
4  
5 manuscript.  
6  
7  
8  
9  
10

## 11 **DATA SHARING STATEMENT**

12  
13  
14  
15 There are no additional data available.  
16  
17  
18  
19  
20  
21  
22  
23  
24  
25  
26  
27  
28  
29  
30  
31  
32  
33  
34  
35  
36  
37  
38  
39  
40  
41  
42  
43  
44  
45  
46  
47  
48  
49  
50  
51  
52  
53  
54  
55  
56  
57  
58  
59  
60



## REFERENCES

1. Gahche J, Bailey R, Burt V, et al. Dietary Supplement Use Among U.S. Adults Has Increased Since NHANES III (1988–1994). NCHS Data Brief. Atlanta: Centers for Disease Control and Prevention, 2011:1-8.
2. Skeie G, Braaten T, Hjartåker A, et al. Use of dietary supplements in the European Prospective Investigation into Cancer and Nutrition calibration study. *Eur J Clin Nutr* 2009;**63**:226-38
3. Barnes PM, Bloom B, Nahin RL. Complementary and Alternative Medicine Use Among Adults and Children: United States, 2007 Hyattsville: U.S. Department of Health and Human Services, Division of Health Interview Statistics, Centers for Disease Control and Prevention, National Center for Health Statistics, 2008.
4. Brown J, Morgan T, Adams J, et al. Complementary Medicines Information Use and Needs of Health Professionals: General Practitioners and Pharmacists. Sydney: National Prescribing Service, 2008.
5. Chowdhury R, Stevens S, Gorman D, et al. Association between fish consumption, long chain omega 3 fatty acids, and risk of cerebrovascular disease: Systematic review and meta-analysis. *BMJ* 2012;**345**(e6698)
6. Filion KB, El Khoury F, Bielinski M, et al. Omega-3 fatty acids in high-risk cardiovascular patients: a meta-analysis of randomized controlled trials. *BMC Cardiovasc Disord* 2010;**10**(24)
7. Kromhout D, Yasuda S, Geleijnse JM, et al. Fish oil and omega-3 fatty acids in cardiovascular disease: do they really work? *European Heart Journal* 2012;**33**:436–43
8. Rizos EC, Ntzani EE, Bika E, et al. Association between omega-3 fatty acid supplementation and risk of major cardiovascular disease events: a systematic review and meta-analysis. *JAMA* 2012;**308**(10):1024-33
9. National Heart Foundation of Australia. Position Statement: Fish, Fish Oils, n-3 Polyunsaturated Fatty Acids and Cardiovascular Health. Sydney: National Heart Foundation of Australia, 2008.

10. MacLean CH, Newberry SJ, Mojica WA, et al. Effects of omega-3 fatty acids on cancer risk: a systematic review. *JAMA: Journal of the American Medical Association* 2006;**295**(4):403-15
11. Colomera R, Moreno-Nogueiraa JM, García-Lunaa PP, et al. N-3 fatty acids, cancer and cachexia: a systematic review of the literature. *British Journal of Nutrition* 2007;**97**(5):823-31
12. Lin P-Y, Su K-P. A meta-analytic review of double-blind, placebo-controlled trials of antidepressant efficacy of Omega-3 fatty acids. *Journal of Clinical Psychiatry* 2007;**68**(7):1056-61
13. Montgomery P, Richardson AJ. Omega-3 fatty acids for bipolar disorder. *Cochrane Database of Systematic Reviews* 2008(2):Art. No.: CD005169. DOI: 10.1002/14651858.CD005169.pub2
14. Thien FCK, De Luca S, Woods RK, et al. Dietary marine fatty acids (fish oil) for asthma in adults and children. *Cochrane Database of Systematic Reviews* 2002(2):Art. No.: CD001283. DOI: 10.1002/14651858.CD001283
15. Oliver C, Everard M, N'Diaye T. Omega-3 fatty acids (from fish oils) for cystic fibrosis. *Cochrane Database of Systematic Reviews* 2007(4)
16. Agency for Healthcare Research and Quality. Effects of omega-3 fatty acids on lipids and glycemic control in type II diabetes and the metabolic syndrome and on inflammatory bowel disease, rheumatoid arthritis, renal disease, systemic lupus erythematosus, and osteoporosis. Rockville: Agency for Healthcare Research and Quality, 2004.
17. Sydenham E, Dangour AD, Lim W-S. Omega 3 fatty acid for the prevention of cognitive decline and dementia. *Cochrane Database of Systematic Reviews* 2012(6) doi: 10.1002/14651858.CD005379.pub3[published Online First: Epub Date]].
18. James S, Montgomery P, Williams K. Omega-3 fatty acids supplementation for autism spectrum disorders (ASD). *Cochrane Database of Systematic Reviews* 2011(11) doi: 10.1002/14651858.CD007992.pub2[published Online First: Epub Date]].
19. Kickbusch I, Payne L. Twenty-first century health promotion: the public health revolution meets the wellness revolution. *Health Promotion International* 2003;**18**(4):275-78

- 1  
2  
3 20. 45 and Up Study Collaborators. Cohort profile: the 45 and Up Study.  
4 International Journal of Epidemiology 2008;**37**:941-47  
5  
6 21. Mealing N, Banks E, Jorm L, et al. Investigation of relative risk estimates from  
7 studies of the same population with contrasting response rates and designs.  
8 BMC Medical Research Methodology 2010;**10**(26)  
9  
10 22. Adams J, Sibbritt D, Easthope G, et al. The profile of women who consult  
11 alternative health practitioners in Australia. Medical Journal of Australia  
12 2003;**179**:297-300  
13  
14 23. Cockerham WC. Health lifestyles: Bringing structure back. In: Cockerham WC,  
15 ed. The New Blackwell Companion to Medical Sociology. Oxford: Wiley-  
16 Blackwell, 2009:159-83.  
17  
18 24. Wardle J, Lui C-W, Adams J. Complementary and alternative medicine in rural  
19 communities: current research and future directions. Journal of Rural Health  
20 2012;**28**(1):101-12  
21  
22 25. Adams J, Sibbritt D, Lui C-W. The urban-rural divide in complementary and  
23 alternative medicine use: a longitudinal study of 10,638 women. BMC  
24 Complementary and Alternative Medicine 2011;**11**(2)  
25  
26 26. Adams J. Exploring the interface between complementary and alternative  
27 medicine (CAM) and rural general practice: A call for research. Health and  
28 Place 2004;**10**(3):285-87  
29  
30 27. Sibbritt DW, Adams J, Young AF. A longitudinal analysis of mid-age women's use  
31 of complementary and alternative medicine (CAM) in Australia, 1996-1998.  
32 Women Health 2004;**40**(4):41-56  
33  
34 28. Broom A, Adams J. Oncology clinicians' accounts of discussing complementary  
35 and alternative medicine with their patients. Health 2009;**13**(3):317-36  
36  
37 29. Wang C, Harris WS, Chung M, et al. N-3 Fatty acids from fish or fish-oil  
38 supplements, but not alpha-linolenic acid, benefit cardiovascular disease  
39 outcomes in primary- and secondary-prevention studies: a systematic review.  
40 Am J Clin Nutr 2006;**84**(1):5-17  
41  
42 30. Bishop FL, Yardley L, Lewith GT. Treat or treatment - a qualitative study  
43 analyzing patients' use of CAM. American Journal of Public Health  
44 2008;**98**(9):1700-05  
45  
46  
47  
48  
49  
50  
51  
52  
53  
54  
55  
56  
57  
58  
59  
60

1  
2  
3  
4  
5  
6  
7  
8  
9  
10  
11  
12  
13  
14  
15  
16  
17  
18  
19  
20  
21  
22  
23  
24  
25  
26  
27  
28  
29  
30  
31  
32  
33  
34  
35  
36  
37  
38  
39  
40  
41  
42  
43  
44  
45  
46  
47  
48  
49  
50  
51  
52  
53  
54  
55  
56  
57  
58  
59  
60

For peer review only

# TITLE PAGE

**Omega-3 Fatty Acid Supplement Use: A-SecondaryAn Analysis of 266,848  
Australians aged 45 Years and Older**

Jon Adams

Professor, Faculty of Health, University of Technology Sydney, Sydney, Australia

David Sibbritt

Professor, Faculty of Health, University of Technology Sydney, Sydney, Australia

Chi-Wai Lui

Lecturer, School of Population Health, University of Queensland, Brisbane, Australia

Alex Broom

Associate Professor, School of Social Science, University of Queensland, Brisbane,  
Australia

Jonathan Wardle

Research Fellow, Faculty of Health, University of Technology Sydney, Sydney,  
Australia

1  
2  
3  
4  
5  
6  
7 *Correspondence:*

8 Jon Adams

9 Faculty of Health

10 University of Technology Sydney

11 Level 7 Building 10, 235-253 Jones Street

12 Ultimo New South Wales 2007, Australia

13  
14  
15  
16  
17  
18 | Email: [jon.adams@uts.edu.au](mailto:jon.adams@uts.edu.au)

19  
20 | Phone: +61 2 9514 4821

21  
22 | Fax: +61 2 9514 4835

Formatted: Default Paragraph Font

23  
24  
25  
26  
27  
28 **Keywords**

29  
30  
31  
32  
33  
34  
35  
36  
37  
38  
39  
40  
41  
42  
43  
44  
45  
46  
47  
48  
49  
50  
51  
52  
53  
54  
55  
56  
57  
58  
59  
60  
Omega-3, fish oils, dietary supplements, utilization, adult

**Word Count**

| ~~2,362~~3,020 words

## ABSTRACT

*Objective:* There has been a dramatic increase in the use of dietary supplements in Western ~~industrialized~~ societies over the past ~~few~~ decades ~~and our~~. Our understanding of the prevalence ~~and pattern~~ of omega-3 fatty acid supplement consumption is of significance for future nutrition planning, health promotion and ~~health~~ care delivery. However, we know ~~very~~ little about omega-3 fatty acid supplement consumption or users. This paper, drawing upon the largest dataset with regards to omega-3 fatty acid supplement use (n=266,848), examines the use and users of ~~omega-3~~ this supplement amongst a large sample of older Australians living in New South Wales.

Formatted: English (U.S.)

*Design:* Cross-sectional study. ~~A secondary analysis was made of data~~ Data were analysed from the 45 and Up Study ~~that is~~, the largest study of healthy ageing ever undertaken in the Southern Hemisphere.

*Setting:* New South Wales, Australia.

*Participants:* 266,848 participants of the 45 and Up Study.

*Primary and Secondary Outcome Measures:* Participants' use of omega-3, demographics (geographical location, marital status, education level, income and level of healthcare insurance) and health status (quality of life, history of smoking and alcohol consumption, health conditions) were measured.

1  
2  
3  
4  
5  
6  
7  
8  
9  
10  
11  
12  
13  
14  
15  
16  
17  
18  
19  
20  
21  
22  
23  
24  
25  
26  
27  
28  
29  
30  
31  
32  
33  
34  
35  
36  
37  
38  
39  
40  
41  
42  
43  
44  
45  
46  
47  
48  
49  
50  
51  
52  
53  
54  
55  
56  
57  
58  
59  
60

*Results:* Of the 266,848 participants, ~~86,939 (32.6%)~~ reported having taken omega-3 in the 4 weeks prior to the survey. Use of omega-3 fatty acid supplements was higher among female, non-smokers, non- to mild (alcoholic) drinkers, residing in a major city, having higher income and private health insurance. Osteoarthritis, osteoporosis, high cholesterol, and anxiety and/or depression were positively associated with omega-3 fatty acid supplement use, while cancer and high blood pressure were negatively associated with use of omega 3 fatty acid supplements.

Formatted: English (U.S.)

*Conclusions:* This study suggests that a considerable proportion of older Australians consume omega-3 fatty acid supplements. There is a need for primary healthcare practitioners to enquire with patients about ~~omega-3~~this supplement use and for work to ensure provision of good quality information for patients and providers with regards to omega-3 fatty acid products.



## ARTICLE SUMMARY

### Article Focus

- The use of dietary supplements has increased rapidly in Western societies over past decades.
- Our study examines the use of omega-3 [fatty acid supplements](#) amongst older Australians, drawing upon the largest study of healthy ageing undertaken in the Southern Hemisphere (n=266,848).

### Key Messages

- A considerable proportion of older Australians [living in New South Wales](#) (32.6%) report using omega-3 [fatty acid supplements](#).
- ~~Osteoarthritis~~ [People with osteoarthritis](#), osteoporosis, high cholesterol, and anxiety and/or depression ~~are positively associated with~~ [were more likely to use](#) omega-3 ~~use~~ [fatty acid supplements](#), while [people with](#) cancer and high blood pressure ~~are negatively associated with the~~ [were less likely to use](#) ~~of~~ omega 3 [fatty acid supplements](#).
- There is a need to ensure provision of good quality information for patients and providers with regards to omega-3 [fatty acid supplement](#) products.

### Strengths and Limitations of this Study

- Our study benefits from the use of the largest sample of Australians aged 45 years and older with regards to the consumption of omega-3 [fatty acid supplement](#).

1  
2  
3  
4  
5  
6  
7  
8  
9  
10  
11  
12  
13  
14  
15  
16  
17  
18  
19  
20  
21  
22  
23  
24  
25  
26  
27  
28  
29  
30  
31  
32  
33  
34  
35  
36  
37  
38  
39  
40  
41  
42  
43  
44  
45  
46  
47  
48  
49  
50  
51  
52  
53  
54  
55  
56  
57  
58  
59  
60

- The interpretation of our findings is limited by the fact that the use of omega-3 fatty acid supplement was self-reported by the participants and their answers may have been subject to recall bias.

Formatted: English (U.S.)

For peer review only

## MAIN TEXT

### Omega-3 Fatty Acid Supplement Use: A Secondary Analysis of 266,848 Australians aged 45 Years and Older

#### INTRODUCTION

There has been a dramatic increase in the use of dietary supplements in Western industrialized societies over the past few decades. The proportion of American adults using at least one dietary supplement has increased from 42% to 53% between 1994 and 2006<sup>1</sup> and research has shown<sup>2006</sup>.<sup>[1]</sup> Research also shows the use of dietary supplements is common in many European countries, such as Denmark (66% of men and 51% of women) and the United Kingdom (48% of women and 36% of men).<sup>[2]</sup>

Formatted: Not Superscript/ Subscript

In 2007, a national US survey identified omega-3 ~~different types of fish oil fatty acid (w3 FA) supplements~~ (products ~~such as containing~~ docosahexaenoic acid (DHA) and eicosapentaenoic acid (EPA) ~~products~~) as the first (for adults) and second (for children) most commonly used ~~natural~~ (non-vitamin, non-mineral, ~~natural~~) product in America.<sup>[3]</sup> In Australia, a substantial proportion of GPs (80.3%) and community pharmacists (90.2%) recommend omega-3 to ~~patients+patients~~<sup>[4]</sup> and findings from this Australian research also identify ~~omega-3w3 FA supplement~~ as among the top five complementary and alternative medicines about which healthcare professionals (71.6% of GP and 71.7% of pharmacists) desire better quality information.

Formatted: English (U.S.)

Formatted: Not Superscript/ Subscript

1  
2  
3  
4  
5  
6  
7 The clinical evidence base for omega-3w3 FA supplement use is varied depending on  
8 the specific condition. There is evidence that omega-3 helpsw3 FA supplements help  
9 in preventing or benefiting the outcomes of cardiovascular disease<sup>5</sup>disease with some  
10 evidence suggesting a cholesterol lowering effect.~~The~~.<sup>[5-7]</sup> However, a meta-analysis  
11 study released in 2012 found no relation between use of w3 FA supplements and  
12 reduced risk of major cardiovascular diseases.<sup>[8]</sup> At present, the National Heart  
13 Foundation of Australia recommends all Australian adults consume about 500 mg  
14 (or 1,000 mg for those who have documented coronary heart disease) of omega-3  
15 fatty acidsw3 FA per day.<sup>6</sup>.<sup>[9]</sup>

16  
17  
18  
19  
20  
21  
22  
23  
24  
25  
26 Beyond cardiovascular disease, existing research has found no evidence of a  
27 significant association between omega-3w3 FA supplement use and reducing cancer  
28 incidence.<sup>7</sup>.<sup>[10]</sup> However, there is some evidence that omega-3 fatty acidsw3 FA  
29 supplements may improve clinical, biological and quality of life parameters amongst  
30 patients with advanced cancer.<sup>8</sup>.<sup>[11]</sup> There is currently conflicting or insufficient  
31 scientific evidence on the efficacy of omega-3w3 FA supplements regarding  
32 improvement of mental health disorders,<sup>9+9</sup>.<sup>[12 13]</sup> asthma,<sup>11</sup>.<sup>[14]</sup> cystic  
33 fibrosis,<sup>12</sup>.<sup>[15]</sup> rheumatoid arthritis, inflammatory bowel disease and  
34 osteoporosis<sup>13</sup>osteoporosis<sup>[16]</sup> and cognitive functions affected by aging, dementia,  
35 and neurological diseases.<sup>14</sup>.<sup>[17 18]</sup>

36  
37  
38  
39  
40  
41  
42  
43  
44  
45  
46 In recent years the international public health agenda has partly focused on seeking  
47 cost-effective strategies to improve public health nutrition<sup>15</sup> and in Australia, the  
48 Federal Government indicated its commitment to the establishment of a  
49 comprehensive National Food and Nutrition Framework and to the importance of  
50  
51  
52  
53  
54

1  
2  
3  
4  
5  
6  
7 providing evidence based nutrition and dietary guidelines to the public via the  
8 National Preventive Health Strategy.<sup>16</sup> Furthermore, ~~given~~ Given the rise of  
9 population ageing, and increasing consumer interest in the value of healthy eating,  
10 exercise and nutrition,<sup>17</sup> and growth in public awareness of the importance of  
11 preventive health,<sup>18</sup> ~~empirical analysis of the prevalence and pattern of omega-3,~~ [19]  
12 knowledge about consumption of dietary supplements such as w3 FA is of  
13 significance for future nutrition planning, health promotion and health care delivery.  
14 In response, this paper ~~reports~~ describes the findings of the first study to examine the  
15 use ~~and users of omega-3 of~~ w3 FA supplements in Australia. It aims to provide  
16 analysis of the prevalence and characteristics of omega-3 use amongst a large sample  
17 of ~~older~~ Australians (n=266,848) aged 45 years and older.

Formatted: English (Australia)

Formatted: English (U.S.)

## METHOD

### Sample

31  
32  
33  
34  
35 This research utilised data collected through the 45 and Up Study, which is the  
36 largest study of healthy ageing conducted in the Southern Hemisphere and analyses  
37 data from ~~over 265,000~~ 266,848 men and women aged 45 and older who reside in  
38 the State of New South Wales, Australia. The 45 and Up study is described in detail  
39 elsewhere,<sup>19</sup> [20] but briefly ~~participants, individuals aged 45 years and over and~~  
40 resident in New South Wales were randomly selected from the Medicare Australia  
41 database, which provides virtually complete coverage of the general population.  
42  
43 ~~Participants joined the 45 and Up study by completing a postal questionnaire and~~  
44 ~~providing written consent for follow-up.~~ Eligible individuals were mailed an  
45 invitation to take part, an information leaflet, the study questionnaire and consent  
46  
47  
48  
49  
50  
51  
52  
53  
54

1  
2  
3  
4  
5  
6  
7 form and a reply paid envelope (available at [www.45andUp.org.au](http://www.45andUp.org.au)). Participants  
8 joined the 45 and Up Study by completing the questionnaire and consent form and  
9 mailing them to the Study coordinating centre. The study over-sampled, by a factor  
10 of two, individuals aged 80 years and over and people resided in rural areas; all  
11 residents of remote areas were sampled. The 45 and Up Study sample included  
12 approximately 10% of the general population in the target age range. Recruitment  
13  
14  
15  
16  
17  
18 began in February 2006 and the analyses reported in this paper relate to the 266,848  
19  
20 participants joining the study at the close of December, 2009. The overall response  
21 rate to the mailed invitations to join the study is estimated to be 17.9%, however, the  
22 exact response rate is difficult to specify as some people may not have received the  
23 invitation if their address details were incorrect in the Medicare Australia  
24 database.[20] The 45 and Up study sample has excellent heterogeneity and is  
25 reasonably representative of the (State of) New South Wales population; has a  
26 response rate comparable to similar studies internationally and in Australia; and is  
27 among the most representative large scale cohort studies in the world.[21] The 45  
28  
29 and Up Study received ethics approval from the University of New South Wales  
30  
31  
32  
33  
34  
35  
36  
37  
38  
39  
40  
41  
42  
43  
44  
45  
46  
47  
48  
49  
50  
51  
52  
53  
54  
55  
56  
57  
58  
59  
60

Formatted

### ***Use of Omega-3***

Participants were defined as being an omega-3w3 FA supplement user if they  
answered 'yes' to the following question: 'In the past 4 weeks have you taken fish oil  
or Omega-3.'

Formatted: English (U.S.)

### ***Demographic measures***

1  
2  
3  
4  
5  
6  
7 Area of residence was assigned according to the Accessibility Remoteness Index of  
8  
9 Australia Plus score for each participant's postcode. Participants were asked about  
10 their current marital status, highest educational qualification they had completed,  
11 annual household income, and their level of healthcare insurance.  
12  
13

### 14 15 16 ***Health status measures***

17  
18 Participants were asked to rate their overall health and overall quality of life on a  
19 five-point Likert scale. They were also asked about their history of smoking and  
20 amount of alcohol consumption. Participants were provided with a list of diseases  
21 (e.g. osteoarthritis, osteoporosis, asthma, cancer) and asked if they had been treated  
22 for any of the disease in the last month. A positive response to this question for a  
23 particular disease was used to determine if a participant had that disease.  
24  
25  
26  
27  
28  
29

### 30 31 ***Statistical analyses***

32  
33 The demographic and health status characteristics of omega-3 users and non-users  
34 were compared using chi-square tests. Logistic regression modelling, that included  
35 all demographic and health ~~status~~-characteristics ~~variables~~, was conducted using a  
36 backward stepwise method, to parsimoniously predict use of ~~omega-3-w3 FA~~  
37 supplements. In response to the large sample size and multiple comparisons, a p-  
38 value ~~<0.005001~~ was adopted for statistical significance. All analyses were conducted  
39 using the statistical software SAS 9.2.  
40  
41  
42  
43  
44  
45  
46  
47  
48  
49

## 50 **RESULTS**

1  
2  
3  
4  
5  
6  
7 There were 266,846 participants who answered the question regarding consumption  
8 of ~~omega-3w3 FA supplements~~, of which 86,939 (32.6%) indicated that they had  
9 taken ~~omega-3w3 FA supplements~~ in the 4 weeks prior to the survey.

Formatted: English (U.S.)

14 ~~A comparison between participants who used omega-3 and those who did not use~~  
15 ~~omega-3 by Table 1 reports~~ demographic characteristics ~~is provided in Table 1. Use of~~  
16 ~~omega-3 participants by w3 FA supplement use. Use of w3 FA supplements~~ is highest  
17 among females ~~compared to males~~ ( $p < 0.0001$ ) and those aged 60-79 years ~~compared~~  
18 ~~to those of other ages~~ ( $p < 0.0001$ ). Use of ~~omega-3w3 FA supplements~~ was also  
19 higher for those participants: residing in inner regional areas ~~compared to those in~~  
20 ~~outer regional areas~~ ( $p < 0.0001$ ); having a trade, certificate of diploma ~~compared to~~  
21 ~~those with a tertiary education~~ ( $p < 0.0001$ ); having an annual household income of  
22 \$20,000-\$69,999 ~~compared to those with higher or lower annual household income~~  
23 ( $p < 0.0001$ ); being widowed, divorced or separated ~~compared to those who are single~~  
24 ( $p < 0.0001$ ); and having private health insurance ~~compared to those with no private~~  
25 ~~health insurance~~ ( $p < 0.0001$ ).  
26  
27  
28  
29  
30  
31  
32  
33  
34  
35  
36

Formatted: English (U.S.)

Formatted: English (U.S.)

37  
38  
39 INSERT TABLE 1 HERE  
40  
41  
42

43 Table 2 shows ~~a comparison between participants who used omega-3 and those who~~  
44 ~~did not use omega-3 by~~ health status characteristics ~~of participants by w3 FA~~  
45 ~~supplement use. Use of omega-3w3 FA supplements~~ was highest among those  
46 participants who never smoked ~~compared to current smokers~~ ( $p < 0.0001$ ), drank 0-6  
47 ~~alcoholic drinks per week compared to those who drank  $\leq 21$~~  alcoholic drinks per  
48 week ( $p < 0.0001$ ), and whose overall health and quality of life were rated as being  
49  
50  
51  
52  
53  
54

Formatted: English (U.S.)



1  
2  
3  
4  
5  
6  
7 excellent, very good, or good (~~p<0.0001~~), compared to those whose overall health and  
8 quality of life were rated as fair or poor (p<0.0001). Participants who reported being  
9 treated for osteoarthritis (p<0.0001), osteoporosis (p<0.0001), asthma (p<0.0001),  
10 high blood pressure (p<0.0001), high cholesterol (p<0.0001), and thyroid problems  
11 (p<0.0001) were all higher users of omega-3, compared to those people who did not  
12 have these respective illnesses. Conversely, participants who reported being treated  
13 for cancer (p<0.0001), or did not report being treated for anxiety or depression  
14 (p<0.0001) were lower users of omega-3, compared to those who had not been  
15 treated for these conditions.

16  
17  
18  
19  
20  
21  
22  
23  
24  
25  
26 INSERT TABLE 2 HERE

27  
28  
29 The result of the multiple logistic regression modelling is presented in Table 3. Of all  
30 the diseases examined osteoarthritis, osteoporosis, high cholesterol, and anxiety  
31 and/or depression were positively associated with use of ~~omega-3w3 FA~~  
32 supplements, while cancer and high blood pressure were negatively associated with  
33 the use of omega-3. That is, the odds of ~~omega-3w3 FA supplement~~ use was 1.65  
34 (~~9599% CI: 1.5955, 1.7276~~) times greater for those participants reporting treatment  
35 for osteoarthritis compared to those without osteoarthritis. The odds of omega-3 use  
36 was 1.09 (~~9599% CI: 1.0401, 1.1518~~) times greater for those participants reporting  
37 osteoporosis compared to those without osteoporosis. In comparison to participants  
38 reporting treatment for ~~either~~ anxiety or depression, those participants with anxiety  
39 only or both anxiety and depression were 1.16 (~~9599% CI: 1.01, 1.34~~) and 1.19 (99%  
40 CI: 1.07, 1.26) and 1.19 (95% CI: 1.12, 1.2732) times more likely to use ~~omega-3w3 FA~~  
41 supplements, respectively. Those participants reporting treatment for high  
42  
43  
44  
45  
46  
47  
48  
49  
50  
51  
52  
53

Formatted: English (U.S.)

1  
2  
3  
4  
5  
6  
7 cholesterol were 1.23 (9599% CI: 1.1917, 1.2729) times more likely to use omega-3  
8 compared to those without high cholesterol. The odds of ~~omega-3w3 FA supplement~~  
9 use was 0.89 (9599% CI: 0.8480, 0.9599) and 0.95 (9599% CI: 0.9391, 0.9899)  
10 times lower for those participants reporting treatment for cancer and high blood  
11 pressure, respectively.  
12  
13  
14  
15

16  
17  
18 INSERT TABLE 3 HERE  
19  
20

21  
22 Table 3 also shows that those participants who rated their overall health to be fair or  
23 poor were 0.82 (9599% CI: 0.7977, 0.8486) less likely to use omega-3. In  
24 comparison to current smokers, participants who were former smokers (OR=1.66;  
25 9599% CI: 1.5853, 1.7479) or never smoked (OR=1.56; 9599% CI: 1.4944, 1.6369)  
26 were more likely to use ~~omega-3w3 FA supplements~~. In comparison to those  
27 participants who drank 0-6 alcoholic drinks per week, participants who drank 14-20  
28 alcoholic drinks (OR=0.94; 9599% CI: 0.91, 0.9889, 1.00) or ≥ 21 alcoholic drinks  
29 (OR=0.83; 9599% CI: 0.8078, 0.8789) were less likely to use ~~omega-3-w3 FA~~  
30 ~~supplements~~. Participants with no health insurance were 0.84 (9599% CI: 0.8280,  
31 0.8689) times less likely to use ~~omega-3w3 FA supplements~~ compared to  
32 participants with private health insurance. In terms of household income, the odds of  
33 ~~omega-3w3 FA supplement~~ use were 1.14 (9599% CI: 1.1108, 1.1820) and 1.13  
34 (9599% CI: 1.0906, 1.1821) greater for participants with an income of \$20,000-  
35 \$49,999 and \$50,000-\$69,999 respectively, compared to those with an income of  
36 <\$20,000. In comparison to those participants who live in a major city, the odds of  
37 ~~omega-3w3 FA supplement~~ use are less for those living in outer regional areas  
38 (OR=0.89; 9599% CI: 0.8685, 0.9293) and remote or very remote areas (OR=0.86;  
39  
40

41  
42  
43  
44  
45  
46  
47  
48  
49  
50  
51  
52  
53  
54  
55  
56  
57  
58  
59  
60

Formatted: English (U.S.)

Formatted: English (U.S.)

Formatted: English (U.S.)

Formatted: English (U.S.)

1  
2  
3  
4  
5  
6  
7 9599% CI: 0.7975, 0.9398). In comparison to those participants aged 45-49 years, all  
8 other age groups have greater odds of ~~omega-3w3 FA supplement~~ use, with the  
9 highest being those aged 60-69 (OR=1.84; 9599% CI: 1.7773, 1.9496) and 70-79  
10 (OR=1.76; 9599% CI: 1.6964, 1.8590) years. In terms of gender, the odds of ~~omega-~~  
11 ~~3w3 FA supplement~~ use was 1.42 (9599% CI: 1.3936, 1.4652) times greater for female  
12 participants.  
13  
14  
15  
16  
17  
18  
19  
20  
21

Formatted: English (U.S.)

Formatted: English (U.S.)

## 22 DISCUSSION

23  
24 Our study, drawing upon the largest database with regards to ~~omega-3w3 FA~~  
25 ~~supplement~~ use to date and constituting the first analyses of the profile of users and  
26 prevalence of use of ~~omega-3w3 FA supplements~~ in Australia, shows 32.6% of the  
27 study participants, aged 45 years and older, consume ~~omega-3-w3 FA supplements~~.  
28 This finding identifies ~~omega-3w3 FA supplements~~ as one of the most commonly  
29 used dietary supplements ~~in Australia amongst older Australians~~ and is in line with  
30 previous research showing ~~omega-3w3 FA supplements~~ as among the top five  
31 complementary and alternative medicines recommended by Australian general  
32 practitioners and community pharmacists.<sup>[4]</sup> The discovery of such a high level of  
33 ~~omega-3w3 FA supplement~~ use ~~amongst older Australians~~ suggests that further  
34 research is needed to explore consumer behaviors and decision-making regarding  
35 ~~omega-3w3 FA supplement~~ use alongside assessing the possible health impacts of  
36 such consumption.  
37  
38  
39  
40  
41  
42  
43  
44  
45  
46  
47  
48  
49  
50  
51  
52

Formatted: English (U.S.)

Formatted: English (U.S.)

Formatted: Not Superscript/ Subscript

53 Overall, the findings of association between being female, of increased age, having  
54 advanced education *and* higher use of ~~omega-3w3 FA supplements~~ are congruent  
55  
56  
57  
58  
59  
60

Formatted: English (U.S.)

with factors predicting broader complementary and alternative medicine use.<sup>[3</sup>

Formatted: Not Superscript/ Subscript

<sup>22]</sup> The association of ~~omega-3w3 FA supplement~~ use with higher annual income

Formatted: English (U.S.)

and private health insurance highlights the potential importance of cost of ~~omega-~~

~~3w3 FA supplement~~ products with regards to consumption and this issue warrants

Formatted: English (U.S.)

further investigation. It is also important to note that ~~omega-3w3 FA supplements,~~

like many complementary and alternative medicine products more generally, is not

currently subsidised by the Australian Pharmaceutical Benefits Scheme (a Federal

government program providing subsidised prescription drugs to residents) and ~~as~~

~~such~~ attracts ~~an added~~ further 10% goods and services tax-~~that prescription~~

~~medicines do not. As such, cost issues associated with w3 FA supplementation may~~

~~be more focused in our Australian population.~~ Our finding of a positive association of

~~omega-3w3 FA supplement~~ use with higher annual income may also relate to the

Formatted: English (U.S.)

suggestion that socioeconomic status acts as a protective factor in health, with those

having better life chances more likely to adopt self-care measures to maintain their

health and quality of life.<sup>23]</sup>

The low use of ~~omega-3w3 FA supplements~~ among participants resident in rural and

Formatted: English (U.S.)

remote areas compared to those respondents living in metropolitan locations

contradicts the findings of previous research which show higher CAM use in rural

areas in Australia.<sup>22</sup> ~~The low use of omega-3 in these areas may reflect the lack of~~

~~access to supplements in geographically isolated regions.~~<sup>[24]</sup> However, it does

~~reflect findings from some national and international studies which suggest lower~~

~~rates of commercial or pre-packaged CAM product use amongst some rural~~

~~populations, when compared to their urban counterparts, which may be associated~~

~~with reduced access to these supplements.~~ <sup>[24]</sup> Indeed, the urban-rural divide in the

1  
2  
3  
4  
5  
6  
7 use of complementary and alternative medicine is an issue that has received much  
8 attention in recent ~~years<sup>22</sup> years~~[24-26] and the ~~finding of results from~~ our study ~~help~~  
9  
10 add to the evidence-base and discussion of this important health service issue and  
11  
12 highlight the need for further investigation into the complexities of ~~rural~~regional  
13 ~~variation in~~ supplement use.  
14  
15

Formatted: Not Superscript/ Subscript

16  
17  
18 The variations in the association of ~~omega-3w3 FA supplement~~ use with a range of  
19 clinical conditions are noteworthy, especially given the current varied clinical  
20 evidence-base of ~~omega-3-w3 FA supplements~~. The finding of low ~~omega-3w3 FA~~  
21 ~~supplement~~ use amongst people with cancer is not unexpected as research evidence  
22 suggests no association between ~~omega-3 and reducing cancer incidence~~.<sup>7</sup>~~w3 FA~~  
23 ~~supplements and reducing cancer incidence~~.<sup>10</sup> Additionally, external factors may  
24 ~~also result in lower omega-3 supplement use amongst people with cancer: patients~~  
25 ~~may relinquish their CAM use when their use of other forms of medical treatment~~  
26 ~~increases~~:<sup>27</sup> or patients may be advised to cease all other medications when  
27 ~~undergoing cancer treatment~~.<sup>28</sup> However, it is somewhat surprising that high  
28  
29 blood pressure is negatively associated with the use of ~~omega-3w3 FA supplement~~ as  
30 there is evidence that omega-3 has beneficial effects in the context of cardiovascular  
31 disease and in lowering blood pressure.<sup>5</sup>~~29~~ This is an area worthy of further  
32 empirical investigation.  
33  
34  
35  
36  
37  
38  
39  
40  
41  
42  
43  
44

45  
46 The association of higher ~~omega-3w3 FA supplement~~ use with diseases such as  
47 osteoarthritis, osteoporosis, anxiety and/or depression is interesting given there is  
48 currently either ~~no evidence~~conflicting or insufficient evidence on the efficacy of ~~fish~~  
49 ~~oil supplementation~~~~W3 FA supplements~~ in addressing these conditions – this  
50  
51  
52  
53  
54

1  
2  
3  
4  
5  
6  
7 suggests there may currently exist a mismatch between clinical evidence and  
8  
9 consumers' perceptions of evidence and benefits regarding omega-3w3 FA  
10 supplement use. Together, these study findings highlight the potential need for  
11  
12 nutrition guidelines for omega-3w3 FA supplement intake and consumer awareness  
13  
14 of the use of omega-3w3 FA supplements as well as possible enhanced information  
15  
16 and labeling of relevant products in Australia. The study findings also add weight to  
17  
18 recently identified evidence illustrating a desire for good quality information about  
19  
20 omega-3w3 FA supplement products amongst GPs and pharmacists.<sup>[4]</sup>

Formatted: Not Superscript/ Subscript

21  
22  
23  
24 The finding that respondents with better quality of life/health ratings or a healthy  
25  
26 lifestyle (e.g. non-smoking and/or having less alcoholic drinks) have greater odds of  
27  
28 omega-3w3 FA supplement use may indicate that omega-3 isw3 FA supplements are  
29  
30 used for both the treatment of specific health conditions and as a preventive therapy.  
31  
32 Previous research suggests that this distinction between therapeutic and preventive  
33  
34 use also exists for complementary and alternative medicine consumption more  
35  
36 broadly.<sup>25</sup> <sup>[30]</sup> Given these results, it would be useful for future studies to  
37  
38 differentiate between these two approaches (therapeutic and preventive use) to use  
39  
40 and to provide critical, in-depth examination of patients' motivations and  
41  
42 understandings regarding consumption of omega-3w3 FA supplements and other  
43  
44 CAM or dietary supplements.

45  
46  
47 The interpretation of our findings is limited by the fact that the association between  
48  
49 w3 FA supplement consumption with particular health conditions does not  
50  
51 necessarily imply that w3 FA supplements have been used specifically for these  
52  
53 conditions. In addition, the disease variable used from the 45 and Up Study survey

1  
2  
3  
4  
5  
6  
7 was based on individuals reporting that they had been ‘treated in last month’ rather  
8 than ‘ever been diagnosed’ and that health ~~and omega-3, w3 FA supplement use~~ and  
9 health care use is self-reported by the participants. As such our study results may be  
10 subject to recall bias. ~~and we may have missed some participants who had a disease~~  
11 ~~but were not treated for it in the month prior to being surveyed. Currently this study~~  
12 ~~focuses solely on the use of W3 FA supplements, and this research may have~~  
13 ~~benefitted by including an analysis of usual dietary intake (e.g. food frequency~~  
14 ~~questionnaire), in particular the consumption of omega 3 rich foods such as oily fish~~  
15 ~~that may be also be consumed for therapeutic benefit. Given the sample of 45 and Up~~  
16 ~~Study was drawn from the State of New South Wales, generalisation of the findings~~  
17 ~~of this research to other parts of Australia should be treated with caution. Finally, as~~  
18 ~~the statistical tests used in our analyses are influenced by sample size, the very large~~  
19 ~~sample size in this study can make small difference appear to be significant. As such,~~  
20 ~~readers need to take into account the absolute differences when interpreting the odds~~  
21 ~~ratios.~~ Nevertheless, these limitations are countered by the insights gained from  
22 analysing data from the largest sample of adults aged 45 years and older with regards  
23 to their consumption of ~~omega-3:w3 FA supplements.~~

## 42 CONCLUSION

43 ~~Omega-3 is~~W3 FA supplements are consumed for a wide variety of purposes by a  
44 considerable proportion of Australians aged 45 years and over. In the context of  
45 these study findings there is a need for primary health care practitioners to enquire  
46 with their patients about their use of ~~omega-3w3 FA supplements~~ as well as for  
47  
48  
49  
50  
51  
52

1  
2  
3  
4  
5  
6  
7  
8  
9  
10  
11  
12  
13  
14  
15  
16  
17  
18  
19  
20  
21  
22  
23  
24  
25  
26  
27  
28  
29  
30  
31  
32  
33  
34  
35  
36  
37  
38  
39  
40  
41  
42  
43  
44  
45  
46  
47  
48  
49  
50  
51  
52  
53  
54  
55  
56  
57  
58  
59  
60

further work to ensure provision of good quality information for patients and  
providers with regards to ~~omega-3w3 FA~~ products.

Formatted: English (Australia)

For peer review only



**Table 1 Demographic characteristic of people aged 45 years and older by Omega-3w3 FA supplement use**

| Demographic Characteristics    | Use of <u>Omega-3w3 FA supplements</u> |             | p-value  |         |
|--------------------------------|----------------------------------------|-------------|----------|---------|
|                                | Yes                                    | No          |          |         |
|                                | (n=86,939)                             | (n=179,907) |          |         |
|                                | % (SE)                                 | % (SE)      |          |         |
| <b>Sex</b>                     | Female                                 | 60 (0.2)    | 51 (0.1) | <0.0001 |
|                                | Male                                   | 40 (0.2)    | 49 (0.1) |         |
| <b>Age (years)</b>             | 45-49                                  | 10 (0.1)    | 14 (0.1) | <0.0001 |
|                                | 50-59                                  | 32 (0.2)    | 34 (0.1) |         |
|                                | 60-69                                  | 32 (0.2)    | 26 (0.1) |         |
|                                | 70-79                                  | 17 (0.1)    | 15 (0.1) |         |
|                                | 80+                                    | 9 (0.1)     | 11 (0.1) |         |
| <b>Place of Residence</b>      | Major city                             | 45 (0.2)    | 45 (0.1) | <0.0001 |
|                                | Inner regional                         | 36 (0.2)    | 35 (0.1) |         |
|                                | Outer regional                         | 17 (0.1)    | 18 (0.1) |         |
|                                | Remote/very remote                     | 2 (0.1)     | 2 (0.1)  |         |
| <b>Education</b>               | School Certificate or less             | 34 (0.2)    | 34 (0.1) | 0.0001  |
|                                | Higher School Certificate              | 10 (0.1)    | 10 (0.1) |         |
|                                | Trade/certificate/diploma              | 33 (0.2)    | 32 (0.1) |         |
|                                | Tertiary                               | 23 (0.1)    | 24 (0.1) |         |
| <b>Annual Household Income</b> | < \$20000                              | 25 (0.1)    | 25 (0.1) | <0.0001 |
|                                | \$20000-\$49999                        | 33 (0.2)    | 31 (0.1) |         |
|                                | \$50000-\$69999                        | 14 (0.1)    | 13 (0.1) |         |

Formatted: Line spacing: single

1  
2  
3  
4  
5  
6  
7  
8  
9  
10  
11  
12  
13  
14  
15  
16  
17  
18  
19  
20  
21  
22  
23  
24  
25  
26  
27  
28  
29  
30  
31  
32  
33  
34  
35  
36  
37  
38  
39  
40  
41  
42  
43  
44  
45  
46  
47  
48  
49  
50  
51  
52  
53  
54  
55  
56  
57  
58  
59  
60

|                         |                      |                 |                 |         |
|-------------------------|----------------------|-----------------|-----------------|---------|
|                         | ≥ \$70000            | 28 <u>(0.2)</u> | 31 <u>(0.1)</u> |         |
| <b>Marital Status</b>   | Married/defacto      | 75 <u>(0.1)</u> | 75 <u>(0.1)</u> | <0.0001 |
|                         | Widow/divorce/separ. | 20 <u>(0.1)</u> | 19 <u>(0.1)</u> |         |
|                         | Single               | 5 <u>(0.1)</u>  | 6 <u>(0.1)</u>  |         |
| <b>Health Insurance</b> | Private              | 55 <u>(0.2)</u> | 53 <u>(0.1)</u> | <0.0001 |
|                         | DVA or HCC           | 30 <u>(0.2)</u> | 29 <u>(0.1)</u> |         |
|                         | None                 | 15 <u>(0.1)</u> | 18 <u>(0.1)</u> |         |

\* SE = Standard Error

Table 2 Health status characteristics of people aged 45 years and older by **Omega-3w3 FA supplement** use

| Health Status Characteristics  |                          | Use of <b>Omega-3w3 FA supplements</b> |                   | p-value |
|--------------------------------|--------------------------|----------------------------------------|-------------------|---------|
|                                |                          | Yes<br>(n=86,939)                      | No<br>(n=179,907) |         |
|                                |                          | % (SE)                                 | % (SE)            |         |
| <b>Smoking Status</b>          | Current smoker           | 5 (0.1)                                | 8 (0.1)           | <0.0001 |
|                                | Former smoker            | 36 (0.2)                               | 35 (0.1)          |         |
|                                | Never smoked             | 59 (0.2)                               | 56 (0.1)          |         |
| <b>Alcohol Consumption</b>     | 0-6 drinks per week      | 64 (0.2)                               | 62 (0.1)          | <0.0001 |
|                                | 7-13 drinks per week     | 19 (0.1)                               | 19 (0.1)          |         |
|                                | 14-20 drinks per week    | 11 (0.1)                               | 11 (0.1)          |         |
|                                | ≥ 21 drinks per week     | 6 (0.1)                                | 8 (0.1)           |         |
| <b>Overall Health</b>          | Excellent/very good/good | 87 (0.1)                               | 85 (0.1)          | <0.0001 |
|                                | Fair/poor                | 13 (0.1)                               | 15 (0.1)          |         |
| <b>Overall Quality Of Life</b> | Excellent/very good/good | 90 (0.1)                               | 89 (0.1)          | <0.0001 |
|                                | Fair/poor                | 10 (0.1)                               | 11 (0.1)          |         |
| <b>Osteoarthritis</b>          | Yes                      | 11 (0.1)                               | 7 (0.1)           | <0.0001 |
|                                | No                       | 89 (0.1)                               | 93 (0.1)          |         |
| <b>Osteoporosis</b>            | Yes                      | 7 (0.1)                                | 5 (0.1)           | <0.0001 |
|                                | No                       | 93 (0.1)                               | 95 (0.1)          |         |

Formatted: Line spacing: single

|    |                         |                 |                 |                 |         |
|----|-------------------------|-----------------|-----------------|-----------------|---------|
| 1  |                         |                 |                 |                 |         |
| 2  |                         |                 |                 |                 |         |
| 3  |                         |                 |                 |                 |         |
| 4  |                         |                 |                 |                 |         |
| 5  |                         |                 |                 |                 |         |
| 6  |                         |                 |                 |                 |         |
| 7  |                         |                 |                 |                 |         |
| 8  | <b>Asthma</b>           | Yes             | 5 <u>(0.1)</u>  | 4 <u>(0.1)</u>  | <0.0001 |
| 9  |                         | No              | 95 <u>(0.1)</u> | 96 <u>(0.1)</u> |         |
| 10 |                         |                 |                 |                 |         |
| 11 |                         |                 |                 |                 |         |
| 12 |                         |                 |                 |                 |         |
| 13 | <b>Cancer</b>           | Yes             | 2 <u>(0.1)</u>  | 3 <u>(0.1)</u>  | <0.0001 |
| 14 |                         | No              | 98 <u>(0.1)</u> | 97 <u>(0.1)</u> |         |
| 15 |                         |                 |                 |                 |         |
| 16 |                         |                 |                 |                 |         |
| 17 |                         |                 |                 |                 |         |
| 18 | <b>High Blood</b>       | Yes             | 26 <u>(0.1)</u> | 24 <u>(0.1)</u> | <0.0001 |
| 19 | <b>Pressure</b>         | No              | 74 <u>(0.1)</u> | 76 <u>(0.1)</u> |         |
| 20 |                         |                 |                 |                 |         |
| 21 |                         |                 |                 |                 |         |
| 22 |                         |                 |                 |                 |         |
| 23 | <b>High Cholesterol</b> | Yes             | 17 <u>(0.1)</u> | 14 <u>(0.1)</u> | <0.0001 |
| 24 |                         | No              | 83 <u>(0.1)</u> | 86 <u>(0.1)</u> |         |
| 25 |                         |                 |                 |                 |         |
| 26 |                         |                 |                 |                 |         |
| 27 | <b>Heart Attack or</b>  | Yes             | 3 <u>(0.1)</u>  | 3 <u>(0.1)</u>  | 0.2996  |
| 28 | <b>Angina</b>           | No              | 97 <u>(0.1)</u> | 97 <u>(0.1)</u> |         |
| 29 |                         |                 |                 |                 |         |
| 30 |                         |                 |                 |                 |         |
| 31 |                         |                 |                 |                 |         |
| 32 | <b>Other Heart</b>      | Yes             | 3 <u>(0.1)</u>  | 3 <u>(0.1)</u>  | 0.6606  |
| 33 | <b>Disease</b>          | No              | 97 <u>(0.1)</u> | 97 <u>(0.1)</u> |         |
| 34 |                         |                 |                 |                 |         |
| 35 |                         |                 |                 |                 |         |
| 36 |                         |                 |                 |                 |         |
| 37 | <b>Thyroid</b>          | Yes             | 6 <u>(0.1)</u>  | 5 <u>(0.1)</u>  | <0.0001 |
| 38 | <b>Problems</b>         | No              | 94 <u>(0.1)</u> | 95 <u>(0.1)</u> |         |
| 39 |                         |                 |                 |                 |         |
| 40 |                         |                 |                 |                 |         |
| 41 |                         |                 |                 |                 |         |
| 42 | <b>Anxiety &amp;</b>    | Neither         | 91 <u>(0.1)</u> | 92 <u>(0.1)</u> | <0.0001 |
| 43 | <b>Depression</b>       | Depression only | 4 <u>(0.1)</u>  | 4 <u>(0.1)</u>  |         |
| 44 |                         | Anxiety only    | 2 <u>(0.1)</u>  | 1 <u>(0.1)</u>  |         |
| 45 |                         | Both            | 3 <u>(0.1)</u>  | 3 <u>(0.1)</u>  |         |
| 46 |                         |                 |                 |                 |         |
| 47 |                         |                 |                 |                 |         |
| 48 |                         |                 |                 |                 |         |
| 49 |                         |                 |                 |                 |         |
| 50 |                         |                 |                 |                 |         |
| 51 |                         |                 |                 |                 |         |
| 52 |                         |                 |                 |                 |         |
| 53 |                         |                 |                 |                 |         |
| 54 |                         |                 |                 |                 |         |
| 55 |                         |                 |                 |                 |         |
| 56 |                         |                 |                 |                 |         |
| 57 |                         |                 |                 |                 |         |
| 58 |                         |                 |                 |                 |         |
| 59 |                         |                 |                 |                 |         |
| 60 |                         |                 |                 |                 |         |

\* SE = Standard Error

Table 3 Multiple logistic regression model for predicting use of Omega-3w3 FA supplements in people aged 45 years and older

| Factor                         |                    | Odds Ratio | <del>95</del> 99% C.I.        |
|--------------------------------|--------------------|------------|-------------------------------|
| <b>Sex</b>                     | Male               | 1.00       | —                             |
|                                | Female             | 1.42       | <u>1.3937</u> , <u>1.4648</u> |
| <b>Age</b>                     | 45-49              | 1.00       | —                             |
|                                | 50-59              | 1.43       | <u>1.3936</u> , <u>1.4952</u> |
|                                | 60-69              | 1.84       | <u>1.7773</u> , <u>1.9196</u> |
|                                | 70-79              | 1.76       | <u>1.6964</u> , <u>1.8590</u> |
|                                | 80+                | 1.32       | <u>1.2521</u> , <u>1.3944</u> |
| <b>Place of Residence</b>      | Major city         | 1.00       | —                             |
|                                | Inner regional     | 0.98       | <u>0.9695</u> , <u>1.0402</u> |
|                                | Outer regional     | 0.89       | <u>0.8685</u> , <u>0.9293</u> |
|                                | Remote/very remote | 0.86       | <u>0.7975</u> , <u>0.9398</u> |
| <b>Annual Household Income</b> | < \$20000          | 1.00       | —                             |
|                                | \$20000-\$49999    | 1.14       | <u>1.4408</u> , <u>1.4820</u> |
|                                | \$50000-\$69999    | 1.13       | <u>1.0906</u> , <u>1.1821</u> |
|                                | ≥ \$70000          | 1.03       | <u>0.9997</u> , <u>1.0710</u> |
| <b>Insurance</b>               | Private            | 1.00       | —                             |
|                                | DVA or HCC         | 0.93       | <u>0.9089</u> , <u>0.9598</u> |
|                                | None               | 0.84       | <u>0.8280</u> , <u>0.8689</u> |
| <b>Smoking</b>                 | Current smoker     | 1.00       | —                             |

1  
2  
3  
4  
5  
6  
7  
8  
9  
10  
11  
12  
13  
14  
15  
16  
17  
18  
19  
20  
21  
22  
23  
24  
25  
26  
27  
28  
29  
30  
31  
32  
33  
34  
35  
36  
37  
38  
39  
40  
41  
42  
43  
44  
45  
46  
47  
48  
49  
50  
51  
52  
53  
54  
55  
56  
57  
58  
59  
60

|                                 |                          |      |                                           |
|---------------------------------|--------------------------|------|-------------------------------------------|
| <b>Status</b>                   | Former smoker            | 1.66 | <u>1.5853</u> , <u>1.7479</u>             |
|                                 | Never smoked             | 1.56 | <u>1.4944</u> , <u>1.6369</u>             |
| <b>Alcohol Consumption</b>      | 0-6 drinks per week      | 1.00 | —                                         |
|                                 | 7-13 drinks per week     | 1.02 | <u>0.9997</u> , <u>1.0507</u>             |
|                                 | 14-20 drinks per week    | 0.94 | <u>0.91</u> , <u>0.9889</u> , <u>1.00</u> |
|                                 | ≥ 21 drinks per week     | 0.83 | <u>0.8078</u> , <u>0.8789</u>             |
| <b>Overall Health</b>           | Excellent/very good/good | 1.00 | —                                         |
|                                 | Fair/poor                | 0.82 | <u>0.7977</u> , <u>0.8486</u>             |
| <b>Osteoarthritis</b>           | No                       | 1.00 | —                                         |
|                                 | Yes                      | 1.65 | <u>1.5955</u> , <u>1.7276</u>             |
| <b>Osteoporosis</b>             | No                       | 1.00 | —                                         |
|                                 | Yes                      | 1.09 | <u>1.0401</u> , <u>1.4518</u>             |
| <b>Cancer</b>                   | No                       | 1.00 | —                                         |
|                                 | Yes                      | 0.89 | <u>0.8480</u> , <u>0.9599</u>             |
| <b>High Blood Pressure</b>      | No                       | 1.00 | —                                         |
|                                 | Yes                      | 0.95 | <u>0.9391</u> , <u>0.9899</u>             |
| <b>High Cholesterol</b>         | No                       | 1.00 | —                                         |
|                                 | Yes                      | 1.23 | <u>1.4917</u> , <u>1.2729</u>             |
| <b>Anxiety &amp; Depression</b> | Neither                  | 1.00 | —                                         |
|                                 | Depression only          | 1.01 | <u>0.9692</u> , <u>1.0711</u>             |
|                                 | Anxiety only             | 1.16 | <u>1.0701</u> , <u>1.2634</u>             |
|                                 | Both                     | 1.19 | <u>1.4207</u> , <u>1.2732</u>             |

## Glossary

|                           |                                               |
|---------------------------|-----------------------------------------------|
| <u>CAM</u>                | <u>Complementary and alternative medicine</u> |
| <u>DHA</u>                | <u>Docosahexaenoic acid</u>                   |
| <u>EPA</u>                | <u>Eicosapentaenoic acid</u>                  |
| <u>GP</u>                 | <u>General Practitioner</u>                   |
| <u>Omega-3 Fatty Acid</u> | <u>w3 FA</u>                                  |

## ACKNOWLEDGEMENTS

We thank the men and women participating in the 45 and Up Study. The 45 and Up study is managed by the Sax Institute in collaboration with major partner Cancer Council New South Wales, and partners: the National Heart Foundation of Australia (NSW Division); NSW Health; *beyondblue: the national depression initiative*; Ageing, Disability and Home Care, Department of Human Services NSW; and UnitingCare Ageing.

## COMPETING INTERESTS

None.

## FUNDING

This research received no specific grant from any funding agency in the public, commercial or not-for-profit sectors.

## AUTHORS CONTRIBUTION

All authors devised the study and helped to conceptualize ideas, interpret findings, manuscript writing and reviewing drafts of the article. JA and DS acquired the data from the 45 and Up Study. DS undertook data analysis and JA, DS, CL, AB, JW



1  
2  
3  
4  
5  
6  
7 contributed to the interpretation of the data. All authors read and approved the final  
8  
9 manuscript.

## 10 11 12 13 14 **DATA SHARING STATEMENT**

15  
16  
17 There are no additional data available.  
18  
19  
20  
21  
22  
23  
24  
25  
26  
27  
28  
29  
30  
31  
32  
33  
34  
35  
36  
37  
38  
39  
40  
41  
42  
43  
44  
45  
46  
47  
48  
49  
50  
51  
52  
53  
54  
55  
56  
57  
58  
59  
60

## REFERENCES

1. Gahche J, Bailey R, Burt V, ~~Hughes J, Yetley E, Dwyer J~~, et al. Dietary Supplement Use Among U.S. Adults Has Increased Since NHANES III (1988–1994). NCHS Data Brief. Atlanta: Centers for Disease Control and Prevention, 2011:1-8. Formatted: Line spacing: 1.5 lines
2. Skeie G, Braaten T, Hjartåker A, ~~Lentjes M, Amiano P, Jakszyn P~~, et al. Use of dietary supplements in the European Prospective Investigation into Cancer and Nutrition calibration study. *Eur J Clin Nutr* 2009;**63**:226-38. Formatted: Font: Not Italic
3. Barnes PM, Bloom B, Nahin RL. Complementary and Alternative Medicine Use Among Adults and Children: United States, 2007 Hyattsville: U.S. Department of Health and Human Services, Division of Health Interview Statistics, Centers for Disease Control and Prevention, National Center for Health Statistics, 2008. Formatted: Font: Not Italic  
Formatted: Font: Bold
4. Brown J, Morgan T, Adams J, ~~Grunseit A, Toms M, Roufogalis B~~, et al. Complementary Medicines Information Use and Needs of Health Professionals: General Practitioners and Pharmacists. Sydney: National Prescribing Service, 2008.
5. ~~Wang C, Harris WS, Chung M, Lichtenstein AH, Balk EM, Kupelnick B, et al. Chowdhury R, Stevens S, Gorman D, et al. Association between fish consumption, long chain omega 3 fatty acids, and risk of cerebrovascular disease: Systematic review and meta-analysis. *BMJ* 2012;**345**(e6698)~~
6. Filion KB, El Khoury F, Bielinski M, et al. Omega-3 fatty acids in high-risk cardiovascular patients: a meta-analysis of randomized controlled trials. *BMC Cardiovasc Disord* 2010;**10**(24)
7. Kromhout D, Yasuda S, Geleijnse JM, et al. Fish oil and omega-3 fatty acids in cardiovascular disease: do they really work? *European Heart Journal* 2012;**33**:436–43
8. Rizos EC, Ntzani EE, Bika E, et al. Association between omega-3 fatty acid supplementation and risk of major cardiovascular disease events: a systematic review and meta-analysis. *JAMA* 2012;**308**(10):1024-33

- ~~9~~ ~~N-3 Fatty acids from fish or fish-oil supplements, but not alpha-linolenic acid, benefit cardiovascular disease outcomes in primary and secondary prevention studies: a systematic review. Am J Clin Nutr 2006;84(1):5-17.~~
6. National Heart Foundation of Australia. Position Statement: Fish, Fish Oils, n-3 Polyunsaturated Fatty Acids and Cardiovascular Health. Sydney: National Heart Foundation of Australia, 2008.
- ~~7~~10. MacLean CH, Newberry SJ, Mojica WA, ~~Khanna P, Issa AM, Suttorp MJ~~, et al. Effects of omega-3 fatty acids on cancer risk: a systematic review. JAMA: Journal of the American Medical Association 2006;~~295~~(4):403-15.
- ~~8~~11. Colomera R, Moreno-Nogueira JM, García-Luna PP, ~~García-Perisa P, García-de Lorenzo A, Zarazaga A~~, et al. N-3 fatty acids, cancer and cachexia: a systematic review of the literature. British Journal of Nutrition 2007;~~97~~(5):823-31.
- ~~9~~12. Lin P-Y, Su K-P. A meta-analytic review of double-blind, placebo-controlled trials of antidepressant efficacy of Omega-3 fatty acids. Journal of Clinical Psychiatry 2007;~~68~~(7):1056-61.
- ~~10~~13. Montgomery P, Richardson AJ. Omega-3 fatty acids for bipolar disorder. Cochrane Database of Systematic Reviews 2008(2):Art. No.: CD005169. DOI: 10.1002/14651858.CD005169.pub2.
- ~~11~~14. Thien FCK, De Luca S, Woods RK, ~~Abramson MJ et al~~. Dietary marine fatty acids (fish oil) for asthma in adults and children. Cochrane Database of Systematic Reviews 2002(2):Art. No.: CD001283. DOI: 10.1002/14651858.CD001283.
- ~~12~~15. Oliver C, Everard M, N'Diaye T. Omega-3 fatty acids (from fish oils) for cystic fibrosis. Cochrane Database of Systematic Reviews 2007(4).
- ~~13~~16. Agency for Healthcare Research and Quality. Effects of omega-3 fatty acids on lipids and glycemic control in type II diabetes and the metabolic syndrome and on inflammatory bowel disease, rheumatoid arthritis, renal disease, systemic lupus erythematosus, and osteoporosis. Rockville: Agency for Healthcare Research and Quality, 2004.
- ~~14~~14. Lim WS, ~~Gammaek JK, Van Niekerk JK~~17. Sydenham E, Dangour AAD, Lim W-S. Omega 3 fatty acid for the prevention of cognitive decline and dementia.

Formatted: Font: Not Italic

Formatted: Font: Bold

Formatted: Line spacing: 1.5 lines

Formatted: Font: Not Italic

Formatted: Font: Bold

Formatted: Font: Not Italic

Formatted: Font: Bold

Formatted: Font: Not Italic

Formatted: Font: Bold

Formatted: Font: Not Italic

Formatted: Font: Not Italic

Formatted: Font: Not Italic

- 1  
2  
3  
4  
5  
6  
7  
8  
9  
10  
11  
12  
13  
14  
15  
16  
17  
18  
19  
20  
21  
22  
23  
24  
25  
26  
27  
28  
29  
30  
31  
32  
33  
34  
35  
36  
37  
38  
39  
40  
41  
42  
43  
44  
45  
46  
47  
48  
49  
50  
51  
52  
53  
54  
55  
56  
57  
58  
59  
60
- Cochrane Database of Systematic Reviews ~~2006(1):Art. No.: CD005379.~~  
~~DOI:10.1002/14651858.CD005379.pub2-pub3[published Online~~  
~~First: Epub Date]].~~
15. World Health Organization. Reducing Risks, Promoting Healthy Life. Geneva:  
World Health Organization, 2005.
16. National Preventive Health Taskforce. National Preventive Health Strategy—the  
Roadmap for Action. Canberra: Commonwealth of Australia, 2009.
18. James S, Montgomery P, Williams K. Omega-3 fatty acids supplementation for  
autism spectrum disorders (ASD). Cochrane Database of Systematic Reviews  
2011(11) doi: 10.1002/14651858.CD007992.pub2[published Online First:  
Epub Date]].
19. Niehter M, Jo Thompson J. For my wellness, not just my illness: North  
Americans' use of dietary supplements. *Culture, Medicine and Psychiatry*  
2006;30(2):175-222.
18. Kickbusch I, Payne L. Twenty-first century health promotion: the public health  
revolution meets the wellness revolution. *Health Promotion International*  
2003;18(4):275-78.
19. 20. 45 and Up Study Collaborators. Cohort profile: the 45 and Up Study.  
*International Journal of Epidemiology* 2008;37:941-47.
20. 21. Mealing N, Banks E, Jorm L, et al. Investigation of relative risk estimates from  
studies of the same population with contrasting response rates and designs.  
*BMC Medical Research Methodology* 2010;10(26)
22. Adams J, Sibbritt D, Easthope G, Young A et al. The profile of women who consult  
alternative health practitioners in Australia. *Medical Journal of Australia*  
2003;179:297-300.
23. Cockerham WC. Health lifestyles: Bringing structure back. In: Cockerham WC,  
edited. *The New Blackwell Companion to Medical Sociology*. Oxford: Wiley-  
Blackwell, 2009:159-83.
24. Wardle J, Lui C-W, Adams J. Complementary and alternative medicine in  
rural communities: current research and future directions. *Journal of Rural  
Health* 2012;28(1):101-12.

Formatted: Font: Not Italic

Formatted: Line spacing: 1.5 lines

Formatted: Font: Not Italic

Formatted: Font: Bold

Formatted: Font: Not Italic

Formatted: Font: Bold

Formatted: Line spacing: 1.5 lines

Formatted: Font: Not Italic

Formatted: Font: Bold

Formatted: Font: Not Italic

Formatted: Font: Not Italic

Formatted: Font: Bold

- 1  
2  
3  
4  
5  
6  
7  
8  
9  
10  
11  
12  
13  
14  
15  
16  
17  
18  
19  
20  
21  
22  
23  
24  
25  
26  
27  
28  
29  
30  
31  
32  
33  
34  
35  
36  
37  
38  
39  
40  
41  
42  
43  
44  
45  
46  
47  
48  
49  
50  
51  
52  
53  
54  
55  
56  
57  
58  
59  
60
- ~~23~~25. Adams J, Sibbritt D, Lui C-W. The urban-rural divide in complementary and alternative medicine use: a longitudinal study of 10,638 women. *BMC Complementary and Alternative Medicine* 2011;~~11~~(2):1-11
- ~~24~~26. Adams J. Exploring the interface between complementary and alternative medicine (CAM) and rural general practice: A call for research. *Health and Place* 2004;~~10~~(3):285-87
27. Sibbritt DW, Adams J, Young AF. A longitudinal analysis of mid-age women's use of complementary and alternative medicine (CAM) in Australia, 1996-1998. *Women Health* 2004;~~40~~(4):41-56
28. Broom A, Adams J. Oncology clinicians' accounts of discussing complementary and alternative medicine with their patients. *Health* 2009;~~13~~(3):317-36
29. Wang C, Harris WS, Chung M, et al. N-3 Fatty acids from fish or fish-oil supplements, but not alpha-linolenic acid, benefit cardiovascular disease outcomes in primary- and secondary-prevention studies: a systematic review. *Am J Clin Nutr* 2006;~~84~~(1):5-17
30. Bishop FL, Yardley L, Lewith GT. Treat or treatment - a qualitative study analyzing patients' use of CAM. *American Journal of Public Health* 2008;~~98~~(9):1700-05

Formatted: Font: Not Italic

Formatted: Font: Bold

Formatted: Font: Not Italic

Formatted: Font: Bold

Formatted: Font: Not Italic

Formatted: Font: Bold

Formatted: Line spacing: 1.5 lines

Formatted: Font: Not Italic

Formatted: Font: Bold



## Omega-3 Fatty Acid Supplement Use in the 45 and Up Study Cohort

|                                 |                                                                                                                                                                                                                                                                                                                                                         |
|---------------------------------|---------------------------------------------------------------------------------------------------------------------------------------------------------------------------------------------------------------------------------------------------------------------------------------------------------------------------------------------------------|
| Journal:                        | <i>BMJ Open</i>                                                                                                                                                                                                                                                                                                                                         |
| Manuscript ID:                  | bmjopen-2012-002292.R2                                                                                                                                                                                                                                                                                                                                  |
| Article Type:                   | Research                                                                                                                                                                                                                                                                                                                                                |
| Date Submitted by the Author:   | 27-Feb-2013                                                                                                                                                                                                                                                                                                                                             |
| Complete List of Authors:       | Adams, Jon; University of Technology Sydney, Faculty of Health<br>Sibbritt, David; University of Technology Sydney, Faculty of Health<br>Lui, Chi-Wai; University of Queensland, School of Population Health<br>Broom, Alex; University of Queensland, School of Social Science<br>Wardle, Jonathan; University of Technology Sydney, Faculty of Health |
| <b>Primary Subject Heading</b>: | Complementary medicine                                                                                                                                                                                                                                                                                                                                  |
| Secondary Subject Heading:      | Public health, Nutrition and metabolism                                                                                                                                                                                                                                                                                                                 |
| Keywords:                       | COMPLEMENTARY MEDICINE, NUTRITION & DIETETICS, PUBLIC HEALTH                                                                                                                                                                                                                                                                                            |
|                                 |                                                                                                                                                                                                                                                                                                                                                         |

SCHOLARONE™  
Manuscripts

Peer Review Only

# TITLE PAGE

## **Omega-3 Fatty Acid Supplement Use in the 45 and Up Study Cohort**

Jon Adams

Professor, Faculty of Health, University of Technology Sydney, Sydney, Australia

David Sibbritt

Professor, Faculty of Health, University of Technology Sydney, Sydney, Australia

Chi-Wai Lui

Lecturer, School of Population Health, University of Queensland, Brisbane, Australia

Alex Broom

Associate Professor, School of Social Science, University of Queensland, Brisbane,  
Australia

Jonathan Wardle

Research Fellow, Faculty of Health, University of Technology Sydney, Sydney,  
Australia

1  
2  
3 *Correspondence:*  
4

5 Jon Adams  
6

7 Faculty of Health  
8

9 University of Technology Sydney  
10

11 Level 7 Building 10, 235-253 Jones Street  
12

13 Ultimo New South Wales 2007, Australia  
14

15 Email: [jon.adams@uts.edu.au](mailto:jon.adams@uts.edu.au)  
16

17 Phone: +61 2 9514 4821  
18

19 Fax: +61 2 9514 4835  
20  
21  
22  
23  
24  
25  
26  
27

28 **Keywords**  
29

30 Omega-3, fish oils, dietary supplements, utilization, adult  
31  
32  
33  
34  
35

36 **Word Count**  
37

38 2,933 words  
39  
40  
41  
42  
43  
44  
45  
46  
47  
48  
49  
50  
51  
52  
53  
54  
55  
56  
57  
58  
59  
60



## ABSTRACT

*Objective:* There has been a dramatic increase in the use of dietary supplements in Western societies over the past decades. Our understanding of the prevalence of omega-3 fatty acid supplement consumption is of significance for future nutrition planning, health promotion and care delivery. However, we know little about omega-3 fatty acid supplement consumption or users. This paper, drawing upon the largest dataset with regards to omega-3 fatty acid supplement use (n=266,848), examines the use and users of this supplement amongst a large sample of older Australians living in New South Wales.

*Design:* Cross-sectional study. Data were analysed from the 45 and Up Study, the largest study of healthy ageing ever undertaken in the Southern Hemisphere.

*Setting:* New South Wales, Australia.

*Participants:* 266,848 participants of the 45 and Up Study.

*Primary and Secondary Outcome Measures:* Participants' use of omega-3, demographics (geographical location, marital status, education level, income and level of healthcare insurance) and health status (quality of life, history of smoking and alcohol consumption, health conditions) were measured.

1  
2  
3 *Results:* Of the 266,848 participants, 32.6% reported having taken omega-3 in the 4  
4 weeks prior to the survey. Use of omega-3 fatty acid supplements was higher among  
5 female, non-smokers, non- to mild (alcoholic) drinkers, residing in a major city,  
6  
7 having higher income and private health insurance. Osteoarthritis, osteoporosis,  
8  
9 high cholesterol, and anxiety and/or depression were positively associated with  
10  
11 omega-3 fatty acid supplement use, while cancer and high blood pressure were  
12  
13 negatively associated with use of omega 3 fatty acid supplements.  
14  
15  
16  
17  
18  
19

20  
21 *Conclusions:* This study, analysing data from the 45 and Up Study cohort, suggests  
22  
23 that a considerable proportion of older Australians consume omega-3 fatty acid  
24  
25 supplements. There is a need for primary healthcare practitioners to enquire with  
26  
27 patients about this supplement use and for work to ensure provision of good quality  
28  
29 information for patients and providers with regards to omega-3 fatty acid products.  
30  
31  
32  
33  
34  
35  
36  
37  
38  
39  
40  
41  
42  
43  
44  
45  
46  
47  
48  
49  
50  
51  
52  
53  
54  
55  
56  
57  
58  
59  
60

# ARTICLE SUMMARY

## Article Focus

- The use of dietary supplements has increased rapidly in Western societies over past decades.
- Our study examines the use of omega-3 fatty acid supplements amongst older Australians, drawing upon the largest study of healthy ageing undertaken in the Southern Hemisphere (n=266,848).

## Key Messages

- A considerable proportion of older Australians living in New South Wales (32.6%) report using omega-3 fatty acid supplements.
- People with osteoarthritis, osteoporosis, high cholesterol, and anxiety and/or depression were more likely to use omega-3 fatty acid supplements, while people with cancer and high blood pressure were less likely to use omega 3 fatty acid supplements.
- There is a need to ensure provision of good quality information for patients and providers with regards to omega-3 fatty acid supplement products.

## Strengths and Limitations of this Study

- Our study benefits from the use of the largest sample of Australians aged 45 years and older with regards to the consumption of omega-3 fatty acid supplement.

- 1
  - 2
  - 3
  - 4
  - 5
  - 6
  - 7
  - 8
  - 9
  - 10
  - 11
  - 12
  - 13
  - 14
  - 15
  - 16
  - 17
  - 18
  - 19
  - 20
  - 21
  - 22
  - 23
  - 24
  - 25
  - 26
  - 27
  - 28
  - 29
  - 30
  - 31
  - 32
  - 33
  - 34
  - 35
  - 36
  - 37
  - 38
  - 39
  - 40
  - 41
  - 42
  - 43
  - 44
  - 45
  - 46
  - 47
  - 48
  - 49
  - 50
  - 51
  - 52
  - 53
  - 54
  - 55
  - 56
  - 57
  - 58
  - 59
  - 60
- The interpretation of our findings is limited by the fact that the use of omega-3 fatty acid supplement was self-reported by the participants and their answers may have been subject to recall bias.

For peer review only

# MAIN TEXT

## Omega-3 Fatty Acid Supplement Use in the 45 and Up Study Cohort

### INTRODUCTION

There has been a dramatic increase in the use of dietary supplements in Western industrialized societies over the past few decades. The proportion of American adults using at least one dietary supplement has increased from 42% to 53% between 1994 and 2006.[1] Research also shows the use of dietary supplements is common in European countries such as Denmark (66% of men and 51% of women) and the United Kingdom (48% of women and 36% of men).[2]

In 2007, a national US survey identified omega-3 fatty acid (w3 FA) supplements (products containing docosahexaenoic acid (DHA) and eicosapentaenoic acid (EPA) products) as the first (for adults) and second (for children) most commonly used natural (non-vitamin, non-mineral) product in America.[3] In Australia, a substantial proportion of GPs (80.3%) and community pharmacists (90.2%) recommend omega-3 to patients[4] and findings from this Australian research also identify w3 FA supplement as among the top five complementary and alternative medicines about which healthcare professionals (71.6% of GP and 71.7% of pharmacists) desire better quality information.

1  
2  
3 The clinical evidence base for w3 FA supplement use is varied depending on the  
4 specific condition. There is evidence that w3 FA supplements help in preventing or  
5 benefiting the outcomes of cardiovascular disease with some evidence suggesting a  
6 cholesterol lowering effect.[5-7] However, a meta-analysis study released in 2012  
7 found no relation between use of w3 FA supplements and reduced risk of major  
8 cardiovascular diseases.[8] At present, the National Heart Foundation of Australia  
9 recommends all Australian adults consume about 500 mg (or 1,000 mg for those  
10 who have documented coronary heart disease) of w3 FA per day.[9]

11  
12  
13 Beyond cardiovascular disease, existing research has found no evidence of a  
14 significant association between w3 FA supplement use and reducing cancer  
15 incidence.[10] However, there is some evidence that w3 FA supplements may  
16 improve clinical, biological and quality of life parameters amongst patients with  
17 advanced cancer.[11] There is currently conflicting or insufficient scientific evidence  
18 on the efficacy of w3 FA supplements regarding improvement of mental health  
19 disorders,[12 13] asthma,[14] cystic fibrosis,[15] rheumatoid arthritis, inflammatory  
20 bowel disease and osteoporosis[16] and cognitive functions affected by aging,  
21 dementia, and neurological diseases.[17 18]

22  
23  
24 Given the rise of population ageing and increasing public awareness of the  
25 importance of preventive health,[19] knowledge about consumption of dietary  
26 supplements such as w3 FA is of significance for future health promotion and health  
27 care delivery. In response, this paper describes the findings of the first study to  
28 examine the use of w3 FA supplements in Australia. It aims to provide analysis of the

1  
2  
3 prevalence and characteristics of omega-3 use amongst a large sample of Australians  
4  
5 (n=266,848) aged 45 years and older.  
6  
7  
8  
9

## 10 11 **METHOD**

### 12 13 ***Sample***

14  
15 This research utilised data collected through the 45 and Up Study, which is the  
16  
17 largest study of healthy ageing conducted in the Southern Hemisphere and analyses  
18  
19 data from 266,848 men and women aged 45 and older who reside in the State of New  
20  
21 South Wales, Australia. The 45 and Up study is described in detail elsewhere,[20] but  
22  
23 briefly, individuals aged 45 years and over and resident in New South Wales were  
24  
25 randomly selected from the Medicare Australia database, which provides virtually  
26  
27 complete coverage of the general population. Eligible individuals were mailed an  
28  
29 invitation to take part, an information leaflet, the study questionnaire and consent  
30  
31 form and a reply paid envelope (available at [www.45andUp.org.au](http://www.45andUp.org.au)). Participants  
32  
33 joined the 45 and Up Study by completing the questionnaire and consent form and  
34  
35 mailing them to the Study coordinating centre. The study over-sampled, by a factor  
36  
37 of two, individuals aged 80 years and over and people resided in rural areas; all  
38  
39 residents of remote areas were sampled. The 45 and Up Study sample included  
40  
41 approximately 10% of the general population in the target age range. Recruitment  
42  
43 began in February 2006 and the analyses reported in this paper relate to the 266,848  
44  
45 participants joining the study at the close of December, 2009. The overall response  
46  
47 rate to the mailed invitations to join the study is estimated to be 17.9%, however, the  
48  
49 exact response rate is difficult to specify as some people may not have received the  
50  
51 invitation if their address details were incorrect in the Medicare Australia  
52  
53  
54  
55  
56  
57  
58  
59  
60

1  
2  
3 database.[20] The 45 and Up study sample has excellent heterogeneity and - in  
4  
5 comparison to the (State of ) New South Wales Population Health Survey - is  
6  
7 reasonably representative of the New South Wales population in terms of gender, age  
8  
9 and education; although there were differences in terms of primary language, health  
10  
11 insurance, smoking status, psychological distress, and diagnosis of some health  
12  
13 conditions.[21] Further, the study has a response rate comparable to similar studies  
14  
15 internationally and in Australia, and is among the most representative large scale  
16  
17 cohort studies in the world.[21] The 45 and Up Study received ethics approval from  
18  
19 the University of New South Wales Human Research Ethics Committee.  
20  
21

### 22 23 24 25 ***Use of Omega-3***

26  
27  
28 Participants were defined as being an w3 FA supplement user if they answered 'yes'  
29  
30 to the following question: 'In the past 4 weeks have you taken fish oil or Omega-3.'  
31  
32

### 33 34 35 ***Demographic measures***

36  
37 Area of residence was assigned according to the Accessibility Remoteness Index of  
38  
39 Australia Plus score for each participant's postcode. Participants were asked about  
40  
41 their current marital status, highest educational qualification they had completed,  
42  
43 annual household income, and their level of healthcare insurance.  
44  
45

### 46 47 48 ***Health status measures***

49  
50 Participants were asked to rate their overall health and overall quality of life on a  
51  
52 five-point Likert scale. They were also asked about their history of smoking and  
53  
54 amount of alcohol consumption. Participants were provided with a list of diseases  
55  
56 (e.g. osteoarthritis, osteoporosis, asthma, cancer) and asked if they had been treated  
57  
58



1  
2  
3 for any of the disease in the last month. A positive response to this question for a  
4  
5 particular disease was used to determine if a participant had that disease.  
6  
7  
8

### 9 10 ***Statistical analyses***

11 The demographic and health status characteristics of omega-3 users and non-users  
12 were compared using chi-square tests. The chi-square tests were used to identify  
13 those variables to be included in the logistic regression model building. Logistic  
14 regression modelling, that commenced with significant demographic and health  
15 characteristics (identified in the chi-square tests), was conducted using a backward  
16 stepwise method, to parsimoniously predict use of w3 FA supplements. In response  
17 to the large sample size and multiple comparisons, a p-value <0.001 was adopted for  
18 statistical significance. All analyses were conducted using the statistical software SAS  
19  
20  
21  
22  
23  
24  
25  
26  
27  
28  
29 9.2.  
30  
31  
32  
33  
34  
35

## 36 **RESULTS**

37  
38 There were 266,846 participants who answered the question regarding consumption  
39 of w3 FA supplements, of which 86,939 (32.6%) indicated that they had taken w3 FA  
40 supplements in the 4 weeks prior to the survey.  
41  
42  
43  
44  
45  
46

47 Table 1 reports demographic characteristics of participants by w3 FA supplement  
48 use. There are statistically significant associations between w3 FA supplement use  
49 and gender, age, place of residence, education, household income, marital status, and  
50 health insurance (all  $p < 0.0001$ ).  
51  
52  
53  
54  
55  
56  
57  
58  
59  
60

1  
2  
3 INSERT TABLE 1 HERE  
4  
5  
6

7 Table 2 shows health status characteristics of participants by w3 FA supplement use.  
8  
9 There are statistically significant associations between w3 FA supplement use and  
10 smoking status, alcohol consumption, overall health, overall quality of life,  
11 osteoarthritis, asthma, cancer, high blood pressure, high cholesterol, thyroid  
12 problems, anxiety and depression (all  $p < 0.0001$ ).  
13  
14  
15  
16  
17  
18  
19

20 INSERT TABLE 2 HERE  
21  
22  
23

24  
25 The result of the multiple logistic regression modelling is presented in Table 3. Of all  
26 the diseases examined osteoarthritis, osteoporosis, high cholesterol, and anxiety  
27 and/or depression were positively associated with use of w3 FA supplements, while  
28 cancer and high blood pressure were negatively associated with the use of omega-3.  
29  
30 That is, the odds of w3 FA supplement use was 1.65 (99% CI: 1.55, 1.76) times greater  
31 for those participants reporting treatment for osteoarthritis compared to those  
32 without osteoarthritis. The odds of omega-3 use was 1.09 (99% CI: 1.01, 1.18) times  
33 greater for those participants reporting osteoporosis compared to those without  
34 osteoporosis. In comparison to participants reporting treatment for anxiety or  
35 depression, those participants with anxiety only or both anxiety and depression were  
36 1.16 (99% CI: 1.01, 1.34) and 1.19 (99% CI: 1.07, 1.32) times more likely to use w3 FA  
37 supplements, respectively. Those participants reporting treatment for high  
38 cholesterol were 1.23 (99% CI: 1.17, 1.29) times more likely to use omega-3 compared  
39 to those without high cholesterol. The odds of w3 FA supplement use was 0.89 (99%  
40  
41  
42  
43  
44  
45  
46  
47  
48  
49  
50  
51  
52  
53  
54  
55  
56  
57  
58  
59  
60

1  
2  
3 CI: 0.80, 0.99) and 0.95 (99% CI: 0.91, 0.99) times lower for those participants  
4  
5 reporting treatment for cancer and high blood pressure, respectively.  
6  
7

8  
9  
10 INSERT TABLE 3 HERE  
11

12  
13  
14 Table 3 also shows that those participants who rated their overall health to be fair or  
15  
16 poor were 0.82 (99% CI: 0.77, 0.86) less likely to use omega-3. In comparison to  
17  
18 current smokers, participants who were former smokers (OR=1.66; 99% CI: 1.53,  
19  
20 1.79) or never smoked (OR=1.56; 99% CI: 1.44, 1.69) were more likely to use w3 FA  
21  
22 supplements. In comparison to those participants who drank 0-6 alcoholic drinks  
23  
24 per week, participants who drank 14-20 alcoholic drinks (OR=0.94; 99% CI: 0.89,  
25  
26 1.00) or  $\geq 21$  alcoholic drinks (OR=0.83; 99% CI: 0.78, 0.89) were less likely to use  
27  
28 w3 FA supplements. Participants with no health insurance were 0.84 (99% CI: 0.80,  
29  
30 0.89) times less likely to use w3 FA supplements compared to participants with  
31  
32 private health insurance. In terms of household income, the odds of w3 FA  
33  
34 supplement use were 1.14 (99% CI: 1.08, 1.20) and 1.13 (99% CI: 1.06, 1.21) greater  
35  
36 for participants with an income of \$20,000-\$49,999 and \$50,000-\$69,999  
37  
38 respectively, compared to those with an income of <\$20,000. In comparison to those  
39  
40 participants who live in a major city, the odds of w3 FA supplement use are less for  
41  
42 those living in outer regional areas (OR=0.89; 99% CI: 0.85, 0.93) and remote or  
43  
44 very remote areas (OR=0.86; 99% CI: 0.75, 0.98). In comparison to those  
45  
46 participants aged 45-49 years, all other age groups have greater odds of w3 FA  
47  
48 supplement use, with the highest being those aged 60-69 (OR=1.84; 99% CI: 1.73,  
49  
50 1.96) and 70-79 (OR=1.76; 99% CI: 1.64, 1.90) years. In terms of gender, the odds of  
51  
52  
53  
54  
55  
56  
57  
58  
59  
60

1  
2  
3 w3 FA supplement use was 1.42 (99% CI: 1.36, 1.52) times greater for female  
4  
5 participants.  
6  
7  
8  
9

## 10 11 **DISCUSSION**

12  
13  
14 Our study, drawing upon the largest database with regards to w3 FA supplement use  
15 to date and constituting the first analyses of the profile of users and prevalence of use  
16 of w3 FA supplements in Australia, shows 32.6% of the study participants, aged 45  
17 years and older, consume w3 FA supplements. This finding identifies w3 FA  
18 supplements as one of the most commonly used dietary supplements amongst older  
19 Australians and is in line with previous research showing w3 FA supplements as  
20 among the top five complementary and alternative medicines recommended by  
21 Australian general practitioners and community pharmacists.[4] The discovery of  
22 such a high level of w3 FA supplement use amongst older Australians suggests that  
23 further research is needed to explore consumer behaviors and decision-making  
24 regarding w3 FA supplement use alongside assessing the possible health impacts of  
25 such consumption.  
26  
27  
28  
29  
30  
31  
32  
33  
34  
35  
36  
37  
38  
39  
40  
41  
42

43 Overall, the findings of association between being female, of increased age, having  
44 advanced education *and* higher use of w3 FA supplements are congruent with factors  
45 predicting broader complementary and alternative medicine use.[3 22] The  
46 association of w3 FA supplement use with higher annual income and private health  
47 insurance highlights the potential importance of cost of w3 FA supplement products  
48 with regards to consumption and this issue warrants further investigation. It is also  
49 important to note that w3 FA supplements, like many complementary and  
50  
51  
52  
53  
54  
55  
56  
57  
58  
59  
60

1  
2  
3 alternative medicine products more generally, is not currently subsidised by the  
4 Australian Pharmaceutical Benefits Scheme (a Federal government program  
5 providing subsidised prescription drugs to residents) and attracts a further 10%  
6 goods and services tax that prescription medicines do not. As such, cost issues  
7 associated with w3 FA supplementation may be more focused in our Australian  
8 population. Our finding of a positive association of w3 FA supplement use with  
9 higher annual income may also relate to the suggestion that socioeconomic status  
10 acts as a protective factor in health, with those having better life chances more likely  
11 to adopt self-care measures to maintain their health and quality of life.[23]  
12  
13  
14  
15  
16  
17  
18  
19  
20  
21  
22  
23

24 The low use of w3 FA supplements among participants resident in rural and remote  
25 areas compared to those respondents living in metropolitan locations contradicts the  
26 findings of previous research which show higher CAM use in rural areas in  
27 Australia.[24] However, it does reflect findings from some national and international  
28 studies which suggest lower rates of *commercial* or *pre-packaged* CAM product use  
29 amongst some rural populations, when compared to their urban counterparts, which  
30 may be associated with reduced access to these supplements. [24] Indeed, the urban-  
31 rural divide in the use of complementary and alternative medicine is an issue that  
32 has received much attention in recent years[24-26] and the results from our study  
33 help add to the evidence-base and discussion of this important health service issue  
34 and highlight the need for further investigation into the complexities of regional  
35 variation in supplement use.  
36  
37  
38  
39  
40  
41  
42  
43  
44  
45  
46  
47  
48  
49  
50  
51  
52

53 The variations in the association of w3 FA supplement use with a range of clinical  
54 conditions are noteworthy, especially given the current varied clinical evidence-base  
55  
56  
57  
58  
59  
60

1  
2  
3 of w3 FA supplements. The finding of low w3 FA supplement use amongst people  
4  
5 with cancer is not unexpected as research evidence suggests no association between  
6  
7 w3 FA supplements and reducing cancer incidence.[10] Additionally, external factors  
8  
9 may also result in lower omega-3 supplement use amongst people with cancer:  
10  
11 patients may relinquish their CAM use when their use of other forms of medical  
12  
13 treatment increases;[27] or patients may be advised to cease all other medications  
14  
15 when undergoing cancer treatment.[28] However, it is somewhat surprising that  
16  
17 high blood pressure is negatively associated with the use of w3 FA supplement as  
18  
19 there is evidence that omega-3 has beneficial effects in the context of cardiovascular  
20  
21 disease and in lowering blood pressure.[29] This is an area worthy of further  
22  
23 empirical investigation.  
24  
25  
26  
27  
28

29 The association of higher w3 FA supplement use with diseases such as osteoarthritis,  
30  
31 osteoporosis, anxiety and/or depression is interesting given there is currently either  
32  
33 conflicting or insufficient evidence on the efficacy of W3 FA supplements in  
34  
35 addressing these conditions – this suggests there may currently exist a mismatch  
36  
37 between clinical evidence and consumers' perceptions of evidence and benefits  
38  
39 regarding w3 FA supplement use. Together, these study findings highlight the  
40  
41 potential need for nutrition guidelines for w3 FA supplement intake and consumer  
42  
43 awareness of the use of w3 FA supplements as well as possible enhanced information  
44  
45 and labeling of relevant products in Australia. The study findings also add weight to  
46  
47 recently identified evidence illustrating a desire for good quality information about  
48  
49 w3 FA supplement products amongst GPs and pharmacists.[4]  
50  
51  
52  
53  
54  
55  
56  
57  
58  
59  
60

1  
2  
3 The finding that respondents with better quality of life/health ratings or a healthy  
4 lifestyle (e.g. non-smoking and/or having less alcoholic drinks) have greater odds of  
5 w3 FA supplement use may indicate that w3 FA supplements are used for both the  
6 treatment of specific health conditions and as a preventive therapy. Previous  
7 research suggests that this distinction between therapeutic and preventive use also  
8 exists for complementary and alternative medicine consumption more broadly.[30]  
9  
10 Given these results, it would be useful for future studies to differentiate between  
11 these two approaches (therapeutic and preventive use) to use and to provide critical,  
12 in-depth examination of patients' motivations and understandings regarding  
13 consumption of w3 FA supplements and other CAM or dietary supplements.  
14  
15  
16  
17  
18  
19  
20  
21  
22  
23  
24  
25  
26

27 The interpretation of our findings is limited by the fact that the association between  
28 w3 FA supplement consumption with particular health conditions does not  
29 necessarily imply that w3 FA supplements have been used specifically for these  
30 conditions. In addition, the disease variable used from the 45 and Up Study survey  
31 was based on individuals reporting that they had been 'treated in last month' rather  
32 than 'ever been diagnosed' and that health, w3 FA supplement use and health care  
33 use is self-reported by the participants. As such our study results may be subject to  
34 recall bias and we may have missed some participants who had a disease but were  
35 not treated for it in the month prior to being surveyed. Currently this study focuses  
36 solely on the use of W3 FA supplements, and this research may have benefitted by  
37 including an analysis of usual dietary intake (e.g. food frequency questionnaire), in  
38 particular the consumption of omega 3 rich foods such as oily fish that may be also  
39 be consumed for therapeutic benefit. Given the sample of 45 and Up Study was  
40 drawn from the State of New South Wales, generalisation of the findings of this  
41  
42  
43  
44  
45  
46  
47  
48  
49  
50  
51  
52  
53  
54  
55  
56  
57  
58  
59  
60

1  
2  
3 research to other parts of Australia should be treated with caution and as the study  
4  
5 sample has been shown to be not representative of the New South Wales population  
6  
7 on a number of characteristics, caution should be made in generalising the findings  
8  
9 to the New South Wales population. Finally, as the statistical tests used in our  
10  
11 analyses are influenced by sample size, the very large sample size in this study can  
12  
13 make small difference appear to be significant. As such, readers need to take into  
14  
15 account the absolute differences when interpreting the odds ratios. Nevertheless,  
16  
17 these limitations are countered by the insights gained from analysing data from the  
18  
19 largest sample of adults aged 45 years and older with regards to their consumption of  
20  
21 w3 FA supplements.  
22  
23  
24  
25  
26  
27  
28

## 29 **CONCLUSION**

30  
31  
32 Our analysis of data from the 45 and Up Study cohort suggests that W3 FA  
33  
34 supplements are consumed for a wide variety of purposes by a considerable  
35  
36 proportion of Australians aged 45 years and over. In the context of these study  
37  
38 findings there is a need for primary health care practitioners to enquire with their  
39  
40 patients about their use of w3 FA supplements as well as for further work to ensure  
41  
42 provision of good quality information for patients and providers with regards to w3  
43  
44 FA products.  
45  
46  
47  
48  
49  
50  
51  
52  
53  
54  
55  
56  
57  
58  
59  
60



**Table 1 Demographic characteristic of people aged 45 years and older by w3 FA supplement use**

| Demographic Characteristics    | Use of w3 FA supplements   |             | p-value  |         |
|--------------------------------|----------------------------|-------------|----------|---------|
|                                | Yes                        | No          |          |         |
|                                | (n=86,939)                 | (n=179,907) |          |         |
|                                | % (SE)                     | % (SE)      |          |         |
| <b>Sex</b>                     | Female                     | 60 (0.2)    | 51 (0.1) | <0.0001 |
|                                | Male                       | 40 (0.2)    | 49 (0.1) |         |
| <b>Age (years)</b>             | 45-49                      | 10 (0.1)    | 14 (0.1) | <0.0001 |
|                                | 50-59                      | 32 (0.2)    | 34 (0.1) |         |
|                                | 60-69                      | 32 (0.2)    | 26 (0.1) |         |
|                                | 70-79                      | 17 (0.1)    | 15 (0.1) |         |
|                                | 80+                        | 9 (0.1)     | 11 (0.1) |         |
| <b>Place of Residence</b>      | Major city                 | 45 (0.2)    | 45 (0.1) | <0.0001 |
|                                | Inner regional             | 36 (0.2)    | 35 (0.1) |         |
|                                | Outer regional             | 17 (0.1)    | 18 (0.1) |         |
|                                | Remote/very remote         | 2 (0.1)     | 2 (0.1)  |         |
| <b>Education</b>               | School Certificate or less | 34 (0.2)    | 34 (0.1) | 0.0001  |
|                                | Higher School Certificate  | 10 (0.1)    | 10 (0.1) |         |
|                                | Trade/certificate/diploma  | 33 (0.2)    | 32 (0.1) |         |
|                                | Tertiary                   | 23 (0.1)    | 24 (0.1) |         |
| <b>Annual Household Income</b> | < \$20000                  | 25 (0.1)    | 25 (0.1) | <0.0001 |
|                                | \$20000-\$49999            | 33 (0.2)    | 31 (0.1) |         |
|                                | \$50000-\$69999            | 14 (0.1)    | 13 (0.1) |         |

|                       |                      |          |          |         |
|-----------------------|----------------------|----------|----------|---------|
|                       | ≥ \$70000            | 28 (0.2) | 31 (0.1) |         |
| <b>Marital Status</b> | Married/defacto      | 75 (0.1) | 75 (0.1) | <0.0001 |
|                       | Widow/divorce/separ. | 20 (0.1) | 19 (0.1) |         |
|                       | Single               | 5 (0.1)  | 6 (0.1)  |         |
| <b>Health</b>         | Private              | 55 (0.2) | 53 (0.1) | <0.0001 |
| <b>Insurance</b>      | DVA or HCC           | 30 (0.2) | 29 (0.1) |         |
|                       | None                 | 15 (0.1) | 18 (0.1) |         |

---

\* SE = Standard Error

**Table 2 Health status characteristics of people aged 45 years and older by w3 FA supplement use**

| Health Status Characteristics  | Use of w3 FA supplements |             | p-value |
|--------------------------------|--------------------------|-------------|---------|
|                                | Yes                      | No          |         |
|                                | (n=86,939)               | (n=179,907) |         |
|                                | % (SE)                   | % (SE)      |         |
| <b>Smoking Status</b>          |                          |             |         |
| Current smoker                 | 5 (0.1)                  | 8 (0.1)     | <0.0001 |
| Former smoker                  | 36 (0.2)                 | 35 (0.1)    |         |
| Never smoked                   | 59 (0.2)                 | 56 (0.1)    |         |
| <b>Alcohol Consumption</b>     |                          |             |         |
| 0-6 drinks per week            | 64 (0.2)                 | 62 (0.1)    | <0.0001 |
| 7-13 drinks per week           | 19 (0.1)                 | 19 (0.1)    |         |
| 14-20 drinks per week          | 11 (0.1)                 | 11 (0.1)    |         |
| ≥ 21 drinks per week           | 6 (0.1)                  | 8 (0.1)     |         |
| <b>Overall Health</b>          |                          |             |         |
| Excellent/very good/good       | 87 (0.1)                 | 85 (0.1)    | <0.0001 |
| Fair/poor                      | 13 (0.1)                 | 15 (0.1)    |         |
| <b>Overall Quality Of Life</b> |                          |             |         |
| Excellent/very good/good       | 90 (0.1)                 | 89 (0.1)    | <0.0001 |
| Fair/poor                      | 10 (0.1)                 | 11 (0.1)    |         |
| <b>Osteoarthritis</b>          |                          |             |         |
| Yes                            | 11 (0.1)                 | 7 (0.1)     | <0.0001 |
| No                             | 89 (0.1)                 | 93 (0.1)    |         |
| <b>Osteoporosis</b>            |                          |             |         |
| Yes                            | 7 (0.1)                  | 5 (0.1)     | <0.0001 |
| No                             | 93 (0.1)                 | 95 (0.1)    |         |

|                                 |                 |          |          |         |
|---------------------------------|-----------------|----------|----------|---------|
| <b>Asthma</b>                   | Yes             | 5 (0.1)  | 4 (0.1)  | <0.0001 |
|                                 | No              | 95 (0.1) | 96 (0.1) |         |
| <b>Cancer</b>                   | Yes             | 2 (0.1)  | 3 (0.1)  | <0.0001 |
|                                 | No              | 98 (0.1) | 97 (0.1) |         |
| <b>High Blood Pressure</b>      | Yes             | 26 (0.1) | 24 (0.1) | <0.0001 |
|                                 | No              | 74 (0.1) | 76 (0.1) |         |
| <b>High Cholesterol</b>         | Yes             | 17 (0.1) | 14 (0.1) | <0.0001 |
|                                 | No              | 83 (0.1) | 86 (0.1) |         |
| <b>Heart Attack or Angina</b>   | Yes             | 3 (0.1)  | 3 (0.1)  | 0.2996  |
|                                 | No              | 97 (0.1) | 97 (0.1) |         |
| <b>Other Heart Disease</b>      | Yes             | 3 (0.1)  | 3 (0.1)  | 0.6606  |
|                                 | No              | 97 (0.1) | 97 (0.1) |         |
| <b>Thyroid Problems</b>         | Yes             | 6 (0.1)  | 5 (0.1)  | <0.0001 |
|                                 | No              | 94 (0.1) | 95 (0.1) |         |
| <b>Anxiety &amp; Depression</b> | Neither         | 91 (0.1) | 92 (0.1) | <0.0001 |
|                                 | Depression only | 4 (0.1)  | 4 (0.1)  |         |
|                                 | Anxiety only    | 2 (0.1)  | 1 (0.1)  |         |
|                                 | Both            | 3 (0.1)  | 3 (0.1)  |         |

---

\* SE = Standard Error

**Table 3 Multiple logistic regression model for predicting use of w3 FA supplements in people aged 45 years and older**

| <b>Factor</b>                  |                    | <b>Odds Ratio</b> | <b>99% C.I.</b> |
|--------------------------------|--------------------|-------------------|-----------------|
| <b>Sex</b>                     | Male               | 1.00              | —               |
|                                | Female             | 1.42              | 1.37, 1.48      |
| <b>Age</b>                     | 45-49              | 1.00              | —               |
|                                | 50-59              | 1.43              | 1.36, 1.52      |
|                                | 60-69              | 1.84              | 1.73, 1.96      |
|                                | 70-79              | 1.76              | 1.64, 1.90      |
|                                | 80+                | 1.32              | 1.21, 1.44      |
| <b>Place of Residence</b>      | Major city         | 1.00              | —               |
|                                | Inner regional     | 0.98              | 0.95, 1.02      |
|                                | Outer regional     | 0.89              | 0.85, 0.93      |
|                                | Remote/very remote | 0.86              | 0.75, 0.98      |
| <b>Annual Household Income</b> | < \$20000          | 1.00              | —               |
|                                | \$20000-\$49999    | 1.14              | 1.08, 1.20      |
|                                | \$50000-\$69999    | 1.13              | 1.06, 1.21      |
|                                | ≥ \$70000          | 1.03              | 0.97, 1.10      |
| <b>Insurance</b>               | Private            | 1.00              | —               |
|                                | DVA or HCC         | 0.93              | 0.89, 0.98      |
|                                | None               | 0.84              | 0.80, 0.89      |
| <b>Smoking</b>                 | Current smoker     | 1.00              | —               |

|                                 |                          |      |            |
|---------------------------------|--------------------------|------|------------|
| <b>Status</b>                   | Former smoker            | 1.66 | 1.53, 1.79 |
|                                 | Never smoked             | 1.56 | 1.44, 1.69 |
| <b>Alcohol Consumption</b>      | 0-6 drinks per week      | 1.00 | —          |
|                                 | 7-13 drinks per week     | 1.02 | 0.97, 1.07 |
|                                 | 14-20 drinks per week    | 0.94 | 0.89, 1.00 |
|                                 | ≥ 21 drinks per week     | 0.83 | 0.78, 0.89 |
| <b>Overall Health</b>           | Excellent/very good/good | 1.00 | —          |
|                                 | Fair/poor                | 0.82 | 0.77, 0.86 |
| <b>Osteoarthritis</b>           | No                       | 1.00 | —          |
|                                 | Yes                      | 1.65 | 1.55, 1.76 |
| <b>Osteoporosis</b>             | No                       | 1.00 | —          |
|                                 | Yes                      | 1.09 | 1.01, 1.18 |
| <b>Cancer</b>                   | No                       | 1.00 | —          |
|                                 | Yes                      | 0.89 | 0.80, 0.99 |
| <b>High Blood Pressure</b>      | No                       | 1.00 | —          |
|                                 | Yes                      | 0.95 | 0.91, 0.99 |
| <b>High Cholesterol</b>         | No                       | 1.00 | —          |
|                                 | Yes                      | 1.23 | 1.17, 1.29 |
| <b>Anxiety &amp; Depression</b> | Neither                  | 1.00 | —          |
|                                 | Depression only          | 1.01 | 0.92, 1.11 |
|                                 | Anxiety only             | 1.16 | 1.01, 1.34 |
|                                 | Both                     | 1.19 | 1.07, 1.32 |

1  
2  
3  
4  
5  
6  
7  
8  
9  
10  
11  
12  
13  
14  
15  
16  
17  
18  
19  
20  
21  
22  
23  
24  
25  
26  
27  
28  
29  
30  
31  
32  
33  
34  
35  
36  
37  
38  
39  
40  
41  
42  
43  
44  
45  
46  
47  
48  
49  
50  
51  
52  
53  
54  
55  
56  
57  
58  
59  
60

## Glossary

|                    |                                        |
|--------------------|----------------------------------------|
| CAM                | Complementary and alternative medicine |
| DHA                | Docosahexaenoic acid                   |
| EPA                | Eicosapentaenoic acid                  |
| GP                 | General Practitioner                   |
| Omega-3 Fatty Acid | w3 FA                                  |

For peer review only

## ACKNOWLEDGEMENTS

We thank the men and women participating in the 45 and Up Study. The 45 and Up study is managed by the Sax Institute in collaboration with major partner Cancer Council New South Wales, and partners: the National Heart Foundation of Australia (NSW Division); NSW Health; *beyondblue: the national depression initiative*; Ageing, Disability and Home Care, Department of Human Services NSW; and UnitingCare Ageing.

## COMPETING INTERESTS

None.

## FUNDING

This research received no specific grant from any funding agency in the public, commercial or not-for-profit sectors.

## AUTHORS CONTRIBUTION

All authors devised the study and helped to conceptualize ideas, interpret findings, manuscript writing and reviewing drafts of the article. JA and DS acquired the data from the 45 and Up Study. DS undertook data analysis and JA, DS, CL, AB, JW



1  
2  
3  
4  
5  
6  
7  
8  
9  
10  
11  
12  
13  
14  
15  
16  
17  
18  
19  
20  
21  
22  
23  
24  
25  
26  
27  
28  
29  
30  
31  
32  
33  
34  
35  
36  
37  
38  
39  
40  
41  
42  
43  
44  
45  
46  
47  
48  
49  
50  
51  
52  
53  
54  
55  
56  
57  
58  
59  
60

contributed to the interpretation of the data. All authors read and approved the final manuscript.

## DATA SHARING STATEMENT

There are no additional data available.

For peer review only

## REFERENCES

1. Gahche J, Bailey R, Burt V, et al. Dietary Supplement Use Among U.S. Adults Has Increased Since NHANES III (1988–1994). NCHS Data Brief. Atlanta: Centers for Disease Control and Prevention, 2011:1-8.
2. Skeie G, Braaten T, Hjartåker A, et al. Use of dietary supplements in the European Prospective Investigation into Cancer and Nutrition calibration study. *Eur J Clin Nutr* 2009;**63**:226-38
3. Barnes PM, Bloom B, Nahin RL. Complementary and Alternative Medicine Use Among Adults and Children: United States, 2007 Hyattsville: U.S. Department of Health and Human Services, Division of Health Interview Statistics, Centers for Disease Control and Prevention, National Center for Health Statistics, 2008.
4. Brown J, Morgan T, Adams J, et al. Complementary Medicines Information Use and Needs of Health Professionals: General Practitioners and Pharmacists. Sydney: National Prescribing Service, 2008.
5. Chowdhury R, Stevens S, Gorman D, et al. Association between fish consumption, long chain omega 3 fatty acids, and risk of cerebrovascular disease: Systematic review and meta-analysis. *BMJ* 2012;**345**(e6698)
6. Filion KB, El Khoury F, Bielinski M, et al. Omega-3 fatty acids in high-risk cardiovascular patients: a meta-analysis of randomized controlled trials. *BMC Cardiovasc Disord* 2010;**10**(24)
7. Kromhout D, Yasuda S, Geleijnse JM, et al. Fish oil and omega-3 fatty acids in cardiovascular disease: do they really work? *European Heart Journal* 2012;**33**:436–43
8. Rizos EC, Ntzani EE, Bika E, et al. Association between omega-3 fatty acid supplementation and risk of major cardiovascular disease events: a systematic review and meta-analysis. *JAMA* 2012;**308**(10):1024-33
9. National Heart Foundation of Australia. Position Statement: Fish, Fish Oils, n-3 Polyunsaturated Fatty Acids and Cardiovascular Health. Sydney: National Heart Foundation of Australia, 2008.

10. MacLean CH, Newberry SJ, Mojica WA, et al. Effects of omega-3 fatty acids on cancer risk: a systematic review. *JAMA: Journal of the American Medical Association* 2006;**295**(4):403-15
11. Colomera R, Moreno-Nogueiraa JM, García-Lunaa PP, et al. N-3 fatty acids, cancer and cachexia: a systematic review of the literature. *British Journal of Nutrition* 2007;**97**(5):823-31
12. Lin P-Y, Su K-P. A meta-analytic review of double-blind, placebo-controlled trials of antidepressant efficacy of Omega-3 fatty acids. *Journal of Clinical Psychiatry* 2007;**68**(7):1056-61
13. Montgomery P, Richardson AJ. Omega-3 fatty acids for bipolar disorder. *Cochrane Database of Systematic Reviews* 2008(2):Art. No.: CD005169. DOI: 10.1002/14651858.CD005169.pub2
14. Thien FCK, De Luca S, Woods RK, et al. Dietary marine fatty acids (fish oil) for asthma in adults and children. *Cochrane Database of Systematic Reviews* 2002(2):Art. No.: CD001283. DOI: 10.1002/14651858.CD001283
15. Oliver C, Everard M, N'Diaye T. Omega-3 fatty acids (from fish oils) for cystic fibrosis. *Cochrane Database of Systematic Reviews* 2007(4)
16. Agency for Healthcare Research and Quality. Effects of omega-3 fatty acids on lipids and glycemic control in type II diabetes and the metabolic syndrome and on inflammatory bowel disease, rheumatoid arthritis, renal disease, systemic lupus erythematosus, and osteoporosis. Rockville: Agency for Healthcare Research and Quality, 2004.
17. Sydenham E, Dangour AD, Lim W-S. Omega 3 fatty acid for the prevention of cognitive decline and dementia. *Cochrane Database of Systematic Reviews* 2012(6) doi: 10.1002/14651858.CD005379.pub3[published Online First: Epub Date]].
18. James S, Montgomery P, Williams K. Omega-3 fatty acids supplementation for autism spectrum disorders (ASD). *Cochrane Database of Systematic Reviews* 2011(11) doi: 10.1002/14651858.CD007992.pub2[published Online First: Epub Date]].
19. Kickbusch I, Payne L. Twenty-first century health promotion: the public health revolution meets the wellness revolution. *Health Promotion International* 2003;**18**(4):275-78

- 1  
2  
3 20. 45 and Up Study Collaborators. Cohort profile: the 45 and Up Study.  
4 International Journal of Epidemiology 2008;**37**:941-47  
5  
6 21. Mealing N, Banks E, Jorm L, et al. Investigation of relative risk estimates from  
7 studies of the same population with contrasting response rates and designs.  
8 BMC Medical Research Methodology 2010;**10**(26)  
9  
10 22. Adams J, Sibbritt D, Easthope G, et al. The profile of women who consult  
11 alternative health practitioners in Australia. Medical Journal of Australia  
12 2003;**179**:297-300  
13  
14 23. Cockerham WC. Health lifestyles: Bringing structure back. In: Cockerham WC,  
15 ed. The New Blackwell Companion to Medical Sociology. Oxford: Wiley-  
16 Blackwell, 2009:159-83.  
17  
18 24. Wardle J, Lui C-W, Adams J. Complementary and alternative medicine in rural  
19 communities: current research and future directions. Journal of Rural Health  
20 2012;**28**(1):101-12  
21  
22 25. Adams J, Sibbritt D, Lui C-W. The urban-rural divide in complementary and  
23 alternative medicine use: a longitudinal study of 10,638 women. BMC  
24 Complementary and Alternative Medicine 2011;**11**(2)  
25  
26 26. Adams J. Exploring the interface between complementary and alternative  
27 medicine (CAM) and rural general practice: A call for research. Health and  
28 Place 2004;**10**(3):285-87  
29  
30 27. Sibbritt DW, Adams J, Young AF. A longitudinal analysis of mid-age women's use  
31 of complementary and alternative medicine (CAM) in Australia, 1996-1998.  
32 Women Health 2004;**40**(4):41-56  
33  
34 28. Broom A, Adams J. Oncology clinicians' accounts of discussing complementary  
35 and alternative medicine with their patients. Health 2009;**13**(3):317-36  
36  
37 29. Wang C, Harris WS, Chung M, et al. N-3 Fatty acids from fish or fish-oil  
38 supplements, but not alpha-linolenic acid, benefit cardiovascular disease  
39 outcomes in primary- and secondary-prevention studies: a systematic review.  
40 Am J Clin Nutr 2006;**84**(1):5-17  
41  
42 30. Bishop FL, Yardley L, Lewith GT. Treat or treatment - a qualitative study  
43 analyzing patients' use of CAM. American Journal of Public Health  
44 2008;**98**(9):1700-05  
45  
46  
47  
48  
49  
50  
51  
52  
53  
54  
55  
56  
57  
58  
59  
60

# TITLE PAGE

**Omega-3 Fatty Acid Supplement Use: ~~An Analysis of 266,848 Australians~~  
aged in the 45 Years and OlderUp Study Cohort**

Jon Adams

Professor, Faculty of Health, University of Technology Sydney, Sydney, Australia

David Sibbritt

Professor, Faculty of Health, University of Technology Sydney, Sydney, Australia

Chi-Wai Lui

Lecturer, School of Population Health, University of Queensland, Brisbane, Australia

Alex Broom

Associate Professor, School of Social Science, University of Queensland, Brisbane,

Australia

Jonathan Wardle

Research Fellow, Faculty of Health, University of Technology Sydney, Sydney,

Australia

1  
2  
3 *Correspondence:*  
4

5 Jon Adams  
6

7 Faculty of Health  
8

9 University of Technology Sydney  
10

11 Level 7 Building 10, 235-253 Jones Street  
12

13 Ultimo New South Wales 2007, Australia  
14

15 Email: [jon.adams@uts.edu.au](mailto:jon.adams@uts.edu.au)  
16

17 Phone: +61 2 9514 4821  
18

19 Fax: +61 2 9514 4835  
20  
21  
22  
23  
24  
25  
26  
27

28 **Keywords**  
29

30 Omega-3, fish oils, dietary supplements, utilization, adult  
31  
32  
33  
34  
35

36 **Word Count**  
37

38 2,933 words  
39  
40  
41  
42  
43  
44  
45  
46  
47  
48  
49  
50  
51  
52  
53  
54  
55  
56  
57  
58  
59  
60

## ABSTRACT

*Objective:* There has been a dramatic increase in the use of dietary supplements in Western societies over the past decades. Our understanding of the prevalence of omega-3 fatty acid supplement consumption is of significance for future nutrition planning, health promotion and care delivery. However, we know little about omega-3 fatty acid supplement consumption or users. This paper, drawing upon the largest dataset with regards to omega-3 fatty acid supplement use (n=266,848), examines the use and users of this supplement amongst a large sample of older Australians living in New South Wales.

*Design:* Cross-sectional study. Data were analysed from the 45 and Up Study, the largest study of healthy ageing ever undertaken in the Southern Hemisphere.

*Setting:* New South Wales, Australia.

*Participants:* 266,848 participants of the 45 and Up Study.

*Primary and Secondary Outcome Measures:* Participants' use of omega-3, demographics (geographical location, marital status, education level, income and level of healthcare insurance) and health status (quality of life, history of smoking and alcohol consumption, health conditions) were measured.

1  
2  
3 *Results:* Of the 266,848 participants, 32.6% reported having taken omega-3 in the 4  
4 weeks prior to the survey. Use of omega-3 fatty acid supplements was higher among  
5 female, non-smokers, non- to mild (alcoholic) drinkers, residing in a major city,  
6  
7 having higher income and private health insurance. Osteoarthritis, osteoporosis,  
8  
9 high cholesterol, and anxiety and/or depression were positively associated with  
10  
11 omega-3 fatty acid supplement use, while cancer and high blood pressure were  
12  
13 negatively associated with use of omega 3 fatty acid supplements.  
14  
15  
16  
17  
18  
19

20  
21 *Conclusions:* This study, [analysing data from the 45 and Up Study cohort](#), suggests  
22 that a considerable proportion of older Australians consume omega-3 fatty acid  
23 supplements. There is a need for primary healthcare practitioners to enquire with  
24 patients about this supplement use and for work to ensure provision of good quality  
25 information for patients and providers with regards to omega-3 fatty acid products.  
26  
27  
28  
29  
30  
31  
32  
33  
34  
35  
36  
37  
38  
39  
40  
41  
42  
43  
44  
45  
46  
47  
48  
49  
50  
51  
52  
53  
54  
55  
56  
57  
58  
59  
60



# ARTICLE SUMMARY

## Article Focus

- The use of dietary supplements has increased rapidly in Western societies over past decades.
- Our study examines the use of omega-3 fatty acid supplements amongst older Australians, drawing upon the largest study of healthy ageing undertaken in the Southern Hemisphere (n=266,848).

## Key Messages

- A considerable proportion of older Australians living in New South Wales (32.6%) report using omega-3 fatty acid supplements.
- People with osteoarthritis, osteoporosis, high cholesterol, and anxiety and/or depression were more likely to use omega-3 fatty acid supplements, while people with cancer and high blood pressure were less likely to use omega 3 fatty acid supplements.
- There is a need to ensure provision of good quality information for patients and providers with regards to omega-3 fatty acid supplement products.

## Strengths and Limitations of this Study

- Our study benefits from the use of the largest sample of Australians aged 45 years and older with regards to the consumption of omega-3 fatty acid supplement.

- 1
  - 2
  - 3
  - 4
  - 5
  - 6
  - 7
  - 8
  - 9
  - 10
  - 11
  - 12
  - 13
  - 14
  - 15
  - 16
  - 17
  - 18
  - 19
  - 20
  - 21
  - 22
  - 23
  - 24
  - 25
  - 26
  - 27
  - 28
  - 29
  - 30
  - 31
  - 32
  - 33
  - 34
  - 35
  - 36
  - 37
  - 38
  - 39
  - 40
  - 41
  - 42
  - 43
  - 44
  - 45
  - 46
  - 47
  - 48
  - 49
  - 50
  - 51
  - 52
  - 53
  - 54
  - 55
  - 56
  - 57
  - 58
  - 59
  - 60
- The interpretation of our findings is limited by the fact that the use of omega-3 fatty acid supplement was self-reported by the participants and their answers may have been subject to recall bias.

For peer review only

## MAIN TEXT

### **Omega-3 Fatty Acid Supplement Use: An Analysis of 266,848 Australians aged 45 Years and Older in the 45 and Up Study Cohort**

#### INTRODUCTION

There has been a dramatic increase in the use of dietary supplements in Western industrialized societies over the past few decades. The proportion of American adults using at least one dietary supplement has increased from 42% to 53% between 1994 and 2006.[1] Research also shows the use of dietary supplements is common in European countries such as Denmark (66% of men and 51% of women) and the United Kingdom (48% of women and 36% of men).[2]

In 2007, a national US survey identified omega-3 fatty acid (w3 FA) supplements (products containing docosahexaenoic acid (DHA) and eicosapentaenoic acid (EPA) products) as the first (for adults) and second (for children) most commonly used natural (non-vitamin, non-mineral) product in America.[3] In Australia, a substantial proportion of GPs (80.3%) and community pharmacists (90.2%) recommend omega-3 to patients[4] and findings from this Australian research also identify w3 FA supplement as among the top five complementary and alternative medicines about which healthcare professionals (71.6% of GP and 71.7% of pharmacists) desire better quality information.

1  
2  
3 The clinical evidence base for w3 FA supplement use is varied depending on the  
4 specific condition. There is evidence that w3 FA supplements help in preventing or  
5 benefiting the outcomes of cardiovascular disease with some evidence suggesting a  
6 cholesterol lowering effect.[5-7] However, a meta-analysis study released in 2012  
7 found no relation between use of w3 FA supplements and reduced risk of major  
8 cardiovascular diseases.[8] At present, the National Heart Foundation of Australia  
9 recommends all Australian adults consume about 500 mg (or 1,000 mg for those  
10 who have documented coronary heart disease) of w3 FA per day.[9]

11  
12  
13 Beyond cardiovascular disease, existing research has found no evidence of a  
14 significant association between w3 FA supplement use and reducing cancer  
15 incidence.[10] However, there is some evidence that w3 FA supplements may  
16 improve clinical, biological and quality of life parameters amongst patients with  
17 advanced cancer.[11] There is currently conflicting or insufficient scientific evidence  
18 on the efficacy of w3 FA supplements regarding improvement of mental health  
19 disorders,[12 13] asthma,[14] cystic fibrosis,[15] rheumatoid arthritis, inflammatory  
20 bowel disease and osteoporosis[16] and cognitive functions affected by aging,  
21 dementia, and neurological diseases.[17 18]

22  
23  
24 Given the rise of population ageing and increasing public awareness of the  
25 importance of preventive health,[19] knowledge about consumption of dietary  
26 supplements such as w3 FA is of significance for future health promotion and health  
27 care delivery. In response, this paper describes the findings of the first study to  
28 examine the use of w3 FA supplements in Australia. It aims to provide analysis of the

1  
2  
3 prevalence and characteristics of omega-3 use amongst a large sample of Australians  
4  
5 (n=266,848) aged 45 years and older.  
6  
7  
8  
9

## 10 11 **METHOD**

### 12 13 ***Sample***

14  
15 This research utilised data collected through the 45 and Up Study, which is the  
16  
17 largest study of healthy ageing conducted in the Southern Hemisphere and analyses  
18  
19 data from 266,848 men and women aged 45 and older who reside in the State of New  
20  
21 South Wales, Australia. The 45 and Up study is described in detail elsewhere,[20] but  
22  
23 briefly, individuals aged 45 years and over and resident in New South Wales were  
24  
25 randomly selected from the Medicare Australia database, which provides virtually  
26  
27 complete coverage of the general population. Eligible individuals were mailed an  
28  
29 invitation to take part, an information leaflet, the study questionnaire and consent  
30  
31 form and a reply paid envelope (available at [www.45andUp.org.au](http://www.45andUp.org.au)). Participants  
32  
33 joined the 45 and Up Study by completing the questionnaire and consent form and  
34  
35 mailing them to the Study coordinating centre. The study over-sampled, by a factor  
36  
37 of two, individuals aged 80 years and over and people resided in rural areas; all  
38  
39 residents of remote areas were sampled. The 45 and Up Study sample included  
40  
41 approximately 10% of the general population in the target age range. Recruitment  
42  
43 began in February 2006 and the analyses reported in this paper relate to the 266,848  
44  
45 participants joining the study at the close of December, 2009. The overall response  
46  
47 rate to the mailed invitations to join the study is estimated to be 17.9%, however, the  
48  
49 exact response rate is difficult to specify as some people may not have received the  
50  
51 invitation if their address details were incorrect in the Medicare Australia  
52  
53  
54  
55  
56  
57  
58  
59  
60

1  
2  
3 database.[20] The 45 and Up study sample has excellent heterogeneity and - in  
4 comparison to the (State of ) New South Wales Population Health Survey - is  
5 reasonably representative of the (State of)-New South Wales population; in terms of  
6 gender, age and education; although there were differences in terms of primary  
7 language, health insurance, smoking status, psychological distress, and diagnosis of  
8 some health conditions.[21] Further, the study has a response rate comparable to  
9 similar studies internationally and in Australia;<sup>2</sup> and is among the most  
10 representative large scale cohort studies in the world.[21] The 45 and Up Study  
11 received ethics approval from the University of New South Wales Human Research  
12 Ethics Committee.

### ***Use of Omega-3***

13  
14  
15  
16  
17  
18  
19  
20  
21  
22  
23  
24  
25  
26  
27  
28  
29  
30  
31  
32  
33  
34  
35  
36  
37  
38  
39  
40  
41  
42  
43  
44  
45  
46  
47  
48  
49  
50  
51  
52  
53  
54  
55  
56  
57  
58  
59  
60

Participants were defined as being an w3 FA supplement user if they answered ‘yes’ to the following question: ‘In the past 4 weeks have you taken fish oil or Omega-3.’

### ***Demographic measures***

Area of residence was assigned according to the Accessibility Remoteness Index of Australia Plus score for each participant’s postcode. Participants were asked about their current marital status, highest educational qualification they had completed, annual household income, and their level of healthcare insurance.

### ***Health status measures***

Participants were asked to rate their overall health and overall quality of life on a five-point Likert scale. They were also asked about their history of smoking and amount of alcohol consumption. Participants were provided with a list of diseases

1  
2  
3 (e.g. osteoarthritis, osteoporosis, asthma, cancer) and asked if they had been treated  
4  
5 for any of the disease in the last month. A positive response to this question for a  
6  
7 particular disease was used to determine if a participant had that disease.  
8  
9

### 10 11 **Statistical analyses**

12  
13 The demographic and health status characteristics of omega-3 users and non-users  
14  
15 were compared using chi-square tests. The chi-square tests were used to identify  
16  
17 those variables to be included in the logistic regression model building. Logistic  
18  
19 regression modelling, that included all commenced with significant demographic and  
20  
21 health characteristics, (identified in the chi-square tests), was conducted using a  
22  
23 backward stepwise method, to parsimoniously predict use of w3 FA supplements. In  
24  
25 response to the large sample size and multiple comparisons, a p-value <0.001 was  
26  
27 adopted for statistical significance. All analyses were conducted using the statistical  
28  
29 software SAS 9.2.  
30  
31  
32  
33  
34  
35  
36  
37

## 38 **RESULTS**

39  
40 There were 266,846 participants who answered the question regarding consumption  
41  
42 of w3 FA supplements, of which 86,939 (32.6%) indicated that they had taken w3 FA  
43  
44 supplements in the 4 weeks prior to the survey.  
45  
46  
47  
48

49 Table 1 reports demographic characteristics of participants by w3 FA supplement  
50  
51 use. Use of w3 FA supplements is highest among females compared to males  
52  
53 (p<0.0001) and those aged 60-79 years compared to those of other ages (p<0.0001).  
54  
55 Use of w3 FA supplements was also higher for those participants: residing in inner  
56  
57  
58  
59  
60

1  
2  
3 regional areas compared to those in outer regional areas ( $p < 0.0001$ ); having a trade,  
4 certificate of diploma compared to those with a tertiary education ( $p < 0.0001$ );  
5 having an annual household income of \$20,000–\$69,999 compared to those with  
6 higher or lower annual household income ( $p < 0.0001$ ); being widowed, divorced or  
7 separated compared to those who are single ( $p < 0.0001$ ); and having private health  
8 insurance compared to those with no private health insurance (There are statistically  
9 significant associations between w3 FA supplement use and gender, age, place of  
10 residence, education, household income, marital status, and health insurance (all  
11  $p < 0.0001$ ).

12  
13  
14  
15  
16  
17  
18  
19  
20  
21  
22  
23  
24  
25 INSERT TABLE 1 HERE  
26  
27  
28

29 Table 2 shows health status characteristics of participants by w3 FA supplement use.

30  
31 ~~Use of~~There are statistically significant associations between w3 FA supplements was  
32 highest among those participants who never smoked compared to current smokers  
33 ( $p < 0.0001$ ), drank 0–6 alcoholic drinks per week compared to those who drank  $\leq 21$   
34 alcoholic drinks per week ( $p < 0.0001$ ), supplement use and whosesmoking status,  
35 alcohol consumption, overall health and, overall quality of life were rated as being  
36 excellent, very good, or good compared to those whose overall health and quality of  
37 life were rated as fair or poor ( $p < 0.0001$ ). Participants who reported being treated  
38 for, osteoarthritis ( $p < 0.0001$ ), osteoporosis ( $p < 0.0001$ ), asthma ( $p < 0.0001$ ),  
39 cancer, high blood pressure ( $p < 0.0001$ ), high cholesterol ( $p < 0.0001$ ), and, thyroid  
40 problems ( $p < 0.0001$ ) were all higher users of omega-3 compared to those people  
41 who did not have these respective illnesses. Conversely, participants who reported  
42 being treated for cancer ( $p < 0.0001$ ), or did not report being treated for, anxiety  
43  
44  
45  
46  
47  
48  
49  
50  
51  
52  
53  
54  
55  
56  
57  
58  
59  
60



~~and depression ( $p < 0.0001$ ) were lower users of omega-3 compared to those who had not been treated for these conditions: all  $p < 0.0001$ ).~~

INSERT TABLE 2 HERE

The result of the multiple logistic regression modelling is presented in Table 3. Of all the diseases examined osteoarthritis, osteoporosis, high cholesterol, and anxiety and/or depression were positively associated with use of w3 FA supplements, while cancer and high blood pressure were negatively associated with the use of omega-3. That is, the odds of w3 FA supplement use was 1.65 (99% CI: 1.55, 1.76) times greater for those participants reporting treatment for osteoarthritis compared to those without osteoarthritis. The odds of omega-3 use was 1.09 (99% CI: 1.01, 1.18) times greater for those participants reporting osteoporosis compared to those without osteoporosis. In comparison to participants reporting treatment for anxiety or depression, those participants with anxiety only or both anxiety and depression were 1.16 (99% CI: 1.01, 1.34) and 1.19 (99% CI: 1.07, 1.32) times more likely to use w3 FA supplements, respectively. Those participants reporting treatment for high cholesterol were 1.23 (99% CI: 1.17, 1.29) times more likely to use omega-3 compared to those without high cholesterol. The odds of w3 FA supplement use was 0.89 (99% CI: 0.80, 0.99) and 0.95 (99% CI: 0.91, 0.99) times lower for those participants reporting treatment for cancer and high blood pressure, respectively.

INSERT TABLE 3 HERE

1  
2  
3 Table 3 also shows that those participants who rated their overall health to be fair or  
4  
5 poor were 0.82 (99% CI: 0.77, 0.86) less likely to use omega-3. In comparison to  
6  
7 current smokers, participants who were former smokers (OR=1.66; 99% CI: 1.53,  
8  
9 1.79) or never smoked (OR=1.56; 99% CI: 1.44, 1.69) were more likely to use w3 FA  
10  
11 supplements. In comparison to those participants who drank 0-6 alcoholic drinks  
12  
13 per week, participants who drank 14-20 alcoholic drinks (OR=0.94; 99% CI: 0.89,  
14  
15 1.00) or  $\geq 21$  alcoholic drinks (OR=0.83; 99% CI: 0.78, 0.89) were less likely to use  
16  
17 w3 FA supplements. Participants with no health insurance were 0.84 (99% CI: 0.80,  
18  
19 0.89) times less likely to use w3 FA supplements compared to participants with  
20  
21 private health insurance. In terms of household income, the odds of w3 FA  
22  
23 supplement use were 1.14 (99% CI: 1.08, 1.20) and 1.13 (99% CI: 1.06, 1.21) greater  
24  
25 for participants with an income of \$20,000-\$49,999 and \$50,000-\$69,999  
26  
27 respectively, compared to those with an income of <\$20,000. In comparison to those  
28  
29 participants who live in a major city, the odds of w3 FA supplement use are less for  
30  
31 those living in outer regional areas (OR=0.89; 99% CI: 0.85, 0.93) and remote or  
32  
33 very remote areas (OR=0.86; 99% CI: 0.75, 0.98). In comparison to those  
34  
35 participants aged 45-49 years, all other age groups have greater odds of w3 FA  
36  
37 supplement use, with the highest being those aged 60-69 (OR=1.84; 99% CI: 1.73,  
38  
39 1.96) and 70-79 (OR=1.76; 99% CI: 1.64, 1.90) years. In terms of gender, the odds of  
40  
41 w3 FA supplement use was 1.42 (99% CI: 1.36, 1.52) times greater for female  
42  
43  
44  
45  
46  
47 participants.

## 53 DISCUSSION

54  
55  
56  
57  
58  
59  
60

1  
2  
3 Our study, drawing upon the largest database with regards to w3 FA supplement use  
4 to date and constituting the first analyses of the profile of users and prevalence of use  
5 of w3 FA supplements in Australia, shows 32.6% of the study participants, aged 45  
6 years and older, consume w3 FA supplements. This finding identifies w3 FA  
7 supplements as one of the most commonly used dietary supplements amongst older  
8 Australians and is in line with previous research showing w3 FA supplements as  
9 among the top five complementary and alternative medicines recommended by  
10 Australian general practitioners and community pharmacists.[4] The discovery of  
11 such a high level of w3 FA supplement use amongst older Australians suggests that  
12 further research is needed to explore consumer behaviors and decision-making  
13 regarding w3 FA supplement use alongside assessing the possible health impacts of  
14 such consumption.  
15  
16  
17  
18  
19  
20  
21  
22  
23  
24  
25  
26  
27  
28  
29  
30

31 Overall, the findings of association between being female, of increased age, having  
32 advanced education *and* higher use of w3 FA supplements are congruent with factors  
33 predicting broader complementary and alternative medicine use.[3 22] The  
34 association of w3 FA supplement use with higher annual income and private health  
35 insurance highlights the potential importance of cost of w3 FA supplement products  
36 with regards to consumption and this issue warrants further investigation. It is also  
37 important to note that w3 FA supplements, like many complementary and  
38 alternative medicine products more generally, is not currently subsidised by the  
39 Australian Pharmaceutical Benefits Scheme (a Federal government program  
40 providing subsidised prescription drugs to residents) and attracts a further 10%  
41 goods and services tax that prescription medicines do not. As such, cost issues  
42 associated with w3 FA supplementation may be more focused in our Australian  
43  
44  
45  
46  
47  
48  
49  
50  
51  
52  
53  
54  
55  
56  
57  
58  
59  
60

1  
2  
3 population. Our finding of a positive association of w3 FA supplement use with  
4  
5 higher annual income may also relate to the suggestion that socioeconomic status  
6  
7 acts as a protective factor in health, with those having better life chances more likely  
8  
9 to adopt self-care measures to maintain their health and quality of life.[23]  
10

11  
12  
13 The low use of w3 FA supplements among participants resident in rural and remote  
14  
15 areas compared to those respondents living in metropolitan locations contradicts the  
16  
17 findings of previous research which show higher CAM use in rural areas in  
18  
19 Australia.[24] However, it does reflect findings from some national and international  
20  
21 studies which suggest lower rates of *commercial* or *pre-packaged* CAM product use  
22  
23 amongst some rural populations, when compared to their urban counterparts, which  
24  
25 may be associated with reduced access to these supplements. [24] Indeed, the urban-  
26  
27 rural divide in the use of complementary and alternative medicine is an issue that  
28  
29 has received much attention in recent years[24-26] and the results from our study  
30  
31 help add to the evidence-base and discussion of this important health service issue  
32  
33 and highlight the need for further investigation into the complexities of regional  
34  
35 variation in supplement use.  
36  
37  
38  
39  
40  
41

42 The variations in the association of w3 FA supplement use with a range of clinical  
43  
44 conditions are noteworthy, especially given the current varied clinical evidence-base  
45  
46 of w3 FA supplements. The finding of low w3 FA supplement use amongst people  
47  
48 with cancer is not unexpected as research evidence suggests no association between  
49  
50 w3 FA supplements and reducing cancer incidence.[10] Additionally, external factors  
51  
52 may also result in lower omega-3 supplement use amongst people with cancer:  
53  
54 patients may relinquish their CAM use when their use of other forms of medical  
55  
56  
57  
58  
59  
60

1  
2  
3 treatment increases;<sup>[27]</sup> or patients may be advised to cease all other medications  
4  
5 when undergoing cancer treatment.<sup>[28]</sup> However, it is somewhat surprising that  
6  
7 high blood pressure is negatively associated with the use of w3 FA supplement as  
8  
9 there is evidence that omega-3 has beneficial effects in the context of cardiovascular  
10  
11 disease and in lowering blood pressure.<sup>[29]</sup> This is an area worthy of further  
12  
13 empirical investigation.  
14

15  
16  
17  
18 The association of higher w3 FA supplement use with diseases such as osteoarthritis,  
19  
20 osteoporosis, anxiety and/or depression is interesting given there is currently either  
21  
22 conflicting or insufficient evidence on the efficacy of W3 FA supplements in  
23  
24 addressing these conditions – this suggests there may currently exist a mismatch  
25  
26 between clinical evidence and consumers' perceptions of evidence and benefits  
27  
28 regarding w3 FA supplement use. Together, these study findings highlight the  
29  
30 potential need for nutrition guidelines for w3 FA supplement intake and consumer  
31  
32 awareness of the use of w3 FA supplements as well as possible enhanced information  
33  
34 and labeling of relevant products in Australia. The study findings also add weight to  
35  
36 recently identified evidence illustrating a desire for good quality information about  
37  
38 w3 FA supplement products amongst GPs and pharmacists.<sup>[4]</sup>  
39  
40  
41  
42  
43  
44

45 The finding that respondents with better quality of life/health ratings or a healthy  
46  
47 lifestyle (e.g. non-smoking and/or having less alcoholic drinks) have greater odds of  
48  
49 w3 FA supplement use may indicate that w3 FA supplements are used for both the  
50  
51 treatment of specific health conditions and as a preventive therapy. Previous  
52  
53 research suggests that this distinction between therapeutic and preventive use also  
54  
55 exists for complementary and alternative medicine consumption more broadly.<sup>[30]</sup>  
56  
57  
58  
59  
60

1  
2  
3 Given these results, it would be useful for future studies to differentiate between  
4 these two approaches (therapeutic and preventive use) to use and to provide critical,  
5 in-depth examination of patients' motivations and understandings regarding  
6 consumption of w3 FA supplements and other CAM or dietary supplements.  
7  
8  
9  
10

11  
12  
13  
14 The interpretation of our findings is limited by the fact that the association between  
15 w3 FA supplement consumption with particular health conditions does not  
16 necessarily imply that w3 FA supplements have been used specifically for these  
17 conditions. In addition, the disease variable used from the 45 and Up Study survey  
18 was based on individuals reporting that they had been 'treated in last month' rather  
19 than 'ever been diagnosed' and that health, w3 FA supplement use and health care  
20 use is self-reported by the participants. As such our study results may be subject to  
21 recall bias and we may have missed some participants who had a disease but were  
22 not treated for it in the month prior to being surveyed. Currently this study focuses  
23 solely on the use of W3 FA supplements, and this research may have benefitted by  
24 including an analysis of usual dietary intake (e.g. food frequency questionnaire), in  
25 particular the consumption of omega 3 rich foods such as oily fish that may be also  
26 be consumed for therapeutic benefit. Given the sample of 45 and Up Study was  
27 drawn from the State of New South Wales, generalisation of the findings of this  
28 research to other parts of Australia should be treated with caution and as the study  
29 sample has been shown to be not representative of the New South Wales population  
30 on a number of characteristics, caution should be made in generalising the findings  
31 to the New South Wales population. Finally, as the statistical tests used in our  
32 analyses are influenced by sample size, the very large sample size in this study can  
33 make small difference appear to be significant. As such, readers need to take into  
34  
35  
36  
37  
38  
39  
40  
41  
42  
43  
44  
45  
46  
47  
48  
49  
50  
51  
52  
53  
54  
55  
56  
57  
58  
59  
60

1  
2  
3 account the absolute differences when interpreting the odds ratios. Nevertheless,  
4 these limitations are countered by the insights gained from analysing data from the  
5 largest sample of adults aged 45 years and older with regards to their consumption of  
6  
7  
8  
9  
10 w3 FA supplements.

## 11 12 13 14 15 16 **CONCLUSION**

17  
18 Our analysis of data from the 45 and Up Study cohort suggests that W3 FA  
19  
20 supplements are consumed for a wide variety of purposes by a considerable  
21  
22 proportion of Australians aged 45 years and over. In the context of these study  
23  
24 findings there is a need for primary health care practitioners to enquire with their  
25  
26 patients about their use of w3 FA supplements as well as for further work to ensure  
27  
28 provision of good quality information for patients and providers with regards to w3  
29  
30  
31  
32 FA products.  
33  
34  
35  
36  
37  
38  
39  
40  
41  
42  
43  
44  
45  
46  
47  
48  
49  
50  
51  
52  
53  
54  
55  
56  
57  
58  
59  
60

**Table 1 Demographic characteristic of people aged 45 years and older by w3 FA supplement use**

| Demographic Characteristics    | Use of w3 FA supplements   |             | p-value  |         |
|--------------------------------|----------------------------|-------------|----------|---------|
|                                | Yes                        | No          |          |         |
|                                | (n=86,939)                 | (n=179,907) |          |         |
|                                | % (SE)                     | % (SE)      |          |         |
| <b>Sex</b>                     | Female                     | 60 (0.2)    | 51 (0.1) | <0.0001 |
|                                | Male                       | 40 (0.2)    | 49 (0.1) |         |
| <b>Age (years)</b>             | 45-49                      | 10 (0.1)    | 14 (0.1) | <0.0001 |
|                                | 50-59                      | 32 (0.2)    | 34 (0.1) |         |
|                                | 60-69                      | 32 (0.2)    | 26 (0.1) |         |
|                                | 70-79                      | 17 (0.1)    | 15 (0.1) |         |
|                                | 80+                        | 9 (0.1)     | 11 (0.1) |         |
| <b>Place of Residence</b>      | Major city                 | 45 (0.2)    | 45 (0.1) | <0.0001 |
|                                | Inner regional             | 36 (0.2)    | 35 (0.1) |         |
|                                | Outer regional             | 17 (0.1)    | 18 (0.1) |         |
|                                | Remote/very remote         | 2 (0.1)     | 2 (0.1)  |         |
| <b>Education</b>               | School Certificate or less | 34 (0.2)    | 34 (0.1) | 0.0001  |
|                                | Higher School Certificate  | 10 (0.1)    | 10 (0.1) |         |
|                                | Trade/certificate/diploma  | 33 (0.2)    | 32 (0.1) |         |
|                                | Tertiary                   | 23 (0.1)    | 24 (0.1) |         |
| <b>Annual Household Income</b> | < \$20000                  | 25 (0.1)    | 25 (0.1) | <0.0001 |
|                                | \$20000-\$49999            | 33 (0.2)    | 31 (0.1) |         |
|                                | \$50000-\$69999            | 14 (0.1)    | 13 (0.1) |         |



1  
2  
3  
4  
5  
6  
7  
8  
9  
10  
11  
12  
13  
14  
15  
16  
17  
18  
19  
20  
21  
22  
23  
24  
25  
26  
27  
28  
29  
30  
31  
32  
33  
34  
35  
36  
37  
38  
39  
40  
41  
42  
43  
44  
45  
46  
47  
48  
49  
50  
51  
52  
53  
54  
55  
56  
57  
58  
59  
60

|                       |                      |          |          |         |
|-----------------------|----------------------|----------|----------|---------|
|                       | ≥ \$70000            | 28 (0.2) | 31 (0.1) |         |
| <b>Marital Status</b> | Married/defacto      | 75 (0.1) | 75 (0.1) | <0.0001 |
|                       | Widow/divorce/separ. | 20 (0.1) | 19 (0.1) |         |
|                       | Single               | 5 (0.1)  | 6 (0.1)  |         |
| <b>Health</b>         | Private              | 55 (0.2) | 53 (0.1) | <0.0001 |
| <b>Insurance</b>      | DVA or HCC           | 30 (0.2) | 29 (0.1) |         |
|                       | None                 | 15 (0.1) | 18 (0.1) |         |

---

\* SE = Standard Error

For peer review only

**Table 2 Health status characteristics of people aged 45 years and older by w3 FA supplement use**

| Health Status Characteristics  | Use of w3 FA supplements |             | p-value  |         |
|--------------------------------|--------------------------|-------------|----------|---------|
|                                | Yes                      | No          |          |         |
|                                | (n=86,939)               | (n=179,907) |          |         |
|                                | % (SE)                   | % (SE)      |          |         |
| <b>Smoking Status</b>          | Current smoker           | 5 (0.1)     | 8 (0.1)  | <0.0001 |
|                                | Former smoker            | 36 (0.2)    | 35 (0.1) |         |
|                                | Never smoked             | 59 (0.2)    | 56 (0.1) |         |
| <b>Alcohol Consumption</b>     | 0-6 drinks per week      | 64 (0.2)    | 62 (0.1) | <0.0001 |
|                                | 7-13 drinks per week     | 19 (0.1)    | 19 (0.1) |         |
|                                | 14-20 drinks per week    | 11 (0.1)    | 11 (0.1) |         |
|                                | ≥ 21 drinks per week     | 6 (0.1)     | 8 (0.1)  |         |
| <b>Overall Health</b>          | Excellent/very good/good | 87 (0.1)    | 85 (0.1) | <0.0001 |
|                                | Fair/poor                | 13 (0.1)    | 15 (0.1) |         |
| <b>Overall Quality Of Life</b> | Excellent/very good/good | 90 (0.1)    | 89 (0.1) | <0.0001 |
|                                | Fair/poor                | 10 (0.1)    | 11 (0.1) |         |
| <b>Osteoarthritis</b>          | Yes                      | 11 (0.1)    | 7 (0.1)  | <0.0001 |
|                                | No                       | 89 (0.1)    | 93 (0.1) |         |
| <b>Osteoporosis</b>            | Yes                      | 7 (0.1)     | 5 (0.1)  | <0.0001 |
|                                | No                       | 93 (0.1)    | 95 (0.1) |         |

|                                 |                 |          |          |         |
|---------------------------------|-----------------|----------|----------|---------|
| <b>Asthma</b>                   | Yes             | 5 (0.1)  | 4 (0.1)  | <0.0001 |
|                                 | No              | 95 (0.1) | 96 (0.1) |         |
| <b>Cancer</b>                   | Yes             | 2 (0.1)  | 3 (0.1)  | <0.0001 |
|                                 | No              | 98 (0.1) | 97 (0.1) |         |
| <b>High Blood Pressure</b>      | Yes             | 26 (0.1) | 24 (0.1) | <0.0001 |
|                                 | No              | 74 (0.1) | 76 (0.1) |         |
| <b>High Cholesterol</b>         | Yes             | 17 (0.1) | 14 (0.1) | <0.0001 |
|                                 | No              | 83 (0.1) | 86 (0.1) |         |
| <b>Heart Attack or Angina</b>   | Yes             | 3 (0.1)  | 3 (0.1)  | 0.2996  |
|                                 | No              | 97 (0.1) | 97 (0.1) |         |
| <b>Other Heart Disease</b>      | Yes             | 3 (0.1)  | 3 (0.1)  | 0.6606  |
|                                 | No              | 97 (0.1) | 97 (0.1) |         |
| <b>Thyroid Problems</b>         | Yes             | 6 (0.1)  | 5 (0.1)  | <0.0001 |
|                                 | No              | 94 (0.1) | 95 (0.1) |         |
| <b>Anxiety &amp; Depression</b> | Neither         | 91 (0.1) | 92 (0.1) | <0.0001 |
|                                 | Depression only | 4 (0.1)  | 4 (0.1)  |         |
|                                 | Anxiety only    | 2 (0.1)  | 1 (0.1)  |         |
|                                 | Both            | 3 (0.1)  | 3 (0.1)  |         |

---

\* SE = Standard Error

**Table 3 Multiple logistic regression model for predicting use of w3 FA supplements in people aged 45 years and older**

| <b>Factor</b>                  |                    | <b>Odds Ratio</b> | <b>99% C.I.</b> |
|--------------------------------|--------------------|-------------------|-----------------|
| <b>Sex</b>                     | Male               | 1.00              | —               |
|                                | Female             | 1.42              | 1.37, 1.48      |
| <b>Age</b>                     | 45-49              | 1.00              | —               |
|                                | 50-59              | 1.43              | 1.36, 1.52      |
|                                | 60-69              | 1.84              | 1.73, 1.96      |
|                                | 70-79              | 1.76              | 1.64, 1.90      |
|                                | 80+                | 1.32              | 1.21, 1.44      |
| <b>Place of Residence</b>      | Major city         | 1.00              | —               |
|                                | Inner regional     | 0.98              | 0.95, 1.02      |
|                                | Outer regional     | 0.89              | 0.85, 0.93      |
|                                | Remote/very remote | 0.86              | 0.75, 0.98      |
| <b>Annual Household Income</b> | < \$20000          | 1.00              | —               |
|                                | \$20000-\$49999    | 1.14              | 1.08, 1.20      |
|                                | \$50000-\$69999    | 1.13              | 1.06, 1.21      |
|                                | ≥ \$70000          | 1.03              | 0.97, 1.10      |
| <b>Insurance</b>               | Private            | 1.00              | —               |
|                                | DVA or HCC         | 0.93              | 0.89, 0.98      |
|                                | None               | 0.84              | 0.80, 0.89      |
| <b>Smoking</b>                 | Current smoker     | 1.00              | —               |

|    |                       |                          |      |            |
|----|-----------------------|--------------------------|------|------------|
| 1  |                       |                          |      |            |
| 2  |                       |                          |      |            |
| 3  | <b>Status</b>         | Former smoker            | 1.66 | 1.53, 1.79 |
| 4  |                       | Never smoked             | 1.56 | 1.44, 1.69 |
| 5  |                       |                          |      |            |
| 6  |                       |                          |      |            |
| 7  |                       |                          |      |            |
| 8  | <b>Alcohol</b>        | 0-6 drinks per week      | 1.00 | —          |
| 9  |                       |                          |      |            |
| 10 | <b>Consumption</b>    | 7-13 drinks per week     | 1.02 | 0.97, 1.07 |
| 11 |                       | 14-20 drinks per week    | 0.94 | 0.89, 1.00 |
| 12 |                       | ≥ 21 drinks per week     | 0.83 | 0.78, 0.89 |
| 13 |                       |                          |      |            |
| 14 |                       |                          |      |            |
| 15 |                       |                          |      |            |
| 16 |                       |                          |      |            |
| 17 | <b>Overall</b>        | Excellent/very good/good | 1.00 | —          |
| 18 | <b>Health</b>         | Fair/poor                | 0.82 | 0.77, 0.86 |
| 19 |                       |                          |      |            |
| 20 |                       |                          |      |            |
| 21 |                       |                          |      |            |
| 22 | <b>Osteoarthritis</b> | No                       | 1.00 | —          |
| 23 |                       | Yes                      | 1.65 | 1.55, 1.76 |
| 24 |                       |                          |      |            |
| 25 |                       |                          |      |            |
| 26 |                       |                          |      |            |
| 27 | <b>Osteoporosis</b>   | No                       | 1.00 | —          |
| 28 |                       | Yes                      | 1.09 | 1.01, 1.18 |
| 29 |                       |                          |      |            |
| 30 |                       |                          |      |            |
| 31 |                       |                          |      |            |
| 32 | <b>Cancer</b>         | No                       | 1.00 | —          |
| 33 |                       | Yes                      | 0.89 | 0.80, 0.99 |
| 34 |                       |                          |      |            |
| 35 |                       |                          |      |            |
| 36 |                       |                          |      |            |
| 37 |                       |                          |      |            |
| 38 | <b>High Blood</b>     | No                       | 1.00 | —          |
| 39 | <b>Pressure</b>       | Yes                      | 0.95 | 0.91, 0.99 |
| 40 |                       |                          |      |            |
| 41 |                       |                          |      |            |
| 42 |                       |                          |      |            |
| 43 | <b>High</b>           | No                       | 1.00 | —          |
| 44 | <b>Cholesterol</b>    | Yes                      | 1.23 | 1.17, 1.29 |
| 45 |                       |                          |      |            |
| 46 |                       |                          |      |            |
| 47 |                       |                          |      |            |
| 48 | <b>Anxiety &amp;</b>  | Neither                  | 1.00 | —          |
| 49 | <b>Depression</b>     | Depression only          | 1.01 | 0.92, 1.11 |
| 50 |                       | Anxiety only             | 1.16 | 1.01, 1.34 |
| 51 |                       | Both                     | 1.19 | 1.07, 1.32 |
| 52 |                       |                          |      |            |
| 53 |                       |                          |      |            |
| 54 |                       |                          |      |            |
| 55 |                       |                          |      |            |
| 56 |                       |                          |      |            |
| 57 |                       |                          |      |            |
| 58 |                       |                          |      |            |
| 59 |                       |                          |      |            |
| 60 |                       |                          |      |            |

## Glossary

|                    |                                        |
|--------------------|----------------------------------------|
| CAM                | Complementary and alternative medicine |
| DHA                | Docosahexaenoic acid                   |
| EPA                | Eicosapentaenoic acid                  |
| GP                 | General Practitioner                   |
| Omega-3 Fatty Acid | w3 FA                                  |

For peer review only

## ACKNOWLEDGEMENTS

We thank the men and women participating in the 45 and Up Study. The 45 and Up study is managed by the Sax Institute in collaboration with major partner Cancer Council New South Wales, and partners: the National Heart Foundation of Australia (NSW Division); NSW Health; *beyondblue: the national depression initiative*; Ageing, Disability and Home Care, Department of Human Services NSW; and UnitingCare Ageing.

## COMPETING INTERESTS

None.

## FUNDING

This research received no specific grant from any funding agency in the public, commercial or not-for-profit sectors.

## AUTHORS CONTRIBUTION

All authors devised the study and helped to conceptualize ideas, interpret findings, manuscript writing and reviewing drafts of the article. JA and DS acquired the data from the 45 and Up Study. DS undertook data analysis and JA, DS, CL, AB, JW

1  
2  
3 contributed to the interpretation of the data. All authors read and approved the final  
4  
5 manuscript.  
6  
7  
8  
9  
10

## 11 **DATA SHARING STATEMENT**

12  
13  
14  
15 There are no additional data available.  
16  
17  
18  
19  
20  
21  
22  
23  
24  
25  
26  
27  
28  
29  
30  
31  
32  
33  
34  
35  
36  
37  
38  
39  
40  
41  
42  
43  
44  
45  
46  
47  
48  
49  
50  
51  
52  
53  
54  
55  
56  
57  
58  
59  
60



## REFERENCES

1. Gahche J, Bailey R, Burt V, et al. Dietary Supplement Use Among U.S. Adults Has Increased Since NHANES III (1988–1994). NCHS Data Brief. Atlanta: Centers for Disease Control and Prevention, 2011:1-8.
2. Skeie G, Braaten T, Hjartåker A, et al. Use of dietary supplements in the European Prospective Investigation into Cancer and Nutrition calibration study. *Eur J Clin Nutr* 2009;**63**:226-38
3. Barnes PM, Bloom B, Nahin RL. Complementary and Alternative Medicine Use Among Adults and Children: United States, 2007 Hyattsville: U.S. Department of Health and Human Services, Division of Health Interview Statistics, Centers for Disease Control and Prevention, National Center for Health Statistics, 2008.
4. Brown J, Morgan T, Adams J, et al. Complementary Medicines Information Use and Needs of Health Professionals: General Practitioners and Pharmacists. Sydney: National Prescribing Service, 2008.
5. Chowdhury R, Stevens S, Gorman D, et al. Association between fish consumption, long chain omega 3 fatty acids, and risk of cerebrovascular disease: Systematic review and meta-analysis. *BMJ* 2012;**345**(e6698)
6. Filion KB, El Khoury F, Bielinski M, et al. Omega-3 fatty acids in high-risk cardiovascular patients: a meta-analysis of randomized controlled trials. *BMC Cardiovasc Disord* 2010;**10**(24)
7. Kromhout D, Yasuda S, Geleijnse JM, et al. Fish oil and omega-3 fatty acids in cardiovascular disease: do they really work? *European Heart Journal* 2012;**33**:436–43
8. Rizos EC, Ntzani EE, Bika E, et al. Association between omega-3 fatty acid supplementation and risk of major cardiovascular disease events: a systematic review and meta-analysis. *JAMA* 2012;**308**(10):1024-33
9. National Heart Foundation of Australia. Position Statement: Fish, Fish Oils, n-3 Polyunsaturated Fatty Acids and Cardiovascular Health. Sydney: National Heart Foundation of Australia, 2008.

10. MacLean CH, Newberry SJ, Mojica WA, et al. Effects of omega-3 fatty acids on cancer risk: a systematic review. *JAMA: Journal of the American Medical Association* 2006;**295**(4):403-15
11. Colomera R, Moreno-Nogueiraa JM, García-Lunaa PP, et al. N-3 fatty acids, cancer and cachexia: a systematic review of the literature. *British Journal of Nutrition* 2007;**97**(5):823-31
12. Lin P-Y, Su K-P. A meta-analytic review of double-blind, placebo-controlled trials of antidepressant efficacy of Omega-3 fatty acids. *Journal of Clinical Psychiatry* 2007;**68**(7):1056-61
13. Montgomery P, Richardson AJ. Omega-3 fatty acids for bipolar disorder. *Cochrane Database of Systematic Reviews* 2008(2):Art. No.: CD005169. DOI: 10.1002/14651858.CD005169.pub2
14. Thien FCK, De Luca S, Woods RK, et al. Dietary marine fatty acids (fish oil) for asthma in adults and children. *Cochrane Database of Systematic Reviews* 2002(2):Art. No.: CD001283. DOI: 10.1002/14651858.CD001283
15. Oliver C, Everard M, N'Diaye T. Omega-3 fatty acids (from fish oils) for cystic fibrosis. *Cochrane Database of Systematic Reviews* 2007(4)
16. Agency for Healthcare Research and Quality. Effects of omega-3 fatty acids on lipids and glycemic control in type II diabetes and the metabolic syndrome and on inflammatory bowel disease, rheumatoid arthritis, renal disease, systemic lupus erythematosus, and osteoporosis. Rockville: Agency for Healthcare Research and Quality, 2004.
17. Sydenham E, Dangour AD, Lim W-S. Omega 3 fatty acid for the prevention of cognitive decline and dementia. *Cochrane Database of Systematic Reviews* 2012(6) doi: 10.1002/14651858.CD005379.pub3[published Online First: Epub Date]].
18. James S, Montgomery P, Williams K. Omega-3 fatty acids supplementation for autism spectrum disorders (ASD). *Cochrane Database of Systematic Reviews* 2011(11) doi: 10.1002/14651858.CD007992.pub2[published Online First: Epub Date]].
19. Kickbusch I, Payne L. Twenty-first century health promotion: the public health revolution meets the wellness revolution. *Health Promotion International* 2003;**18**(4):275-78

- 1  
2  
3 20. 45 and Up Study Collaborators. Cohort profile: the 45 and Up Study.  
4 International Journal of Epidemiology 2008;**37**:941-47
- 5  
6 21. Mealing N, Banks E, Jorm L, et al. Investigation of relative risk estimates from  
7 studies of the same population with contrasting response rates and designs.  
8 BMC Medical Research Methodology 2010;**10**(26)
- 9  
10 22. Adams J, Sibbritt D, Easthope G, et al. The profile of women who consult  
11 alternative health practitioners in Australia. Medical Journal of Australia  
12 2003;**179**:297-300
- 13  
14 23. Cockerham WC. Health lifestyles: Bringing structure back. In: Cockerham WC,  
15 ed. The New Blackwell Companion to Medical Sociology. Oxford: Wiley-  
16 Blackwell, 2009:159-83.
- 17  
18 24. Wardle J, Lui C-W, Adams J. Complementary and alternative medicine in rural  
19 communities: current research and future directions. Journal of Rural Health  
20 2012;**28**(1):101-12
- 21  
22 25. Adams J, Sibbritt D, Lui C-W. The urban-rural divide in complementary and  
23 alternative medicine use: a longitudinal study of 10,638 women. BMC  
24 Complementary and Alternative Medicine 2011;**11**(2)
- 25  
26 26. Adams J. Exploring the interface between complementary and alternative  
27 medicine (CAM) and rural general practice: A call for research. Health and  
28 Place 2004;**10**(3):285-87
- 29  
30 27. Sibbritt DW, Adams J, Young AF. A longitudinal analysis of mid-age women's use  
31 of complementary and alternative medicine (CAM) in Australia, 1996-1998.  
32 Women Health 2004;**40**(4):41-56
- 33  
34 28. Broom A, Adams J. Oncology clinicians' accounts of discussing complementary  
35 and alternative medicine with their patients. Health 2009;**13**(3):317-36
- 36  
37 29. Wang C, Harris WS, Chung M, et al. N-3 Fatty acids from fish or fish-oil  
38 supplements, but not alpha-linolenic acid, benefit cardiovascular disease  
39 outcomes in primary- and secondary-prevention studies: a systematic review.  
40 Am J Clin Nutr 2006;**84**(1):5-17
- 41  
42 30. Bishop FL, Yardley L, Lewith GT. Treat or treatment - a qualitative study  
43 analyzing patients' use of CAM. American Journal of Public Health  
44 2008;**98**(9):1700-05
- 45  
46  
47  
48  
49  
50  
51  
52  
53  
54  
55  
56  
57  
58  
59  
60
